# Supplementary material
Source: publisher figshare collection journal article supplement (https://acs.figshare.com/ndownloader/files/4462024)

## Supporting Information

# Further Studies Towards the Stereocontrolled Synthesis of Silicon-Containing Peptide Mimics

*Dácil Hernández, Karl B. Lindsay, Lone Nielsen, Tina Mittag, Klaus Bjerglund, Stig Friis,  
Rasmus Mose, Troels Skrydstrup\**

Center for Insoluble Protein Structures, Department of Chemistry and Interdisciplinary  
Nanoscience Center, Aarhus University, Langelandsgade 140, 8000 Aarhus C, Denmark.

E-mail: ts@chem.au.dk

### Table of contents:

|                                    |            |
|------------------------------------|------------|
| Table of contents                  | <b>S1</b>  |
| General methods                    | <b>S2</b>  |
| Additional experimental procedures | <b>S2</b>  |
| Additional references              | <b>S20</b> |
| NMR spectra                        | <b>S22</b> |

## General Methods.

Unless otherwise noted all reactions were carried out under inert atmosphere. Solvents were dried according to standard procedures, reactions were monitored by thin-layer chromatography (TLC) analysis. All other chemicals were used as received from the appropriate suppliers. Flash chromatography was carried out on silica gel 60 (230-400 mesh). The  $^1\text{H}$  NMR spectra were recorded at 400 MHz and  $^{13}\text{C}$  NMR spectra were recorded at 100 MHz. The chemical shifts are reported in ppm downfield to TMS ( $\delta = 0$ ) and referenced using the residual  $\text{CHCl}_3$  resonance ( $\delta = 7.26$ ) for  $^1\text{H}$  NMR and the central  $\text{CDCl}_3$  resonance ( $\delta = 77.16$ ) for  $^{13}\text{C}$  NMR.  $^1\text{H}$  NMR spectra are reported as follows (s = singlet, d = doublet, t = triplet, q = quartet, quin = quintet, hex = hextet, br = broad; coupling constant(s) in Hz; integration). Optical rotations were measured at the sodium line at ambient temperature (22 °C) in  $\text{CHCl}_3$  solutions.

## Additional experimental procedures.

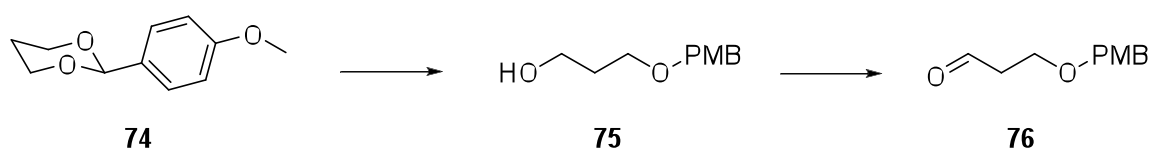

**2-(4-Methoxyphenyl)-1,3-dioxane (74).**<sup>1</sup> 4-Methoxybenzaldehyde dimethyl acetal (565 mg, 3.10 mmol) was dissolved in dry toluene (10 mL) in a dry round-bottomed flask. TsOH (31 mg, 0.18 mmol) and anhydrous  $\text{MgSO}_4$  (1.0 g, 8.3 mmol) were added to the stirred solution, followed by addition of 1,3-propanediol (474 mg, 6.23 mmol). The reaction mixture was kept under argon flow and heated to 90 °C to remove methanol. After 2.5 h the reaction was judged complete by TLC and all volatiles were removed *in vacuo*. The resulting mixture was dissolved in EtOAc (30 mL) and washed with sat  $\text{NaHCO}_3$  (4  $\times$  30 mL). The organic phase was dried ( $\text{MgSO}_4$ ), filtered and evaporated *in vacuo*, giving

the crude compound **74** (602 mg, 95% purity, 2.944 mmol, 95%) which could not be separated from residual anisaldehyde (approx. 5% according to  $^1\text{H}$  NMR) by column chromatography.  $^1\text{H}$  NMR (400 MHz,  $\text{CDCl}_3$ )  $\delta$  (ppm) 7.43–7.39 (m, 2H), 6.90–6.87 (m, 2H), 5.46 (s, 1H), 4.28–4.23 (m, 2H), 4.01–3.94 (m, 2H), 3.80 (s, 3H), 2.28–2.16 (m, 1H), 1.46–1.40 (m, 1H).  $^{13}\text{C}$  NMR (100 MHz,  $\text{CDCl}_3$ )  $\delta$  (ppm) 160.1, 131.5, 127.4 (2C), 113.7 (2C), 101.7, 67.5 (2C), 55.4, 25.9. HRMS  $\text{C}_{11}\text{H}_{14}\text{O}_3$   $[\text{M}+\text{Na}^+]$ ; calculated: 217.0841, found: 217.0844.

**3-(4-Methoxybenzyloxy)propan-1-ol (75).** <sup>1</sup> Acetal **74** (597 mg, 3.07 mmol) was dissolved in  $\text{Et}_2\text{O}$  (15 mL) and then cooled to 0 °C under argon atmosphere. A 1.7 M solution of DIBAL in toluene (4.0 mL, 6.8 mmol) was added via syringe and stirring continued at 0 °C for 3.5 h. Then the reaction was quenched with an aqueous solution of Rochelles salt (0.5 M, 15 mL), resulting in a white jelly which was left to stir for additional 20 min. The aqueous solution was extracted with  $\text{Et}_2\text{O}$  (4  $\times$  40 mL) and the combined organic phases were dried ( $\text{MgSO}_4$ ), filtered and concentrated *in vacuo*. The pure product was obtained by column chromatography (increasing polarity from 25% to 65%  $\text{EtOAc}$  in pentane as eluant), which gave **75** (584 mg, 2.98 mmol, 97%) as a colourless oil.  $^1\text{H}$  NMR (400 MHz,  $\text{CDCl}_3$ )  $\delta$  (ppm) 7.25 (d,  $J$  = 8.4 Hz, 2H), 6.88 (d,  $J$  = 8.0 Hz, 2H), 4.45 (s, 2H), 3.80 (s, 3H), 3.78 (t,  $J$  = 5.6 Hz, 2H), 3.63 (t,  $J$  = 5.6 Hz, 2H), 2.32 (br s, 1H), 1.85 (quin,  $J$  = 5.6 Hz, 2H).  $^{13}\text{C}$  NMR (100 MHz,  $\text{CDCl}_3$ )  $\delta$  (ppm) 159.4, 130.3, 129.4 (2C), 114.0 (2C), 73.1, 69.3, 62.1, 55.4, 32.2. HRMS  $\text{C}_{11}\text{H}_{16}\text{O}_3$   $[\text{M}+\text{Na}^+]$ ; calculated: 219.0997, found: 219.1004.

**3-(4-Methoxybenzyloxy)propanal (76).** To a dry round-bottomed flask was added DMSO (1.7 mL, 24 mmol) and dry  $\text{CH}_2\text{Cl}_2$  (25 mL), and the mixture was cooled to –60 °C under argon, followed by the dropwise addition of oxalylchloride (1.0 mL, 11.0 mmol). After 30 min alcohol **75** (974 mg, 4.96 mmol) in  $\text{CH}_2\text{Cl}_2$  (5 mL) was added and the reaction was stirred for additional 1.5 h.  $\text{NEt}_3$  (5 mL, 36.0 mmol) was then added and the reaction mixture was allowed to warm to rt. Then it was quenched with water

(50 mL), the phases were separated and the aqueous layer was extracted with CH<sub>2</sub>Cl<sub>2</sub> (3 × 50 mL). The combined organic phases were washed with sat NaHCO<sub>3</sub> (3 × 50 mL), and brine (50 mL), dried (MgSO<sub>4</sub>), filtered, and evaporated *in vacuo* giving **76** (1.02 g, 4.91 mmol, 99%), as a pungent yellow oil, which was used without further purification. <sup>1</sup>H NMR (400 MHz, CDCl<sub>3</sub>) δ (ppm) 9.78 (t, *J* = 2.0 Hz, 1H), 7.25 (d, *J* = 8.8 Hz, 2H), 6.88 (d, *J* = 8.4 Hz, 2H), 4.46 (s, 2H), 3.80 (s, 3H), 3.78 (t, *J* = 6.0 Hz, 2H), 2.67 (dt, *J* = 6.0, 2.0 Hz, 2H). <sup>13</sup>C NMR (100 MHz, CDCl<sub>3</sub>) δ (ppm) 201.3, 159.5, 130.1, 129.5 (2C), 114.0 (2C), 73.1, 63.7, 55.4, 44.0. HRMS C<sub>11</sub>H<sub>14</sub>O<sub>3</sub> [M+Na<sup>+</sup>]; calculated: 217.0841, found: 217.0842.

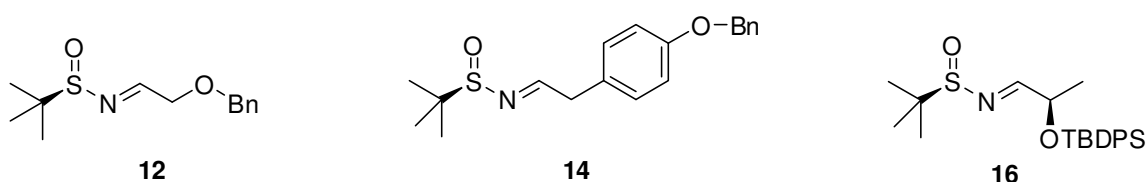

**(R,E)-N-(2-(Benzyloxy)ethylidene)-2-methylpropane-2-sulfinamide (12).**<sup>2</sup> **General Procedure for Preparation of Sulfinimines. Method A.** 2-Benzyloxyethanal<sup>3</sup> (400 mg, 2.66 mmol) was dissolved in dry CH<sub>2</sub>Cl<sub>2</sub> (25 mL) and (*R*)-*tert*-butylsulfinamide (330 mg, 2.71 mmol), PPTS (5 mg, 0.02 mmol) and MgSO<sub>4</sub> were added. The reaction was heated at reflux for 18 h. Then the reaction mixture was filtered and the solids washed with CH<sub>2</sub>Cl<sub>2</sub> (2 × 10 mL). The combined filtrates were evaporated *in vacuo* and the pure product was obtained by column chromatography (20% EtOAc in pentane as eluant) which gave **12** (667 mg, 79%) as a colourless oil. <sup>1</sup>H NMR (400 MHz, CDCl<sub>3</sub>) δ (ppm) 8.13 (t, *J* = 3.2 Hz, 1H), 7.32–7.38 (m, 5H), 4.64 (s, 2H), 4.43 (dd, *J* = 16.4, 3.2 Hz, 1H), 4.38 (dd, *J* = 16.4, 3.2 Hz, 1H), 1.21 (s, 9H). <sup>13</sup>C NMR (100 MHz, CDCl<sub>3</sub>) δ (ppm) 166.9, 137.4, 128.7 (2C), 128.2, 128.0 (2C), 73.5, 71.4, 57.1, 22.6 (3C). HRMS C<sub>13</sub>H<sub>19</sub>NO<sub>2</sub>S [M+Na<sup>+</sup>]; calculated: 276.1029, found: 276.1038.



**(*R,E*)-*N*-(2-(4-(Benzyloxy)phenyl)ethylidene)-2-methylpropane-2-sulfinamide (14).** It was prepared from 2-(4-(Benzyloxy)phenyl)ethanal<sup>4</sup> (520 mg, 2.20 mmol 1.22 equiv) according to Method A. Increasing polarity from 15% to 20% EtOAc in pentane was used as eluant for column chromatography giving **14** (58%) as an oil. <sup>1</sup>H NMR (400 MHz, CDCl<sub>3</sub>)  $\delta$  (ppm) 8.12 (t, *J* = 4.8 Hz, 1H), 7.45–7.30 (m, 5H), 7.15 (d, *J* = 8.4 Hz, 2H), 6.95 (d, *J* = 8.4 Hz, 2H), 5.06 (s, 2H), 3.77 (ABX system, *J* = 5.0 Hz, 1H), 3.74 (ABX system, *J* = 5.0 Hz, 1H), 1.21 (s, 9H). <sup>13</sup>C NMR (100 MHz, CDCl<sub>3</sub>)  $\delta$  (ppm) 167.7, 158.0, 137.0, 130.3 (2C), 128.6 (2C), 128.0, 127.5 (2C), 127.1, 115.3 (2C), 70.1, 56.9, 41.8, 22.4 (3C). HRMS C<sub>19</sub>H<sub>23</sub>NO<sub>2</sub>S [M+Na<sup>+</sup>]; calculated: 352.1347, found: 352.1351.

**(*R,E*)-*N*-((*R*)-2-(*tert*-Butyldiphenylsilyloxy)propylidene)-2-methylpropane-2-sulfinamide (16).**<sup>5</sup> It was prepared from (*R*)-2-(*tert*-butyldiphenylsilyloxy)propanal<sup>6</sup> according to Method A. Increasing polarity from 5% to 10% EtOAc in pentane was used as eluant for column chromatography giving **16** (89%) as an oil. <sup>1</sup>H NMR (400 MHz, CDCl<sub>3</sub>)  $\delta$  (ppm) 8.02 (d, *J* = 4.0 Hz, 1H), 7.69–7.63 (m, 4H), 7.46–7.33 (m, 6H), 4.59 (qd, *J* = 6.8, 4.0 Hz, 1H), 1.28 (d, *J* = 6.8 Hz, 3H), 1.14 (s, 9H), 1.08 (s, 9H). <sup>13</sup>C NMR (100 MHz, CDCl<sub>3</sub>)  $\delta$  (ppm) 171.4, 136.0 (4C), 134.0 (2C) 130.0 (2C), 127.8 (4C), 71.5, 56.9, 27.0 (3C), 22.5 (3C), 21.7, 19.4. HRMS C<sub>23</sub>H<sub>33</sub>NO<sub>2</sub>SSi [M+Na<sup>+</sup>]; calculated: 438.1899, found: 438.1901.

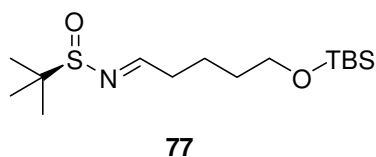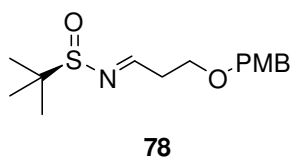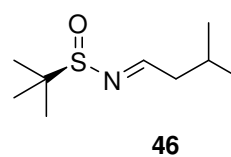

**(*R,E*)-*N*-(5-(*tert*-Butyldimethylsilyloxy)pentylidene)-2-methylpropane-2-sulfinamide (77).** It was prepared from 5-(*tert*-butyldimethylsilyloxy)pentanal<sup>7</sup> according to Method A. Increasing polarity from 5% to 20% EtOAc in pentane was used as eluant for column chromatography giving **77** (85%) as an oil. <sup>1</sup>H NMR (400 MHz, CDCl<sub>3</sub>)  $\delta$  (ppm) 8.07 (t, *J* = 4.8 Hz, 1H), 3.62 (t, *J* = 6.4 Hz, 2H), 2.53 (td, *J* = 6.8,

4.8 Hz, 2H), 1.73–1.64 (m, 2H), 1.62–1.53 (m, 2H), 1.18 (s, 9H), 0.88 (s, 9H), 0.03 (s, 6H).  $^{13}\text{C}$  NMR (100 MHz,  $\text{CDCl}_3$ )  $\delta$  (ppm) 169.7, 62.8, 36.0, 32.4, 28.3, 26.1 (3C), 24.9, 22.5 (3C), 22.1, 18.5, –5.2. HRMS  $\text{C}_{15}\text{H}_{33}\text{NO}_2\text{SSi}$   $[\text{M}+\text{Na}^+]$ ; calculated: 342.1899, found: 342.1896.

**(*R,E*)-*N*-(3-(4-Methoxybenzyloxy)propylidene)-2-methylpropane-2-sulfinamide (78).** It was prepared from aldehyde **76** according to Method A. Increasing polarity from 5% to 20% EtOAc in pentane was used as eluant for column chromatography giving **78** (77%) as a pale yellow oil.  $^1\text{H}$  NMR (400 MHz,  $\text{CDCl}_3$ )  $\delta$  (ppm) 8.09 (t,  $J = 4.4$  Hz, 1H), 7.23 (m, 2H), 6.87 (m, 2H), 4.44 (s, 2H), 3.79 (s, 3H), 3.74 (t,  $J = 6.0$  Hz, 2H), 2.79 (td,  $J = 6.0, 4.4$  Hz, 2H), 1.20 (s, 9H).  $^{13}\text{C}$  NMR (100 MHz,  $\text{CDCl}_3$ )  $\delta$  (ppm) 167.5, 159.4, 130.1, 129.4 (2C), 113.9 (2C), 73.0, 66.0, 56.8, 55.4, 36.7, 22.5 (3C). HRMS  $\text{C}_{15}\text{H}_{23}\text{NO}_3\text{S}$   $[\text{M}+\text{Na}^+]$ ; calculated: 320.1296, found: 320.1295.

**(*R,E*)-2-Methyl-*N*-(3-methylbutylidene)propane-2-sulfinamide (46).**<sup>8</sup> It was prepared from isovaleraldehyde according to Method A. Increasing polarity from 5% to 10% EtOAc in pentane was used as eluant for column chromatography, giving **46** (95%) as an oil.  $^1\text{H}$  NMR (400 MHz,  $\text{CDCl}_3$ )  $\delta$  (ppm) 8.05 (t,  $J = 5.2$  Hz, 1H), 2.40 (ddd,  $J = 6.8, 5.6, 1.6$  Hz, 2H), 2.05 (m, 1H), 1.19 (s, 9H), 0.98 (d,  $J = 6.8$  Hz, 3H), 0.98 (d,  $J = 6.8$  Hz, 3H).  $^{13}\text{C}$  NMR (100 MHz,  $\text{CDCl}_3$ )  $\delta$  (ppm) 169.4, 56.5, 45.0, 26.2, 22.6, 22.5, 22.4 (3C). HRMS  $\text{C}_9\text{H}_{19}\text{NOS}$   $[\text{M}+\text{Na}^+]$ ; calculated: 212.1085, found: 212.1087.

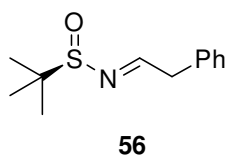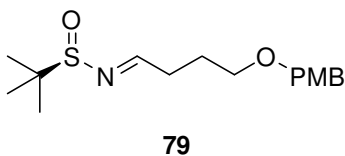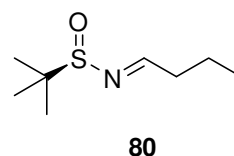

**(*R,E*)-2-Methyl-*N*-(2-phenylethylidene)propane-2-sulfinamide (56).**<sup>9</sup> It was prepared from phenyl acetaldehyde according to Method A.  $\text{CH}_2\text{Cl}_2$  was used as eluant for column chromatography giving **56** (87%) as an oil.  $^1\text{H}$  NMR (400 MHz,  $\text{CDCl}_3$ )  $\delta$  (ppm) 8.13 (t,  $J = 5.2$  Hz, 1H), 7.35–7.22 (m, 5H), 3.85

(dd,  $J = 15.2, 5.2$  Hz, 1H), 3.81 (dd,  $J = 15.2, 5.2$  Hz, 1H), 1.19 (s, 9H).  $^{13}\text{C}$  NMR (100 MHz,  $\text{CDCl}_3$ )  $\delta$  (ppm) 167.6, 135.0, 129.4 (2C), 129.0 (2C), 127.3, 57.0, 42.8, 22.5 (3C). HRMS  $\text{C}_{12}\text{H}_{17}\text{NOS}$  [ $\text{M}+\text{Na}^+$ ]; calculated: 246.0929, found: 246.0933.

**(*R,E*)-*N*-(4-(4-Methoxybenzyloxy)butylidene)-2-methylpropane-2-sulfinamide (79).**<sup>10</sup> **General**

**Procedure for Preparation of Sulfinimines. Method B.** (*R*)-*tert*-Butylsulfinamide (672 mg, 5.54 mmol) and 4-(4-methoxybenzyloxy)butanal<sup>11</sup> (5.09 mmol 0.92 equiv) were dissolved in  $\text{CH}_2\text{Cl}_2$  (18 mL) and  $\text{Cs}_2\text{CO}_3$  (2.17 g, 6.65 mmol, 1.2 equiv) was added. The mixture was heated to reflux for 18 h, then cooled and filtered through a pad of celite. The solids were washed with  $\text{CH}_2\text{Cl}_2$ , and then the combined filtrates were evaporated *in vacuo*. The pure product was obtained by column chromatography using 5% to 40% EtOAc in pentane as eluant, giving **79** (1.0 g, 3.21 mmol, 63%) as an oil.  $^1\text{H}$  NMR (400 MHz,  $\text{CDCl}_3$ )  $\delta$  (ppm) 8.08 (t,  $J = 4.4$  Hz, 1H), 7.23 (dt,  $J = 8.8, 2.0$  Hz, 2H), 6.86 (dt,  $J = 8.8, 2.0$  Hz, 2H), 4.41 (s, 2H), 3.78 (s, 3H), 3.49 (t,  $J = 6.0$  Hz, 2H), 2.60 (td,  $J = 7.2, 4.4$  Hz, 2H), 1.92 (pent,  $J = 6.8$  Hz, 2H), 1.16 (s, 9H).  $^{13}\text{C}$  NMR (100 MHz,  $\text{CDCl}_3$ )  $\delta$  (ppm) 169.0, 159.1, 130.3, 129.2 (2C), 113.7 (2C), 72.6, 68.8, 56.4, 55.2, 32.9, 25.5, 22.2 (3C). HRMS  $\text{C}_{16}\text{H}_{25}\text{NO}_3\text{S}$  [ $\text{M}+\text{Na}^+$ ]; calculated: 334.1453, found: 334.1407.

**(*R,E*)-*N*-Butylidene-2-methylpropane-2-sulfinamide (80).**<sup>12</sup> It was prepared from butyraldehyde according to Method B. 10% EtOAc in pentane was used as eluant for column chromatography, giving **80** (63%) as an oil.  $^1\text{H}$  NMR (400 MHz,  $\text{CDCl}_3$ )  $\delta$  (ppm) 8.06 (t,  $J = 4.8$  Hz, 1H), 2.49 (td,  $J = 7.2, 4.8$  Hz, 2H), 1.65 (sext,  $J = 7.2$  Hz, 2H), 1.19 (s, 9H), 0.99 (t,  $J = 7.2$  Hz, 3H).  $^{13}\text{C}$  NMR (100 MHz,  $\text{CDCl}_3$ )  $\delta$  (ppm) 169.8, 56.6, 38.2, 22.5 (3C), 19.1, 13.9. HRMS  $\text{C}_8\text{H}_{17}\text{NOS}$  [ $\text{M}+\text{Na}^+$ ]; calculated: 198.0929, found: 198.0925.

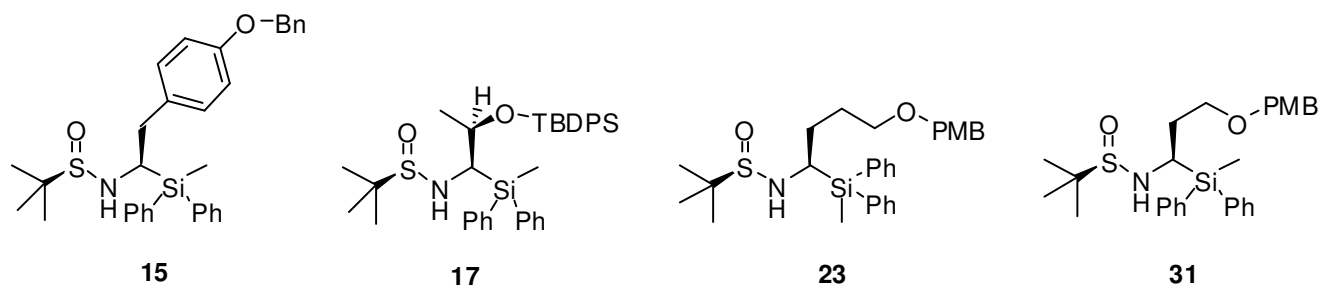

**(R)-N-((R)-2-(4-(Benzyloxy)phenyl)-1-(methyldiphenylsilyl)ethyl)-2-methylpropane-2-sulfinamide (15).** **General Procedure for the Addition of (Diphenylmethyldiphenylsilyl)lithium to Sulfinimines.** Lithium (36 mg, 6.0 mmol, 12.0 equiv) was suspended in THF (5 mL) under argon atmosphere, and then diphenylmethyldiphenylchlorosilane (0.31 mL, 1.50 mmol, 3.0 equiv) was added, before the mixture was stirred at rt for 4 h. In a separate flask sulfinimine **14** (164.5 mg, 0.50 mmol, 1 equiv) was dissolved in THF (5 mL) and the solution cooled to  $-78\text{ }^{\circ}\text{C}$  under argon atmosphere. To this cooled solution, the solution of lithium diphenylmethyldiphenylsilane was added dropwise over 5 min via syringe. The solution was stirred at  $-78\text{ }^{\circ}\text{C}$  for 18h, then water (2 mL) was added and the mixture allowed to warm to rt. The mixture was poured into water (50 mL) and extracted with EtOAc ( $3 \times 20\text{ mL}$ ), then the combined organic portions were dried ( $\text{MgSO}_4$ ), filtered and evaporated *in vacuo*. The pure product was obtained by column chromatography using 15% to 30% EtOAc in pentane as eluant, giving **15** (120 mg, 0.23 mmol, 45%) as an oil.  $^1\text{H}$  NMR (400 MHz,  $\text{CDCl}_3$ )  $\delta$  (ppm) 7.57–7.31 (m, 15H), 7.10 (d,  $J = 8.8\text{ Hz}$ , 2H), 6.87 (d,  $J = 8.8\text{ Hz}$ , 2H), 5.03 (s, 2H), 3.75 (dt,  $J = 9.2, 6.4\text{ Hz}$ , 1H), 3.17 (d,  $J = 9.2\text{ Hz}$ , 1H), 3.14 (ABX system,  $J = 6.4\text{ Hz}$ , 1H), 3.06 (ABX system,  $J = 6.4\text{ Hz}$ , 1H), 1.02 (s, 9H), 0.47 (s, 3H).  $^{13}\text{C}$  NMR (100 MHz,  $\text{CDCl}_3$ )  $\delta$  (ppm) 157.5, 137.2, 135.0 (4C), 134.8, 134.7, 131.0 (2C), 130.8 (2C), 129.6 (2C), 128.6 (2C), 128.0 (4C), 127.5 (2C), 114.8 (2C), 70.0, 56.4, 47.5, 38.5, 22.5 (3C),  $-5.1$ . HRMS  $\text{C}_{32}\text{H}_{37}\text{NO}_2\text{SSi}$   $[\text{M}+\text{Na}^+]$ ; calculated: 550.2212, found: 550.2222.

**(*R*)-*N*-((1*R*,2*R*)-2-(*tert*-Butyldiphenylsilyloxy)-1-(methyldiphenylsilyl)propyl)-2-methylpropane-2-sulfinamide (17).** It was prepared from sulfinimine **16** according to the previous general procedure. An 8:8:1 mixture of pentane:CH<sub>2</sub>Cl<sub>2</sub>:diethylether was used as eluant for column chromatography, giving **17** (48%) as an oil. <sup>1</sup>H NMR (400 MHz, CDCl<sub>3</sub>) δ (ppm) 7.71–7.56 (m, 6H), 7.47–7.30 (m, 14H), 4.48 (qd, *J* = 6.4, 2.8 Hz, 1H), 3.45 (m, 1H), 3.36 (m, 1H), 1.16 (d, *J* = 6.4 Hz, 3H), 1.07 (s, 9H), 0.99 (s, 9H), 0.83 (s, 3H). <sup>13</sup>C NMR (100 MHz, CDCl<sub>3</sub>) δ (ppm) 136.1 (2C), 136.0 (2C), 135.8, 135.5 (2C), 135.3, 134.9 (2C), 134.2, 133.7, 129.8, 129.7 (2C), 129.5, 128.0 (4C), 127.8 (2C), 127.6 (2C), 71.5, 56.4, 52.8, 27.3 (3C), 22.7 (3C), 21.9, 19.3, –3.4. HRMS C<sub>36</sub>H<sub>47</sub>NO<sub>2</sub>SSi<sub>2</sub> [M+Na<sup>+</sup>]; calculated: 636.2746, found: 636.2767.

**(*R*)-*N*-((*R*)-4-(4-Methoxybenzyloxy)-1-(methyldiphenylsilyl)butyl)-2-methylpropane-2-sulfinamide (23).**<sup>10</sup> It was prepared from sulfinimine **79** according to the previous general procedure. Increasing polarity from 10% to 60% EtOAc in pentane was used as eluant for column chromatography giving **23** (97%) as an oil. <sup>1</sup>H NMR (400 MHz, CDCl<sub>3</sub>) δ (ppm) 7.53–7.60 (m, 4H), 7.32–7.43 (m, 6H), 7.20 (dt, *J* = 8.4, 2.8 Hz, 2H), 6.86 (dt, *J* = 8.4, 2.8 Hz, 2H), 4.38 (s, 2H), 3.79 (s, 3H), 3.36–3.50 (m, 2H), 2.87 (d, *J* = 10 Hz, 1H), 1.87–2.04 (m, 2H), 1.59–1.80 (m, 2H), 1.01 (s, 9H), 0.63 (s, 3H). <sup>13</sup>C NMR (100 MHz, CDCl<sub>3</sub>) δ (ppm) 158.9, 134.9 (2C), 134.8 (2C), 134.5, 134.4, 130.7, 129.6, 129.5, 129.0 (2C), 127.93 (2C), 127.91 (2C), 113.6 (2C), 72.2, 69.4, 56.1, 55.1, 46.5, 29.9, 27.4, 22.5 (3C), –5.2. HRMS C<sub>29</sub>H<sub>39</sub>NO<sub>3</sub>SSi [M+Na<sup>+</sup>]; calculated: 532.2318, found: 532.2310.

**(*R*)-*N*-((*R*)-3-(4-Methoxybenzyloxy)-1-(methyldiphenylsilyl)propyl)-2-methylpropane-2-sulfinamide (31).** It was prepared from sulfinimine **78** according to the previous general procedure. Increasing polarity from 25% to 60% EtOAc in pentane was used as eluant for column chromatography giving **31** (87%) as a colourless wax. <sup>1</sup>H NMR (400 MHz, CDCl<sub>3</sub>) δ (ppm) 7.57–7.55 (m, 4H), 7.40–7.33 (m, 6H),

7.23–7.21 (m, 2H), 6.86–6.84 (m, 2H), 4.33 (s, 2H), 3.80 (s, 3H), 3.69 (td,  $J = 8.8, 4.8$  Hz, 1H), 3.65–3.60 (m, 2H), 3.39 (d,  $J = 8.8$  Hz, 1H), 2.21–2.13 (m, 1H), 1.81–1.73 (m, 1H), 0.97 (s, 9H), 0.62 (s, 3H).  $^{13}\text{C}$  NMR (100 MHz,  $\text{CDCl}_3$ )  $\delta$  (ppm) 159.2, 135.2 (2C), 135.1 (2C), 134.81, 134.79, 130.8, 129.8 (2C), 129.6 (2C), 128.1 (4C), 113.8 (2C), 72.7, 68.9, 56.3, 55.4, 44.8, 33.1, 22.8 (3C), –4.9. HRMS  $\text{C}_{28}\text{H}_{37}\text{NO}_3\text{SSi}$  [ $\text{M}+\text{Na}^+$ ]; calculated: 518.2161, found: 518.2167.

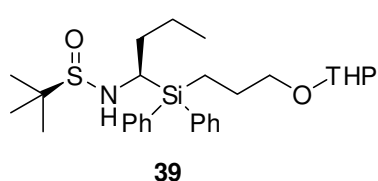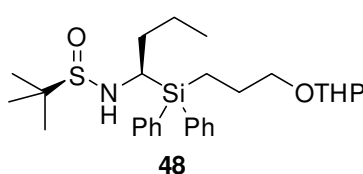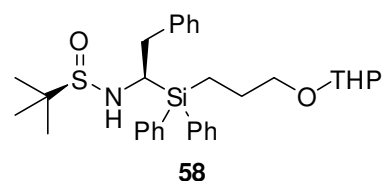

**(R)-N-((1R)-1-{Diphenyl[3-(tetrahydro-2H-pyran-2-yloxy)propyl]silyl}butyl)-2-methylpropane-2-sulfonamide (39).**<sup>10</sup> **General Procedure for the Addition of (Diphenylalkylsilyl)lithium to Sulfinimines.** Diphenyl[3-(tetrahydro-2H-pyran-2-yloxy)propyl]silane<sup>10</sup> (70 mg, 0.21 mmol) was dissolved in dry THF (2 mL) and then freshly cut lithium pieces (15 mg, 2.1 mmol) were added. The mixture was stirred under argon atmosphere for 4 h, by which time the mixture had turned a rich dark brown colour. In a separate flask, the imine **80** (19 mg, 0.11 mmol) was dissolved in dry THF (2 mL) and the solution was cooled to  $-78^\circ\text{C}$ . To this cooled solution was added the silyl lithium reagent (2 mL) dropwise via syringe over 3–5 min. The mixture was stirred at  $-78^\circ\text{C}$  for 18 h, and then quenched via the addition of water. It was poured into water (30 mL) and extracted with EtOAc ( $3 \times 20$  mL). The combined organic portions were dried ( $\text{MgSO}_4$ ), filtered and evaporated *in vacuo*. The pure product was obtained by column chromatography (increasing polarity from 20% to 30% EtOAc in pentane as eluant) which gave **39** (42 mg, 0.084 mmol, 76%) as a colorless oil  $^1\text{H}$  NMR (400 MHz,  $\text{CDCl}_3$ )  $\delta$  (ppm) 7.57–7.53 (m, 4H), 7.44–7.34 (m, 6H), 4.51 (t,  $J = 2.8$  Hz, 1H), 3.84–3.79 (m, 1H), 3.70–3.64 (m, 1H), 3.48–3.38 (m, 2H), 3.56–3.31 (m, 1H), 2.68 (br d,  $J = 10.0$  Hz, 1H), 1.82–1.37 (m, 12H), 1.19–1.14 (m,

2H), 1.04 (s, 9H), 0.88 (t,  $J = 7.2$  Hz, 3H).  $^{13}\text{C}$  NMR (100 MHz,  $\text{CDCl}_3$ )  $\delta$  (ppm) 135.7 (2C), 135.6 (2C), 133.3, 133.1, 129.94, 129.88, 128.2 (2C), 128.1 (2C), 98.9, 70.1, 62.5, 56.6, 46.0, 36.0, 30.9, 25.6, 23.9, 22.8 (3C), 21.0, 19.8, 14.2, 8.4. HRMS  $\text{C}_{28}\text{H}_{43}\text{NO}_3\text{SSi}$   $[\text{M}+\text{Na}^+]$ ; calculated: 524.2631, found: 524.2624.

**(*R*)-*N*-((1*R*)-1-(Diphenyl(3-(tetrahydro-2*H*-pyran-2-yloxy)propyl)silyl)-3-methylbutyl)-2-methylpropane-2-sulfinamide (48).** It was prepared from sulfinimine **46** according to the previous general procedure. The pure product was obtained by column chromatography using 5% to 30% EtOAc in pentane as eluant which gave **48** (99%) as a colorless oil.  $^1\text{H}$  NMR (400 MHz,  $\text{CDCl}_3$ )  $\delta$  (ppm) 7.60–7.50 (m, 4H), 7.44–7.32 (m, 6H), 4.55–4.46 (m, 1H), 3.81 (ddd,  $J = 10.8, 7.6, 3.2$  Hz, 1H), 3.66 (dtd,  $J = 8.8, 7.2, 2.0$  Hz, 1H), 5.53–3.40 (m, 2H), 3.32 (dtd,  $J = 9.6, 6.8, 2.8$  Hz, 1H), 2.56 (d,  $J = 9.6$  Hz, 1H), 2.13–2.02 (m, 1H), 1.85–1.36 (m, 10H), 1.20–1.10 (m, 2H), 1.02 (s, 9H), 0.94 (d,  $J = 6.4$  Hz, 3H), 0.87 (d,  $J = 6.8$  Hz, 3H).  $^{13}\text{C}$  NMR (100 MHz,  $\text{CDCl}_3$ )  $\delta$  (ppm) 135.7 (2C), 135.6 (2C), 133.1, 132.8, 129.91, 128.89, 128.2 (2C), 128.1 (2C), 109.9, 98.9, 70.0, 62.5, 56.6, 43.6, 42.9, 30.8, 25.6, 25.0, 23.9, 22.8 (3C), 21.3, 19.8, 8.3. HRMS  $\text{C}_{29}\text{H}_{45}\text{NO}_3\text{SSi}$   $[\text{M}+\text{Na}^+]$ ; calculated: 538.2782, found: 538.2801.

***S*(*R*)-*N*-((1*R*)-1-{Diphenyl[3-(tetrahydro-2*H*-pyran-2-yloxy)propyl]silyl}-2-phenylethyl)-2-methylpropane-2-sulfinamide (58).** It was prepared from sulfinimine **56** according to the previous general procedure. The pure product was obtained by column chromatography using 10% to 50% EtOAc in pentane as eluant which gave **58** (47%) as a colorless oil.  $^1\text{H}$  NMR (400 MHz,  $\text{CDCl}_3$ )  $\delta$  (ppm) 7.48–7.53 (m, 4H), 7.33–7.42 (m, 5H), 7.15–7.23 (m, 5H), 4.46 (dt,  $J = 5.2, 3.2$  Hz, 1H), 3.76–3.81 (m, 2H), 3.54 (dtd,  $J = 8.0, 6.8, 1.2$  Hz, 1H), 3.43–3.45 (m, 1H), 3.90 (d,  $J = 9.6, 6.8, 4.8$  Hz, 1H), 3.08–3.11 (m, 2H), 3.02 (d,  $J = 8.4$  Hz, 1H), 1.75–1.83 (m, 1H), 1.62–1.69 (m, 1H),

1.40–1.55 (m, 6H), 0.96–1.06 (m, 2H), 1.00 (s, 9H).  $^{13}\text{C}$  NMR (100 MHz,  $\text{CDCl}_3$ )  $\delta$  (ppm) 138.9, 135.6 (4C), 132.9 (2C), 129.8, 129.7, 129.7 (2C), 128.4 (2C), 128.1 (2C), 128.0 (2C), 126.6, 98.7, 69.9, 62.3, 56.6, 46.8, 39.8, 30.8, 25.5, 23.9, 22.6 (3C), 19.7, 8.7. HRMS  $\text{C}_{32}\text{H}_{43}\text{NO}_3\text{SSi}$   $[\text{M}+\text{Na}^+]$ ; calculated: 572.2631, found: 572.2629.

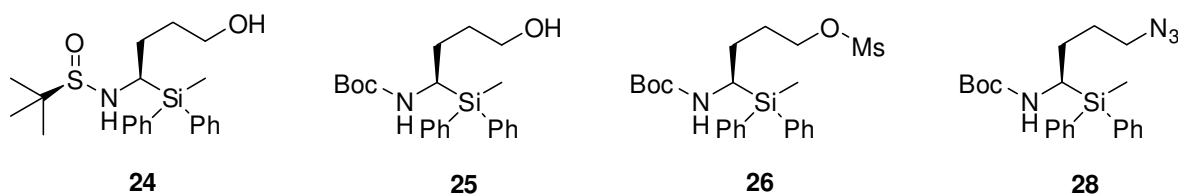

**(R)-N-((R)-4-Hydroxy-1-(methyldiphenylsilyl)butyl)-2-methylpropane-2-sulfinamide (24).** *p*-Methoxybenzyl ether **23** (635 mg, 1.23 mmol) was dissolved in  $\text{CH}_2\text{Cl}_2$  (45 mL), and then water (6 mL) and DDQ (362 mg, 1.55 mmol) were added. The mixture was stirred vigorously at rt for 3 h, then poured into water (50 mL) and extracted with  $\text{CH}_2\text{Cl}_2$  ( $3 \times 40$  mL). The combined organic portions were dried ( $\text{MgSO}_4$ ), filtered and evaporated *in vacuo*. The pure product was obtained by column chromatography (increasing polarity from 1% to 5% MeOH in  $\text{CH}_2\text{Cl}_2$  as eluant) which gave **24** (461 mg, 1.18 mmol, 96%) as a colorless oil.  $^1\text{H}$  NMR (400 MHz,  $\text{CDCl}_3$ )  $\delta$  (ppm) 7.59–7.52 (m, 4H), 7.43–7.33 (m, 6H), 3.63 (dt,  $J = 5.4, 5.4$  Hz, 1H), 3.52 (ddd,  $J = 11.6, 7.2, 4.4$  Hz, 1H), 3.42 (ddd,  $J = 10.0, 8.0, 4.4$  Hz, 1H), 3.07 (d,  $J = 10.0$  Hz, 1H), 2.84 (br s, 1H), 2.05–1.94 (m, 1H), 1.85–1.73 (m, 1H), 1.73–1.61 (m, 2H), 1.02 (s, 9H), 0.62 (s, 3H).  $^{13}\text{C}$  NMR (100 MHz,  $\text{CDCl}_3$ )  $\delta$  (ppm) 135.1 (2C), 134.9 (2C), 134.6, 134.4, 129.8, 129.7, 128.1 (2C), 128.0 (2C), 62.2, 56.4, 47.2, 30.4, 29.7, 22.7 (3C), –5.2. HRMS  $\text{C}_{21}\text{H}_{31}\text{NO}_2\text{SSi}$   $[\text{M}+\text{Na}^+]$ ; calculated: 412.1737, found: 412.1744.

**(R)-tert-Butyl 4-hydroxy-1-(methyldiphenylsilyl)butylcarbamate (25).** Sulfinamide **24** (461 mg, 1.18 mmol) was dissolved in anhydrous HCl in MeOH (20 mL, 0.5 M) and the mixture was stirred at rt for 3 h. All volatiles were removed *in vacuo* giving the crude amino alcohol. The residue was dissolved in dry



CH<sub>2</sub>Cl<sub>2</sub> (15 mL) and then Boc<sub>2</sub>O (250 mg, 1.19 mmol) and NEt<sub>3</sub> (250 mg, 2.50 mmol) were added. The mixture was stirred at rt for 18 h, then poured into water (50 mL) and extracted with CH<sub>2</sub>Cl<sub>2</sub> (3 × 20 mL). The combined organic portions were dried (MgSO<sub>4</sub>), filtered and evaporated in vacuo. The pure product was obtained by column chromatography (increasing polarity from 10% to 50% EtOAc in pentane as eluant) which gave **25** (434 mg, 1.13 mmol, 95%) as a colorless oil. <sup>1</sup>H NMR (400 MHz, CDCl<sub>3</sub>) δ (ppm) 7.57 (dd, *J* = 7.6, 1.6 Hz, 2H), 7.53 (dd, *J* = 7.6, 1.6 Hz, 2H), 7.43–7.33 (m, 6H), 4.32 (d, *J* = 10.0 Hz, 1H), 3.85 (td, *J* = 10.8, 2.8 Hz, 1H), 3.70–3.56 (m, 2H), 1.93 (br s, 1H), 1.76–1.49 (m, 3H), 1.48–1.36 (m, 1H), 1.39 (s, 9H), 0.60 (s, 3H). <sup>13</sup>C NMR (100 MHz, CDCl<sub>3</sub>) δ (ppm) 156.7, 135.1 (2C), 135.0 (2C), 134.5, 134.3, 129.82, 129.76, 128.1 (4C), 79.4, 62.7, 38.6, 29.9, 28.8, 28.5 (3C), –5.5. HRMS C<sub>22</sub>H<sub>31</sub>NO<sub>3</sub>Si [M+Na<sup>+</sup>]; calculated: 408.1965, found: 408.1979.

**(*R*)-4-(*tert*-Butoxycarbonylamino)-4-(methyldiphenylsilyl)butyl methanesulfonate (26).** The alcohol **25** (57 mg, 0.15 mmol) was dissolved in CH<sub>2</sub>Cl<sub>2</sub> (5 mL) and then NEt<sub>3</sub> (30 mg, 0.30 mmol) and MsCl (19 mg, 0.23 mmol) were added. The mixture was stirred at rt for 30 min, then poured into water (50 mL) and extracted with CH<sub>2</sub>Cl<sub>2</sub> (3 × 20 mL). The combined organic portions were dried (MgSO<sub>4</sub>), filtered and evaporated *in vacuo*, giving the crude mesylate **26** that was used without further purification. <sup>1</sup>H NMR (400 MHz, CDCl<sub>3</sub>) δ (ppm) 7.59–7.50 (m, 4H), 7.44–7.32 (m, 6H), 4.30–4.20 (m, 2H), 3.84–3.74 (m, 1H), 3.65 (br s, 1H), 2.92 (s, 3H), 1.94–1.80 (m, 1H), 1.80–1.67 (m, 2H), 1.47–1.34 (m, 1H), 1.38 (s, 9H), 0.60 (s, 3H). <sup>13</sup>C NMR (100 MHz, CDCl<sub>3</sub>) δ (ppm) 156.5, 135.0 (2C), 134.9 (2C), 134.1, 134.0, 129.95, 129.89, 128.2 (4C), 79.4, 69.9, 37.9, 37.2, 28.4 (3C), 27.8, 26.6, –5.7. HRMS C<sub>23</sub>H<sub>33</sub>NO<sub>5</sub>SSi [M+Na<sup>+</sup>]; calculated: 486.1741, found: 486.1754.

**(*R*)-*tert*-Butyl 4-azido-1-(methyldiphenylsilyl)butylcarbamate (28).** Mesylate **26** (68 mg, 0.15 mmol) was dissolved in DMF (3 mL) and then NaN<sub>3</sub> (165 mg, 2.54 mmol) was added. The mixture was stirred at rt for 18 h, then poured into water (50 mL) and extracted with EtOAc (3 × 50 mL). The organic

portion was dried ( $\text{MgSO}_4$ ), filtered and evaporated *in vacuo*. The pure product was obtained by column chromatography (increasing polarity from 5% to 10% EtOAc in pentane as eluant) which gave **28** (47 mg, 0.114 mmol, 77%) as a colorless oil.  $^1\text{H}$  NMR (400 MHz,  $\text{CDCl}_3$ )  $\delta$  (ppm) 7.60–7.52 (m, 4H), 7.44–7.34 (m, 6H), 4.24 (d,  $J = 10.4$  Hz, 1H), 3.81 (td,  $J = 11.2, 2.0$  Hz, 1H), 3.35–3.20 (m, 2H), 1.76–1.56 (m, 3H), 1.50–1.35 (m, 1H), 1.40 (s, 9H), 0.61 (s, 3H).  $^{13}\text{C}$  NMR (100 MHz,  $\text{CDCl}_3$ )  $\delta$  (ppm) 156.4, 135.1 (2C), 135.0 (2C), 134.4, 134.1, 129.92, 129.86, 128.2 (4C), 79.3, 51.1, 38.3, 29.2, 28.5 (3C), 26.5, –5.6. HRMS  $\text{C}_{22}\text{H}_{30}\text{N}_4\text{O}_2\text{Si}$  [ $\text{M}+\text{Na}^+$ ]; calculated: 433.2030, found: 433.2034.

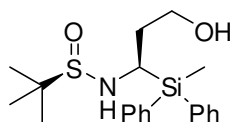**32**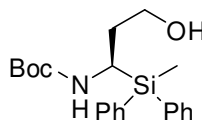**33**

**(R)-N-((R)-3-Hydroxy-1-(methyldiphenylsilyl)propyl)-2-methylpropane-2-sulfinamide (32).** A solution of DDQ (996 mg, 4.29 mmol) in  $\text{CH}_2\text{Cl}_2$  (10 mL) and water (1 mL, 55.0 mmol) was cooled to 0 °C. Compound **31** (532 mg, 1.07 mmol) was dissolved in  $\text{CH}_2\text{Cl}_2$  (1 mL) and added to the stirred solution. After 1 h the reaction mixture was allowed to warm up to rt and the stirring continued for 3 h. Then the reaction was quenched with water (10 mL) and extracted with  $\text{CH}_2\text{Cl}_2$  ( $3 \times 30$  mL). The combined organic portions were washed with sat  $\text{NaHCO}_3$ , dried ( $\text{MgSO}_4$ ), filtered and evaporated *in vacuo*. The pure product was obtained by column chromatography (increasing polarity from 0:2:1 to 4:96:0 MeOH:EtOAc:pentane as eluant), which gave **32** (385 mg, 1.03 mmol, 96%) as a redish wax.  $^1\text{H}$  NMR (400 MHz,  $\text{CDCl}_3$ )  $\delta$  (ppm) 7.57–7.54 (m, 4H), 7.43–7.34 (m, 6H), 4.03 (t,  $J = 6.6$  Hz, 1H), 3.79 (q,  $J = 6.0$  Hz, 2H), 3.63 (ddd,  $J = 11.6, 8.8, 3.2$  Hz, 1H), 3.07 (d,  $J = 9.2$  Hz, 1H), 2.02–1.94 (m, 1H), 1.67–1.59 (m, 1H), 1.03 (s, 9H), 0.61 (s, 3H).  $^{13}\text{C}$  NMR (100 MHz,  $\text{CDCl}_3$ )  $\delta$  (ppm) 135.2 (2C), 135.1

(2C), 134.4, 134.2, 129.91, 129.87, 128.2 (4C), 60.8, 56.4, 45.3, 34.7, 22.8 (3C), -5.5. HRMS  $C_{20}H_{29}NO_2SSi$   $[M+Na^+]$ ; calculated: 398.1586, found: 398.1578.

**(R)-tert-Butyl 3-hydroxy-1-(methyldiphenylsilyl)propylcarbamate (33).** Sulfonamide **32** (51 mg, 0.14 mmol) was dissolved in anhydrous 0.5 M HCl in MeOH (4 mL) and the mixture was stirred at rt for 5 h. All volatiles were removed *in vacuo* to give the crude amine as its hydrochloride. This was dissolved in THF (2 mL) and then  $NEt_3$  (0.1 mL, 73 mg, 0.721 mmol) and  $Boc_2O$  (104 mg, 0.48 mmol) were added. The mixture was stirred at rt for 22 h, and then 2 M NaOH (10 mL) was added. The mixture was stirred vigorously for a further 1 h. The two phases were separated and the aqueous portion was extracted with  $CH_2Cl_2$  (3  $\times$  20 mL). The combined organic portions were dried ( $MgSO_4$ ), filtered and evaporated *in vacuo*. The pure product was obtained by column chromatography (increasing polarity from 5% to 35% EtOAc in pentane as eluant) which gave **33** (21 mg, 0.06 mmol, 40%) as a pale yellow oil.  $^1H$  NMR (400 MHz,  $CDCl_3$ )  $\delta$  (ppm) 7.57–7.51 (m, 4H), 7.44–7.37 (m, 6H), 4.31 (d,  $J$  = 10.4 Hz, 1H), 3.98 (ddd,  $J$  = 13.2, 10.0, 2.8 Hz, 1H), 3.85 (dd,  $J$  = 10.0, 4.4 Hz, 1H), 3.62–3.51 (m, 2H), 1.85 (dddd,  $J$  = 13.6, 11.2, 5.6, 2.8 Hz, 1H), 1.44–1.35 (m, 1H), 1.41 (s, 9H), 0.61 (s, 3H).  $^{13}C$  NMR (100 MHz,  $CDCl_3$ )  $\delta$  (ppm) 158.5, 135.1 (4C), 134.0, 133.8, 130.1, 130.0, 128.34 (2C), 128.31 (2C), 80.3, 58.2, 34.4, 34.0, 28.4 (3C), -5.3. HRMS  $C_{21}H_{29}NO_3Si$   $[M+Na^+]$ ; calculated: 394.1814, found: 394.1819.

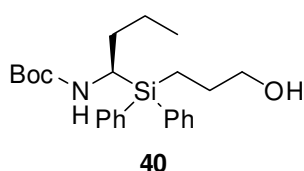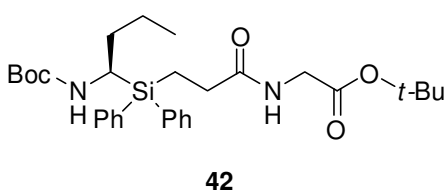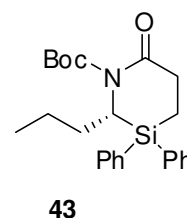

**(R)-tert-Butyl 1-[(3-hydroxypropyl)diphenylsilyl]butylcarbamate (40).** Sulfonamide **39** (424 mg, 0.85 mmol) was dissolved in methanol containing anhyd HCl (50 mL, 0.4 M). The mixture was stirred at rt for 18 h, and all volatiles were removed *in vacuo* which gave the crude amine as its corresponding

HCl salt. Toluene (2 mL) was added and evaporated repeatedly until dryness. The residue was dissolved in CH<sub>2</sub>Cl<sub>2</sub> (60 mL), and triethyl amine (0.18 mL, 1.3 mmol, 1.5 equiv) and di-*tert*-butyldicarbonate (0.55 g, 2.5 mmol, 3 equiv) was added and the reaction stirred at rt for 18 h. Aqueous NaOH (50 mL, 1 M) was added and the mixture stirred for 10 min and then extracted with CH<sub>2</sub>Cl<sub>2</sub> (3 × 50 mL). The combined organic extracts were washed with brine (50 mL), dried (MgSO<sub>4</sub>), and concentrated *in vacuo*. The pure product was obtained by column chromatography (25% ethyl acetate in pentane as eluant) which gave **40** (229 mg, 0.55 mmol, 65%) as a colourless oil. <sup>1</sup>H NMR (400 MHz, CDCl<sub>3</sub>) δ (ppm) 7.58–7.55 (m, 2H), 7.52–7.50 (m, 2H), 7.45–7.35 (m, 6H), 4.14 (br d, *J* = 10.8 Hz, 1H), 3.90 (td, *J* = 10.8, 2.8 Hz, 1H), 3.63–3.51 (m, 2H), 1.64–1.52 (m, 5H), 1.49–1.44 (m, 2H), 1.41 (s, 9H), 1.36–1.06 (m, 2H), 0.87 (t, *J* = 6.8 Hz, 3H). <sup>13</sup>C NMR (100 MHz, CDCl<sub>3</sub>) δ (ppm) 156.5, 135.7 (2C), 135.5 (2C), 133.5, 133.1, 129.9, 129.8, 128.2 (2C), 128.1 (2C), 79.2, 65.4, 37.8, 34.4, 28.5 (3C), 26.9, 20.4, 13.9, 7.5. HRMS (ES) C<sub>24</sub>H<sub>35</sub>NO<sub>3</sub>Si [M+Na<sup>+</sup>]; calcd: 436.2284, found: 436.2277.

**(*R*)-*tert*-Butyl 2,2-dimethyl-4,10-dioxo-7,7-diphenyl-6-propyl-3-oxa-5,11-diaza-7-silatridecan-13-oate (42).** Alcohol **40** (45 mg, 0.11 mmol) was dissolved in a mixture of MeCN, ethyl acetate and H<sub>2</sub>O (1 mL, 2:2:3), and NaIO<sub>4</sub> (95 mg, 0.44 mmol, 4.1 equiv) and RuCl<sub>3</sub> (1 mg) were added. The reaction was stirred at rt for 2 h, and then H<sub>2</sub>O (5 mL) was added. The mixture was extracted with ethyl acetate (2 × 10 mL) and the combined organic extracts were dried (MgSO<sub>4</sub>), filtered and concentrated *in vacuo* to give the crude carboxylic acid. The residue was dissolved in CH<sub>2</sub>Cl<sub>2</sub> (3 mL) and NMM (60 μL, 0.54 mmol, 5 equiv), *tert*-butyl glycinate hydrochloride (18 mg, 0.11 mmol, 1 equiv), HOBt (33 mg, 0.22 mmol, 2 equiv), and EDC·HCl (41 mg, 0.22 mmol, 2 equiv) were added and the reaction stirred at rt for 20 h. H<sub>2</sub>O (15 mL) was added and the mixture extracted with CH<sub>2</sub>Cl<sub>2</sub> (2 × 10 mL). The combined organic extracts were dried (MgSO<sub>4</sub>), filtered and concentrated *in vacuo*. The pure product was obtained by column chromatography (increasing polarity from 10% to 25% ethyl acetate in pentane as eluant)

which gave **42** (37 mg, 0.069 mmol, 63%) as a colourless oil.  $^1\text{H}$  NMR (400 MHz,  $\text{CDCl}_3$ )  $\delta$  (ppm) 7.57–7.54 (m, 2H), 7.51–7.49 (m, 2H), 7.46–7.35 (m 6H), 5.98 (br s, 1H), 4.22 (br d,  $J = 10.4$  Hz, 1H), 3.93–3.90 (m, 1H), 3.87–3.84 (m, 2H), 2.34–2.26 (m, 1H), 2.19–2.11 (m, 1H), 1.61–1.47 (m, 2H), 1.46 (s, 9H), 1.40 (s, 9H), 1.36–1.19 (m, 4H), 0.86 (t,  $J = 6.8$  Hz, 3H).  $^{13}\text{C}$  NMR (100 MHz,  $\text{CDCl}_3$ )  $\delta$  (ppm) 174.0, 169.2, 156.5, 135.6 (2C), 135.5 (2C), 132.8, 132.5, 130.0 (2C), 128.3 (2C), 128.2 (2C), 82.3, 79.2, 42.2, 37.6, 34.2, 30.4, 28.5 (3C), 28.2 (3C), 20.4, 13.9, 7.4. HRMS (ES)  $\text{C}_{30}\text{H}_{44}\text{N}_2\text{O}_5\text{Si}$  [ $\text{M}+\text{Na}^+$ ]; calcd: 563.2917, found: 563.2916.

**(R)-tert-Butyl 6-oxo-3,3-diphenyl-2-propyl-1,3-azasilinane-1-carboxylate (43).** Alcohol **40** (45 mg, 0.11 mmol) was dissolved in acetone and cooled to 0 ° C. Aqueous  $\text{H}_2\text{Cr}_2\text{O}_7$  (0.32 mL, 0.5 M, 0.16 mmol) was added and the reaction stirred at 0 °C for 2 h. Excess oxidant was quenched by addition of 2-propanol and the mixture filtered through celite. Solvents were removed *in vacuo* and the residue dissolved in  $\text{CH}_2\text{Cl}_2$  (20 mL) and washed successively with  $\text{H}_2\text{O}$  (10 mL) and brine (10 mL), dried ( $\text{MgSO}_4$ ), filtered and concentrated *in vacuo*. The crude product was reacted with NMM (60  $\mu\text{L}$ , 0.54 mmol), *tert*-butyl glycinate hydrochloride (18 mg, 0.11 mmol), HOBT (33 mg, 0.22 mmol), and EDC·HCl (41 mg, 0.22 mmol) and the reaction stirred at rt for 20 h. The pure product was obtained by column chromatography (increasing polarity from 10% to 25% ethyl acetate in pentane) which gave amide **42** (34 mg, 0.062 mmol, 58%) and **43** (7.3 mg, 0.017 mmol, 17%).  $^1\text{H}$  NMR (400 MHz,  $\text{CDCl}_3$ )  $\delta$  (ppm) 7.56–7.52 (m, 4H), 7.48–7.34 (m, 6H), 4.49 (dd,  $J = 10.0, 5.6$  Hz, 1H), 2.98 (ddd,  $J = 15.6, 6.0, 3.6$  Hz, 1H), 2.84 (ddd,  $J = 15.6, 14.4, 5.6$  Hz, 1H), 1.69 (ddd,  $J = 15.6, 5.6, 3.6$  Hz, 1H), 1.57–1.51 (m, 1H), 1.48 (s, 9H), 1.45–1.32 (m, 3H), 1.26–1.15 (m, 1H), 0.76 (t,  $J = 6.0$  Hz, 3H).  $^{13}\text{C}$  NMR (100 MHz,  $\text{CDCl}_3$ )  $\delta$  (ppm) 174.9, 154.1, 135.3 (2C), 134.7 (2C), 134.0, 132.5, 130.5, 130.2, 128.4 (2C), 128.3 (2C), 82.8, 44.1, 35.6, 34.5, 28.1 (3C), 20.9, 14.0, 5.6. HRMS (ES)  $\text{C}_{24}\text{H}_{31}\text{NO}_3\text{Si}$  [ $\text{M}+\text{Na}^+$ ]; calcd: 432.1971, found: 432.1966.

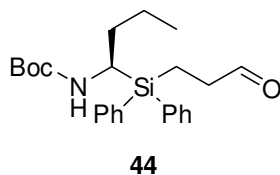

**(*R*)-tert-Butyl 1-[(3-oxo-propyl)-di-phenyl-silyl]-butyl-carbamate (44).** Alcohol **40** (43 mg, 0.10 mmol) was dissolved in CH<sub>2</sub>Cl<sub>2</sub> (0.5 mL) and TEMPO (approx. 1 mg, 3 μmol), H<sub>2</sub>O (0.3 mL), sat aqueous NaHCO<sub>3</sub> (0.9 mL), potassium bromide (approx. 1 mg, 0.01 mmol), and TBAB (approx. 2 mg, 0.5 μmol) were added. The mixture was cooled to 0 °C and aqueous NaOCl (0.16 mL, 15 vol%, 0.31 mmol) was added dropwise. The reaction was stirred at rt for 1.5 h and after addition of a few drops of methanol it was stirred for 5 min. The solution was acidified by dropwise addition of concd HCl and extracted with CH<sub>2</sub>Cl<sub>2</sub> (3 × 20 mL), and the combined organic extracts were dried over anhyd MgSO<sub>4</sub> and concentrated *in vacuo*.<sup>13</sup> The title compound was obtained with a minor impurity of the starting material. <sup>1</sup>H NMR (400 MHz, CDCl<sub>3</sub>) δ (ppm) 9.70 (s, 1H), 7.58–7.38 (m, 10H), 4.15 (br d, *J* = 11.2 Hz, 1H), 3.93 (td, *J* = 11.2, 2.8 Hz, 1H), 2.51 (d<sub>AB</sub>dd, *J*<sub>AB</sub> = 17.2 Hz, *J* = 11.6, 4.8 Hz, 1H), 2.39 (d<sub>AB</sub>dd, *J*<sub>AB</sub> = 17.2 Hz, *J* = 11.2, 5.2 Hz, 1H), 1.50–1.45 (m, 3H), 1.41 (s, 9H), 1.39–1.12 (m, 3H), 0.88 (t, *J* = 6.8 Hz, 3H). <sup>13</sup>C NMR (100 MHz, CDCl<sub>3</sub>) δ (ppm) 202.2, 135.5 (2C), 135.3 (2C), 135.1, 134.5, 130.0, 129.7, 128.2, 128.0, 79.1, 38.0, 37.4, 34.2, 28.4 (3C), 20.2, 13.7, 3.2.

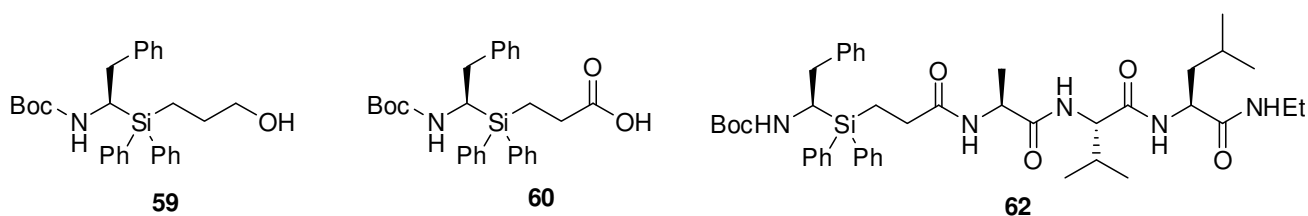

**(*R*)-tert-Butyl 1-[(3-hydroxypropyl)diphenylsilyl]-2-phenylethylcarbamate (59).** Sulfonamide **58** (110 mg, 0.20 mmol) was dissolved in anhydrous 0.5 M HCl in MeOH (5 mL) and the mixture was stirred at rt for 18 h. All volatiles were removed *in vacuo* to give the crude amine as its hydrochloride

salt. This was dissolved in CH<sub>2</sub>Cl<sub>2</sub> (4 mL) and then NEt<sub>3</sub> (137  $\mu$ L, 0.98 mmol) and Boc<sub>2</sub>O (86 mg, 0.40 mmol) were added. The mixture was stirred at rt for 18 h, and the 2 M NaOH (5 mL) was added. The mixture was stirred vigorously for a further 2 h. The two phases were separated and the aqueous portion was extracted with CH<sub>2</sub>Cl<sub>2</sub> (3  $\times$  20 mL). The combined organic portions were dried (MgSO<sub>4</sub>), filtered and evaporated *in vacuo*. The pure product was obtained by column chromatography (increasing polarity from 10% to 40% EtOAc in pentane as eluant), which gave **59** (68 mg, 0.15 mmol, 74%) as a colorless gum. <sup>1</sup>H NMR (400 MHz, CDCl<sub>3</sub>)  $\delta$  (ppm) major rotamer 7.62–7.57 (m, 4H), 7.39 (m, 7H), 7.25–7.22 (m, 2H), 7.17–7.15 (m, 3H), 4.25–4.20 (m, 1H), 3.59–3.48 (m, 2H), 3.01–2.97 (m, 1H), 2.53 (dd, *J* = 14.0, 10.0 Hz, 1H), 1.85 (br s, 1H), 1.64–1.51 (m, 2H), 1.28 (s, 9H), 1.20–1.05 (m, 2H). Minor rotamer *inter alia* 5.73 (d, *J* = 10.4 Hz, 1H), 4.20 (d, *J* = 7.2 Hz, 1H), 1.10 (s, 9H). <sup>13</sup>C NMR (100 MHz, CDCl<sub>3</sub>)  $\delta$  (ppm) 156.0, 139.5, 135.7 (2C), 135.5 (2C), 133.3, 132.9, 130.0 (2C), 129.1 (2C), 128.3 (4C), 128.2 (2C), 126.2, 79.3, 65.3, 39.5, 38.3, 28.4 (3C), 26.9, 7.6. HRMS C<sub>28</sub>H<sub>35</sub>NO<sub>3</sub>Si [M+Na<sup>+</sup>]; calculated: 484.2278, found: 484.2278.

**(*R*)-3-((1-(*tert*-Butoxycarbonylamino)-2-phenylethyl)diphenylsilyl)propanoic acid (60).** Alcohol **59** (61 mg, 0.13 mmol) was dissolved in a mixture of H<sub>2</sub>O, MeCN and CCl<sub>4</sub> (3.5 mL, 3:2:2). NaIO<sub>4</sub> (113 mg, 0.53 mmol) and RuCl<sub>3</sub> (2 mg, 0.01 mmol) were added and the reaction was stirred under air at rt for 2 h. The reaction mixture was diluted with H<sub>2</sub>O (5 mL) and extracted with EtOAc (2  $\times$  10 mL), and then the combined organic portions were dried (MgSO<sub>4</sub>), filtered and concentrated *in vacuo*. The obtained crude mixture of title compound **60** was used in the following step without further purification or characterization.

***tert*-Butyl (5*S*,8*S*,11*S*,17*R*)-5-isobutyl-8-isopropyl-11-methyl-4,7,10,13-tetraoxo-16,16,18-triphenyl-3,6,9,12-tetraaza-16-silaoctadecan-17-ylcarbamate (62).** Trifluoroacetic acid (4 mL) was added to a solution of *N*-Boc-L-alanyl-L-isoleucyl-L-leucinamide **61** (88 mg, 0.20 mmol) in CH<sub>2</sub>Cl<sub>2</sub> (4 mL).

The mixture was stirred at rt for 1 h and then the solvents were evaporated *in vacuo*. The residue was redissolved in CH<sub>2</sub>Cl<sub>2</sub> (4 mL) and the solvent was evaporated *in vacuo*, giving the crude trifluoroacetate ammonium salt as a colorless gum. The crude material was redissolved in CH<sub>2</sub>Cl<sub>2</sub> (3 mL) and *N*-methyl morpholine (73  $\mu$ L, 0.66 mmol), carboxylic acid **60** (0.13 mmol), HOBt (41 mg, 0.26 mmol) and EDC (51 mg, 0.26 mmol) were added. The mixture was stirred at rt for 3 days and then poured into water (10 mL). The aqueous phase was extracted with CH<sub>2</sub>Cl<sub>2</sub> (3  $\times$  10 mL) and the combined organic portions were dried (MgSO<sub>4</sub>), filtered and evaporated *in vacuo*. The pure product was obtained by column chromatography (increasing polarity from 40% to 80% EtOAc in CH<sub>2</sub>Cl<sub>2</sub> as eluant), which gave **62** (63 mg, 0.078 mmol, 59%) as a colorless solid. <sup>1</sup>H NMR (400 MHz, CD<sub>3</sub>OD)  $\delta$  (ppm) major rotamer 7.58–7.65 (m, 4H), 7.37–7.47 (m, 6H), 7.10–7.22 (m, 5H), 6.23 (d, *J* = 10.4 Hz, 1H), 4.35 (dd, *J* = 9.6, 5.2 Hz, 1H), 4.26 (q, *J* = 6.8 Hz, 1H), 4.15 (d, *J* = 7.2 Hz, 1H), 4.01–4.08 (m, 1H), 3.19 (q, *J* = 7.2 Hz, 2H), 2.87 (dd, *J* = 14.4, 3.6 Hz, 1H), 2.59 (dd, *J* = 14.0, 12.2 Hz, 1H), 2.27–2.31 (m, 2H), 1.81–1.88 (m, 1H), 1.46–1.66 (m, 6H), 1.29 (d, *J* = 7.2 Hz, 3H), 1.25 (s, 9H), 1.14–1.23 (m, 1H), 1.11 (t, *J* = 6.8 Hz, 3H), 0.88–0.93 (m, 12H). Minor rotamer *inter alia* 5.73 (d, *J* = 10.4 Hz, 1H), 4.20 (d, *J* = 7.2 Hz, 1H), 1.10 (s, 9H). <sup>13</sup>C NMR (100 MHz, CDCl<sub>3</sub>)  $\delta$  (ppm) 173.8, 173.1, 171.9, 171.5, 155.8, 139.4, 135.54 (2C), 135.48 (2C), 132.8, 132.7, 130.0 (2C), 129.1 (2C), 128.3 (4C), 128.2 (2C), 126.2, 79.0, 57.9, 51.7, 48.7, 41.4, 39.6, 38.2, 34.3, 29.9, 28.4 (3C), 28.0, 25.4, 25.1, 22.9, 22.5, 20.1, 15.4, 14.7, 11.7, 7.1. HRMS C<sub>45</sub>H<sub>65</sub>N<sub>5</sub>O<sub>6</sub>Si [M+Na<sup>+</sup>]; calculated: 822.4596, found: 822.4604.

#### Additional references:

- (1) Cordero, F. M.; Pisaneschi, F.; Gensini, M.; Goti, A.; Brandi, A. *Eur. J. Org. Chem.* **2002**, 1941–1951.
- (2) Thang, T. P.; Volkman, S. K.; Ellman, J. A. *J. Org. Chem.* **2001**, 66, 8772–8778.
- (3) Marshall, J. A.; Trometer, J. D.; Blough, B. E.; Crute, T. D. *J. Org. Chem.* **1988**, 53, 4274–4282.



- (4) Fernández, R. A.; Bodas, M. S.; Kumar, P. *Tetrahedron* **2002**, 58, 1223–1227.
- (5) Evans, J. W.; Ellman, J. A. *J. Org. Chem.* **2003**, 68, 9948–9957.
- (6) Chiacchio, U.; Corsaro, A.; Gumina, G.; Rescifina, A.; Iannazzo, D.; Piperno, A.; Romeo, G.; Romeo, R. *J. Org. Chem.* **1999**, 64, 9321–9327.
- (7) Marshall, A.; Shearer, B. G.; Grooks, S. L. *J. Org. Chem.* **1987**, 52, 1236–1245.
- (8) Staas, D. D.; Savage, K. L.; Homnick, C. F.; Tsou, N. N.; Ball, R. G. *J. Org. Chem.* **2002**, 67, 8276–8279.
- (9) Huang, Z.; Zhang, M.; Wang, Y.; Qin, Y. *Synlett* 2005, 8, 1334–1336.
- (10) Nielsen, L.; Lindsay, K. B.; Faber, J.; Nielsen, N. C.; Skrydstrup, T. *J. Org. Chem.* **2007**, 72, 10035–10044.
- (11) Onoda, T.; Shirai, R.; Koiso, Y.; Iwasaki, S. *Tetrahedron* **1996**, 52, 14543–14562.
- (12) Chemla, F.; Ferreira, F. *J. Org. Chem.* **2004**, 69, 8244–8250.
- (13) Nooy, A. E. J. d.; Besemer, A. C.; van Bakkum, H. *Synthesis* **1996**, 1153.

S22

KB40

Archive directory: /export/home/auto/vnmrsys/data  
Sample directory:

Pulse Sequence: s2pul

Solvent: CDCl3

Temp. 26.0 C / 299.1 K

File: KB40H

Mercury-400BB "merc400"

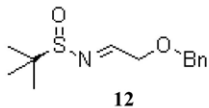

Relax. delay 1.000 sec  
Pulse 45.0 degrees  
Acq. time 1.994 sec  
Width 6410.3 Hz  
8 repetitions  
OBSERVE H1, 400.4698269 MHz  
DATA PROCESSING  
FT size 65536  
Total time 0 min, 25 sec

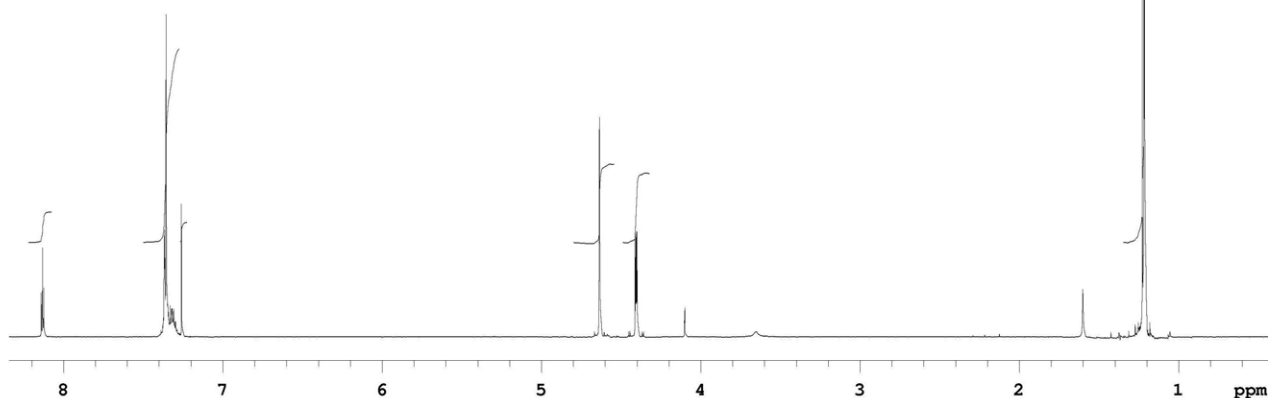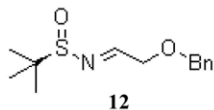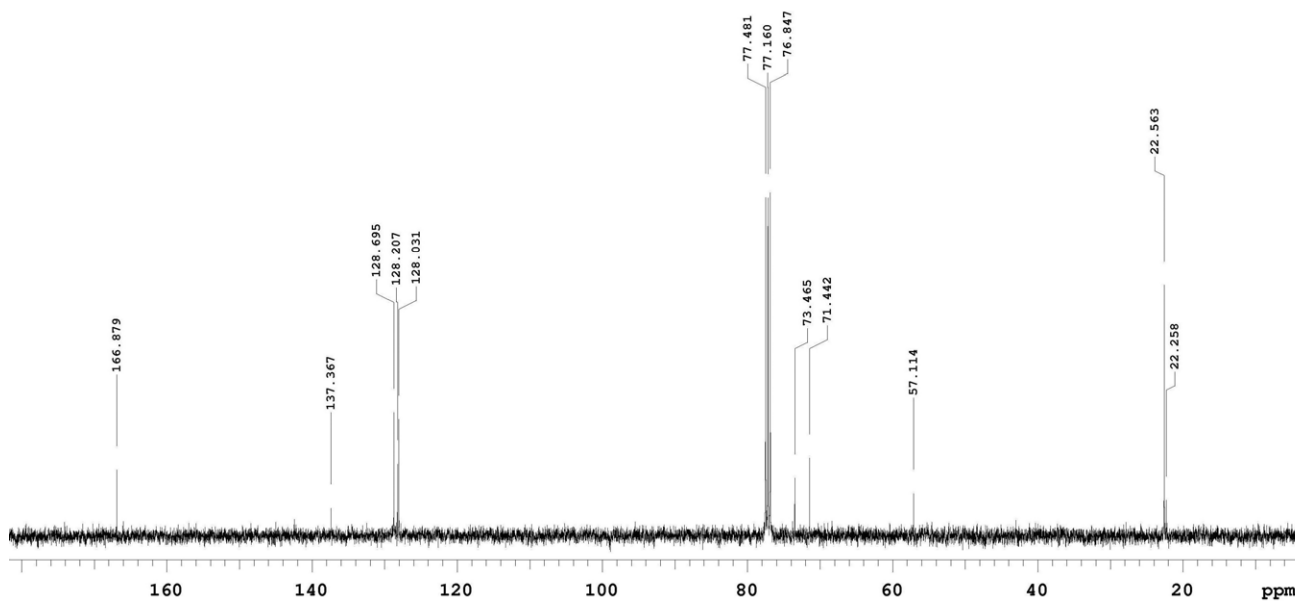

## S23

KB13H

Archive directory: /export/home/auto/vnmrsys/data  
Sample directory:

Pulse Sequence: s2pul

Solvent: CDCl<sub>3</sub>

Temp. 26.0 C / 299.1 K

File: KB13H2

Mercury-400BB "merc400"

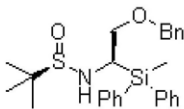

13

Relax. delay 1.000 sec  
Pulse 45.0 degrees  
Acq. time 1.994 sec  
Width 6410.3 Hz  
8 repetitions  
OBSERVE H1, 400.4698269 MHz  
DATA PROCESSING  
FT size 65536  
Total time 0 min, 25 sec

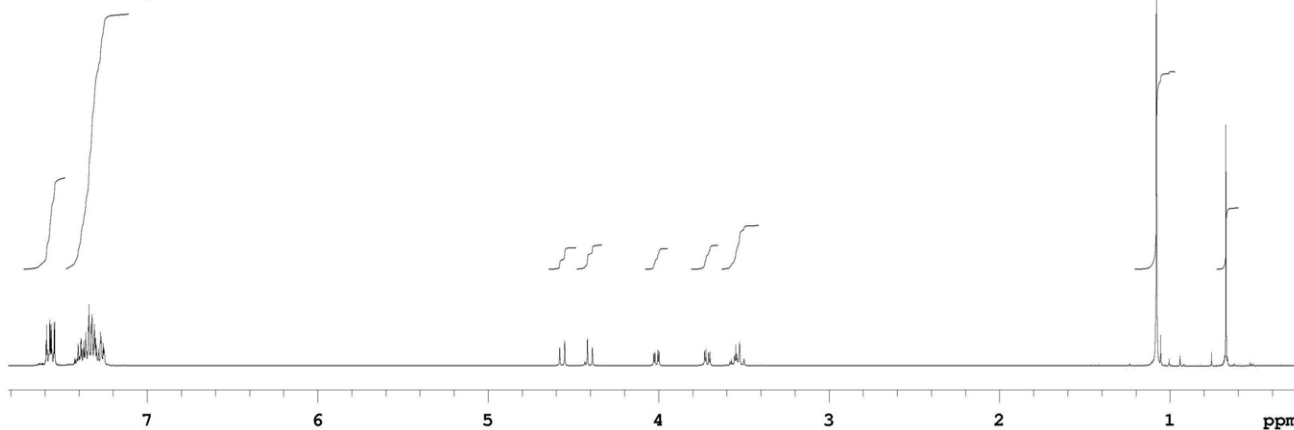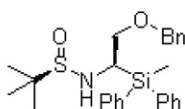

13

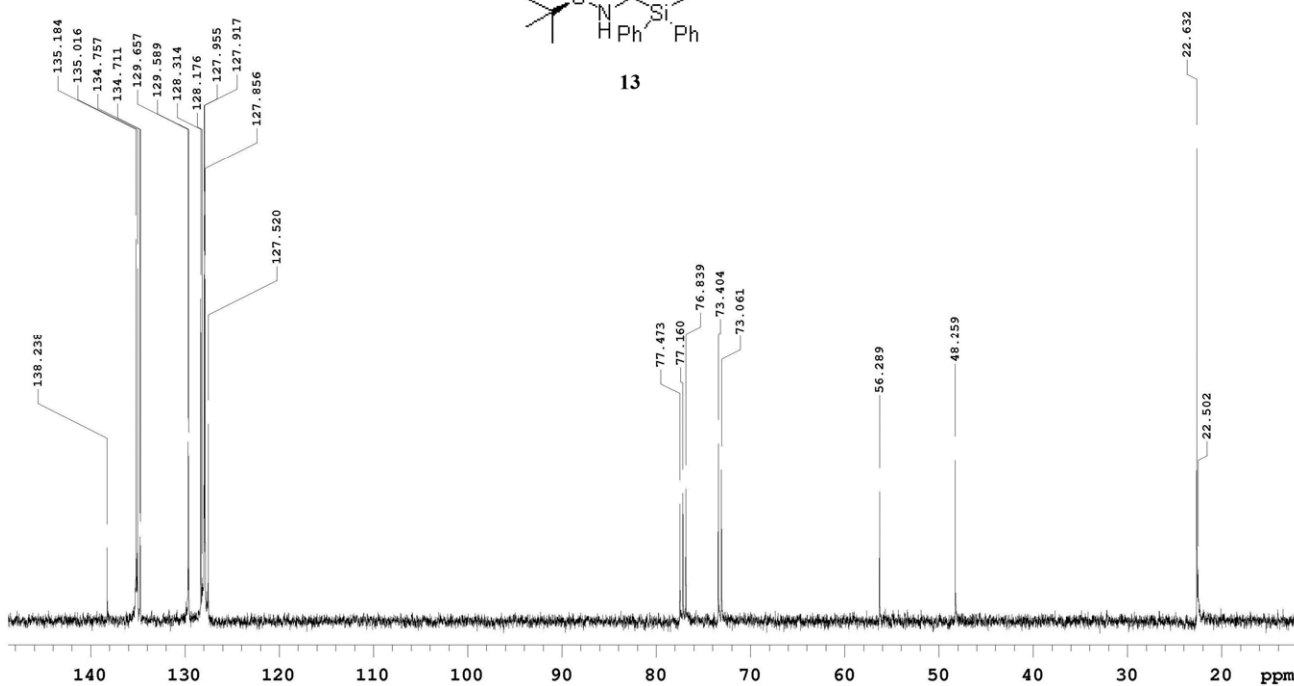

S24

RM1.11\_column\_f38-47\_1H

Archive directory: /export/home/auto/vnmrsys/data  
Sample directory:

Pulse Sequence: s2pul

Solvent: CDCl<sub>3</sub>  
Temp. 26.0 C / 299.1 K  
File: RM1.11\_column\_f38-47\_1H  
Mercury-400BB "merc400"

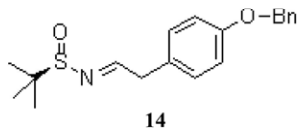

Relax. delay 1.000 sec  
Pulse 45.0 degrees  
Acq. time 1.994 sec  
Width 6410.3 Hz  
8 repetitions  
OBSERVE H1, 400.4698269 MHz  
DATA PROCESSING  
FT size 32768  
Total time 0 min, 25 sec

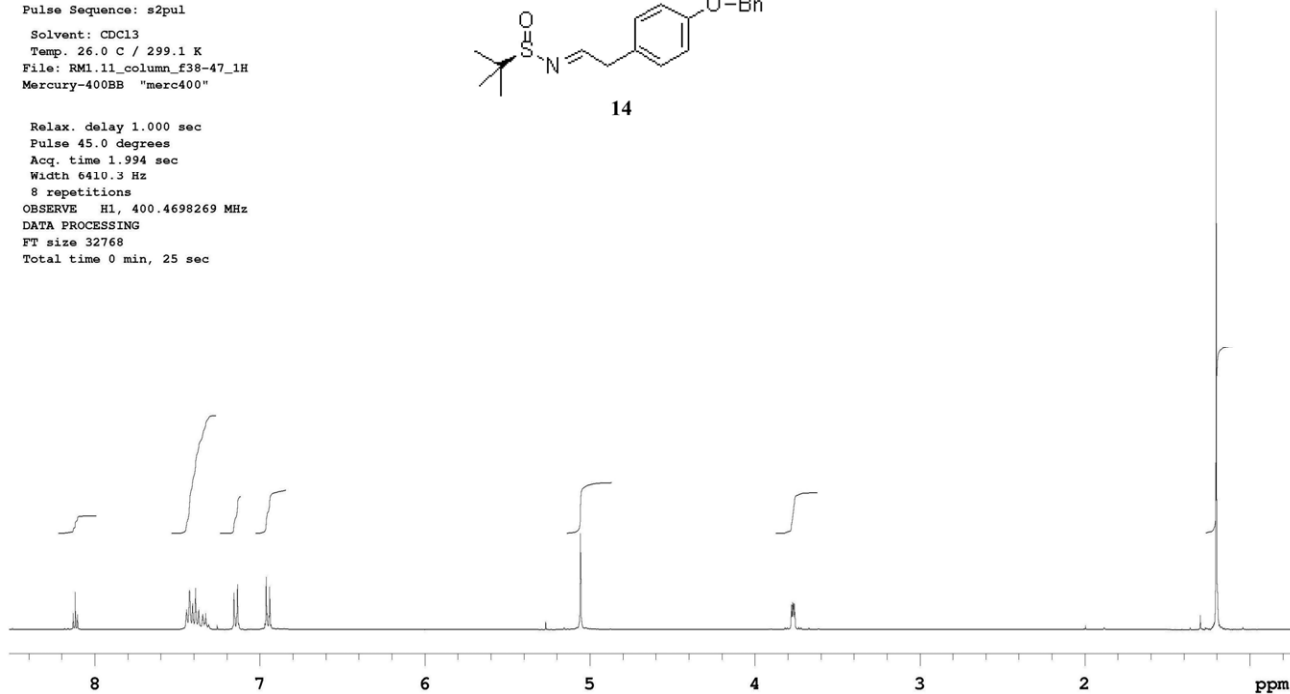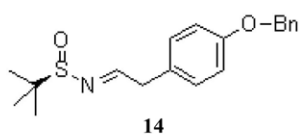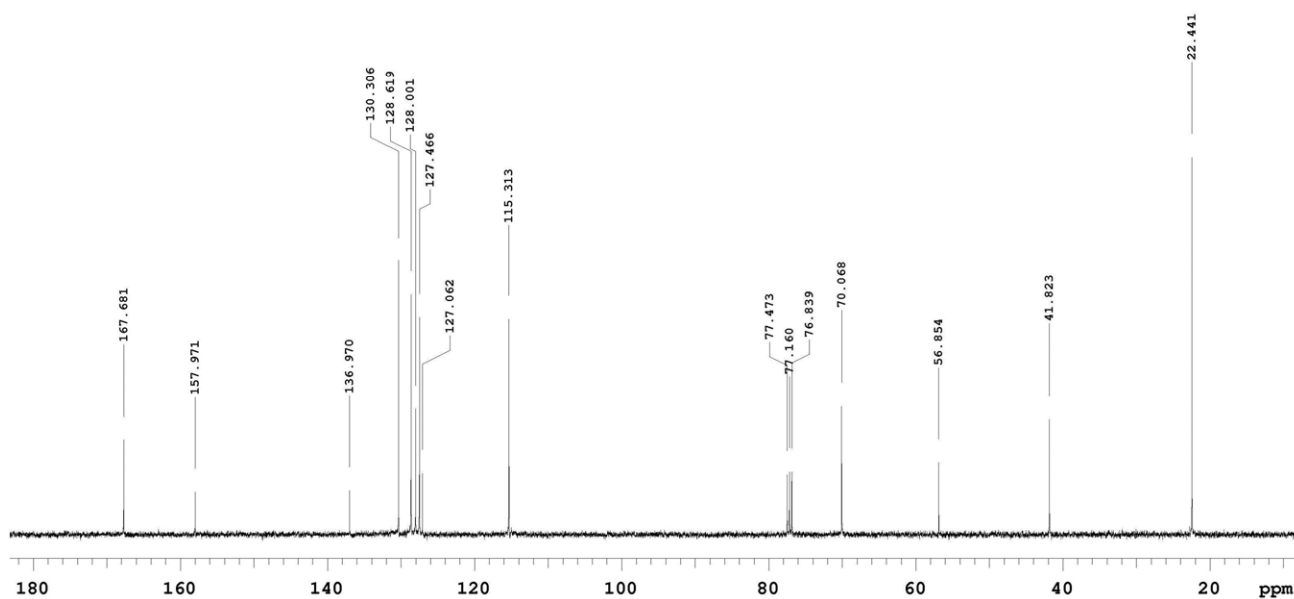

S25

RM1.12\_column\_f22-34\_1H

Archive directory: /export/home/auto/vnmrsvs/data  
Sample directory:

Pulse Sequence: s2pul

Solvent: CDCl3

Temp. 26.0 C / 299.1 K

File: RM1.12\_column\_f22-34\_1H

Mercury-400BB "merc400"

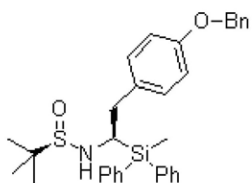

15

Relax. delay 1.000 sec  
Pulse 45.0 degrees  
Acq. time 1.994 sec  
Width 6410.3 Hz  
8 repetitions  
OBSERVE H1, 400.4698269 MHz  
DATA PROCESSING  
FT size 32768  
Total time 0 min, 25 sec

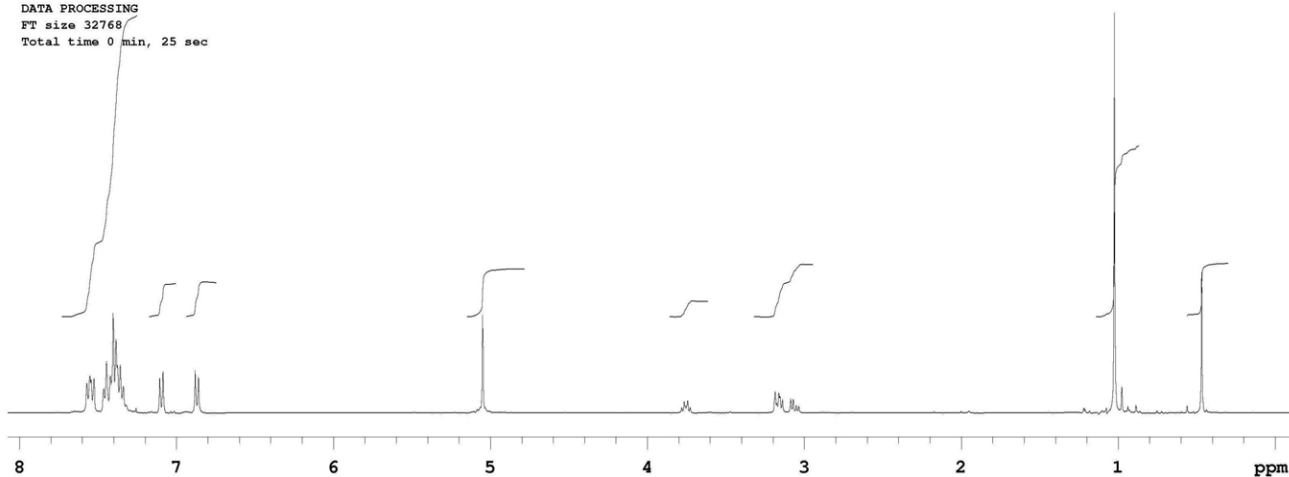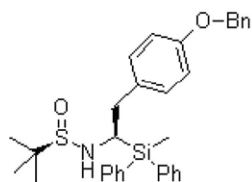

15

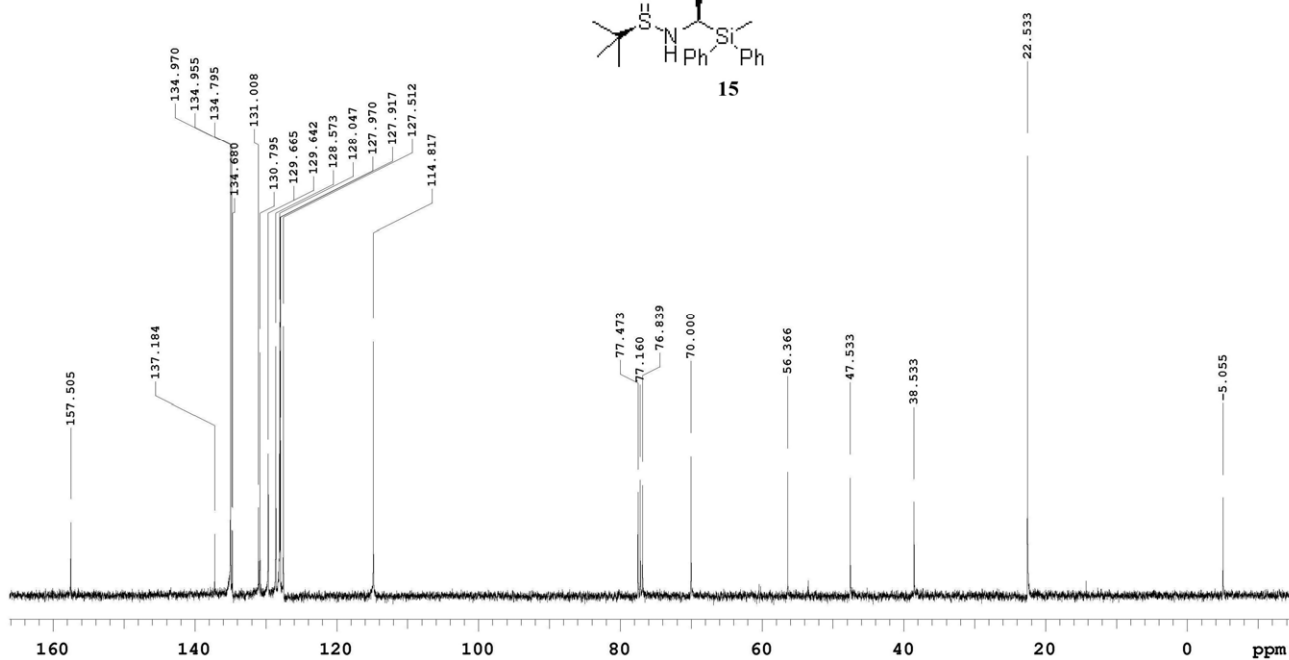

RM1.23\_column\_1H

Archive directory: /export/home/auto/vnmrsys/data  
Sample directory:

Pulse Sequence: s2pul

Solvent: CDCl<sub>3</sub>

Temp. 26.0 C / 299.1 K

File: RM1.23\_column\_1H

Mercury-400BB "merc400"

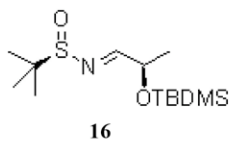Relax. delay 1.000 sec  
Pulse 45.0 degrees  
Acq. time 1.994 sec  
Width 6410.3 Hz  
8 repetitions  
OBSERVE H1, 400.4698269 MHz  
DATA PROCESSING  
FT size 32768  
Total time 0 min, 25 sec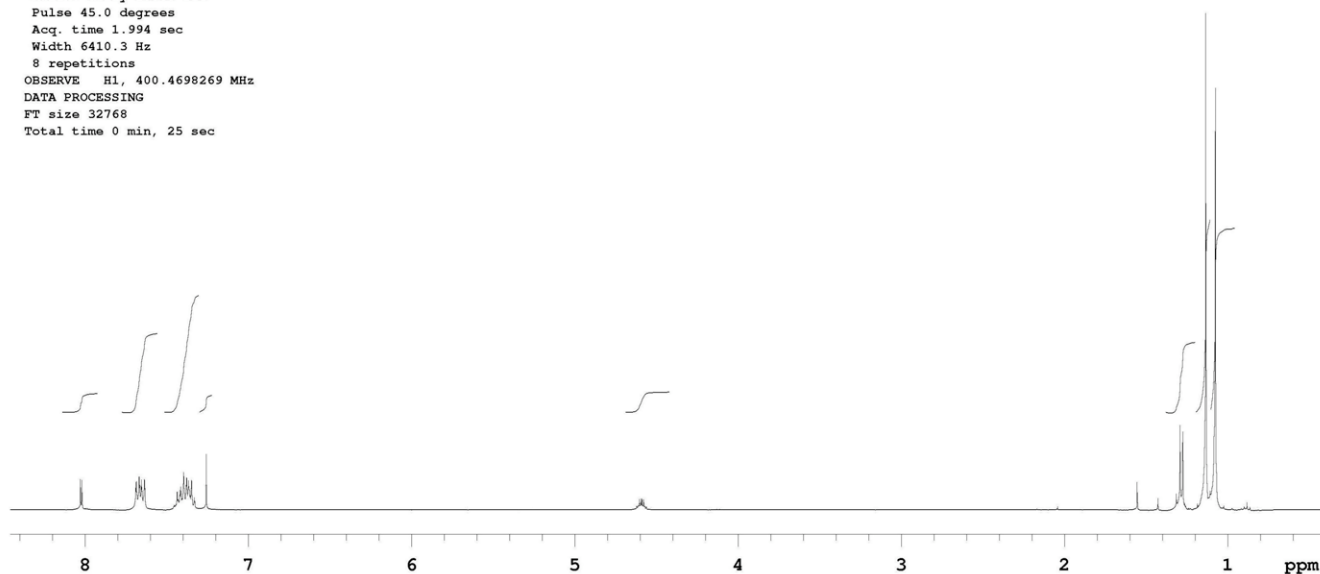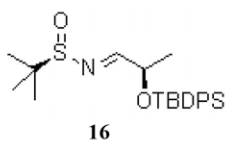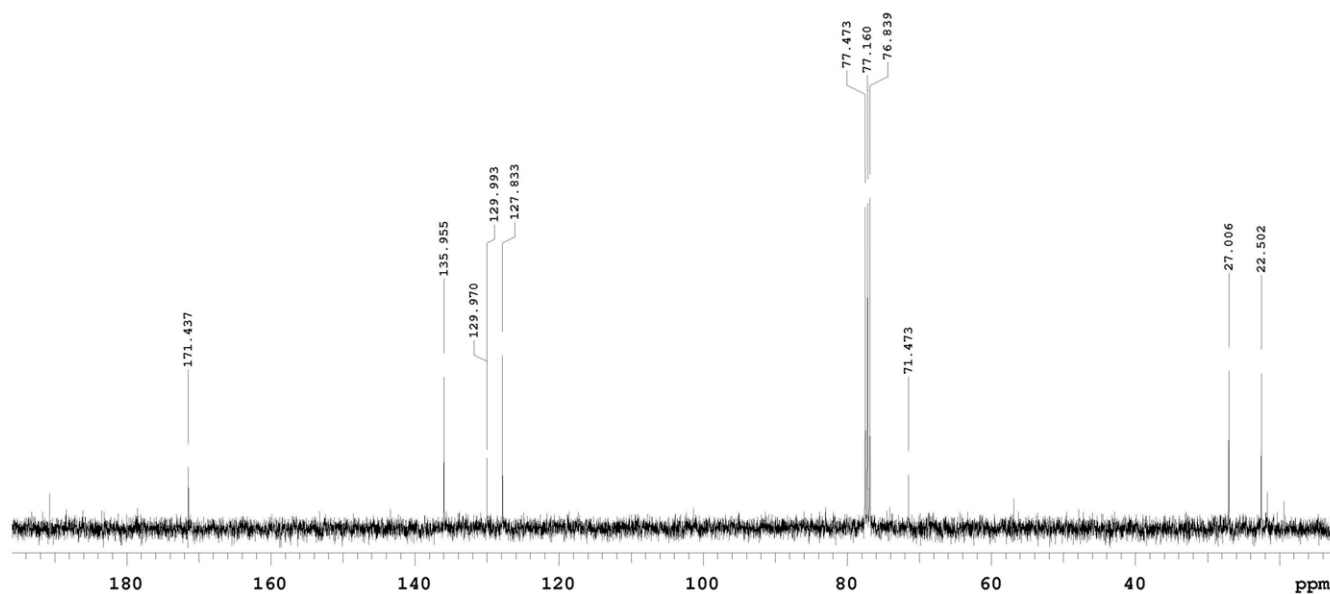

RM1.24\_column(2)\_f20-22\_1H

Archive directory: /export/home/auto/vnmrsys/data  
Sample directory:

Pulse Sequence: s2pul

Solvent: CDCl3

Temp. 26.0 C / 299.1 K

File: RM1.24\_column2\_f20-22\_1H

Mercury-400BB "merc400"

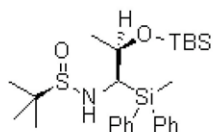

17

Relax. delay 1.000 sec  
Pulse 45.0 degrees  
Acq. time 1.994 sec  
Width 6410.3 Hz  
8 repetitions  
OBSERVE H1, 400.4698269 MHz  
DATA PROCESSING  
FT size 32768  
Total time 0 min, 25 sec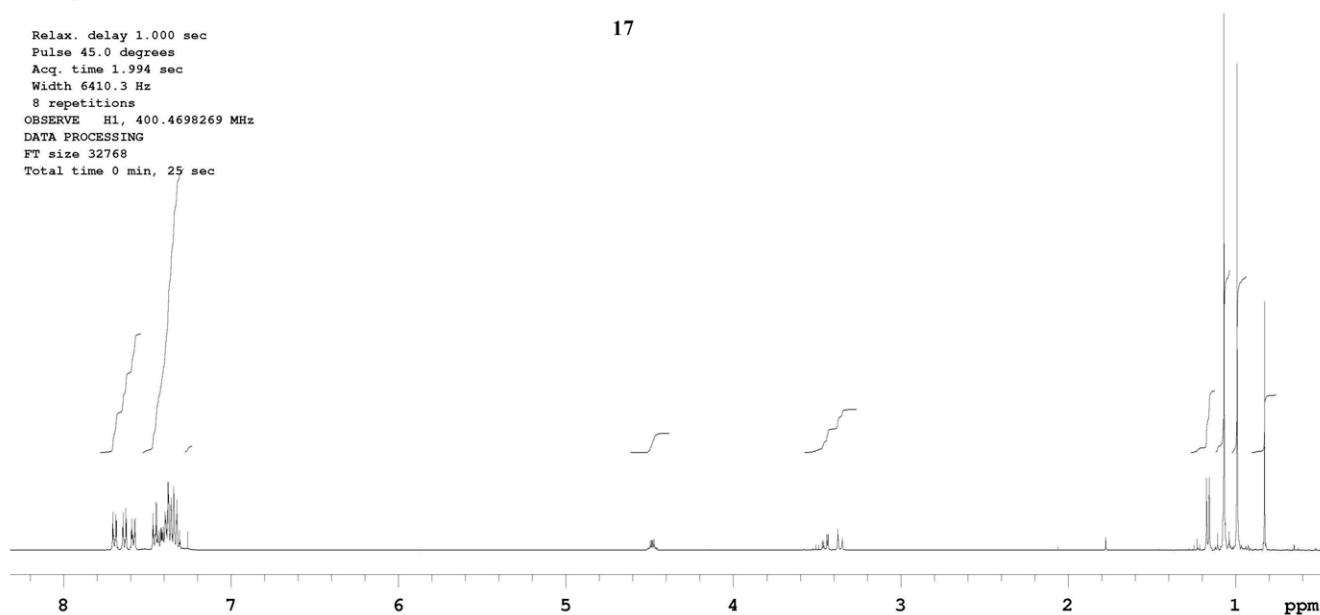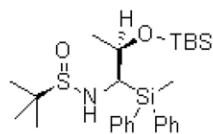

17

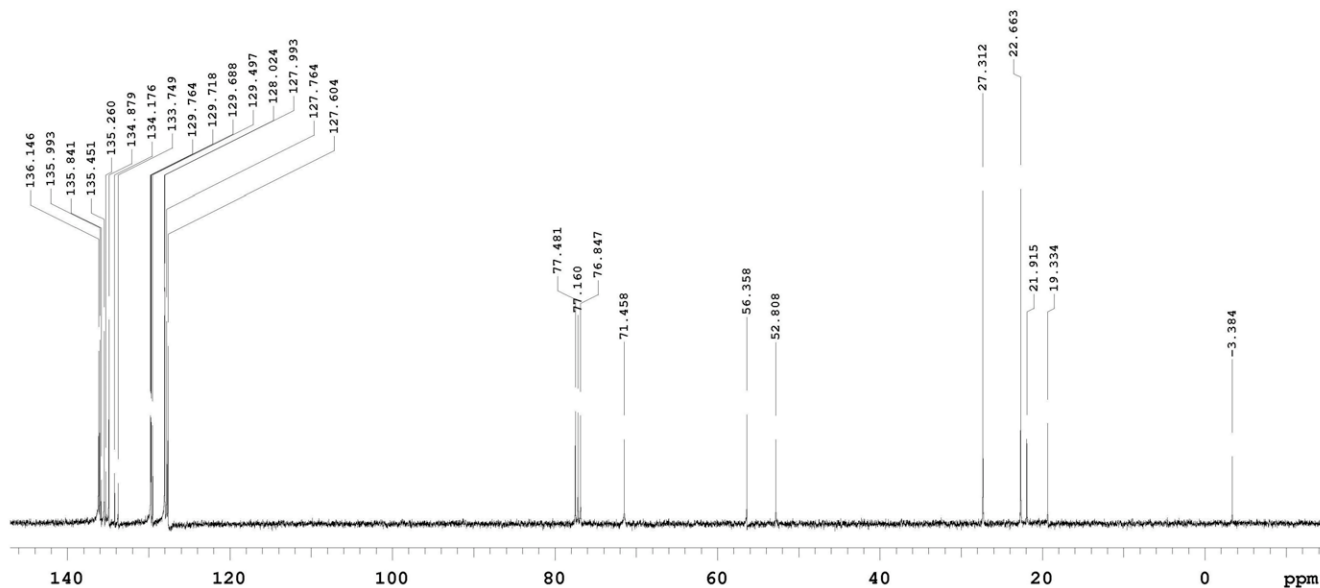

S28

kb1572a6\_9

Archive directory: /export/home/auto/vnmrsys/data  
Sample directory:

Pulse Sequence: s2pul

Solvent: CDCl3

Temp: 26.0 C / 299.1 K

File: kb1572a6\_9

Mercury-400BB "merc400"

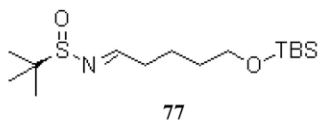

Relax. delay 1.000 sec  
Pulse 45.0 degrees  
Acq. time 1.994 sec  
Width 6410.3 Hz  
8 repetitions  
OBSERVE H1, 400.4698269 MHz  
DATA PROCESSING  
FT size 32768  
Total time 0 min, 25 sec

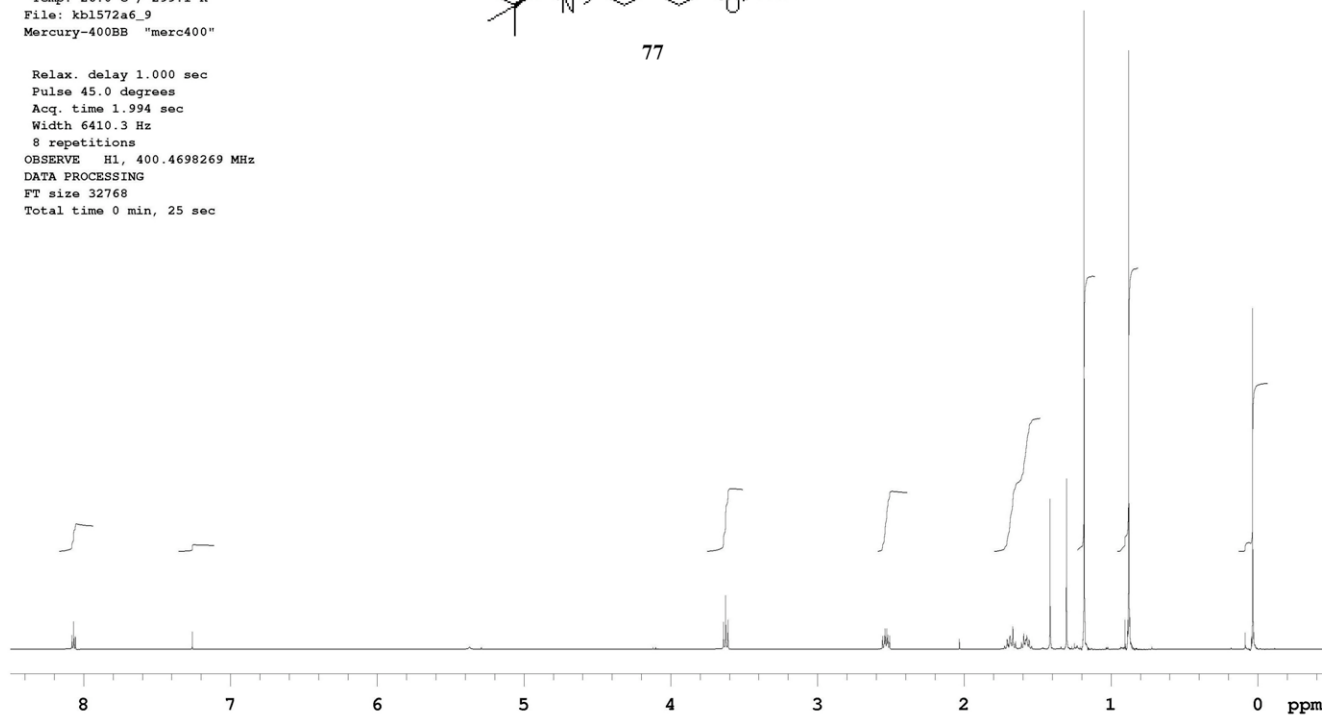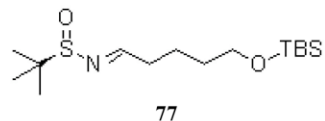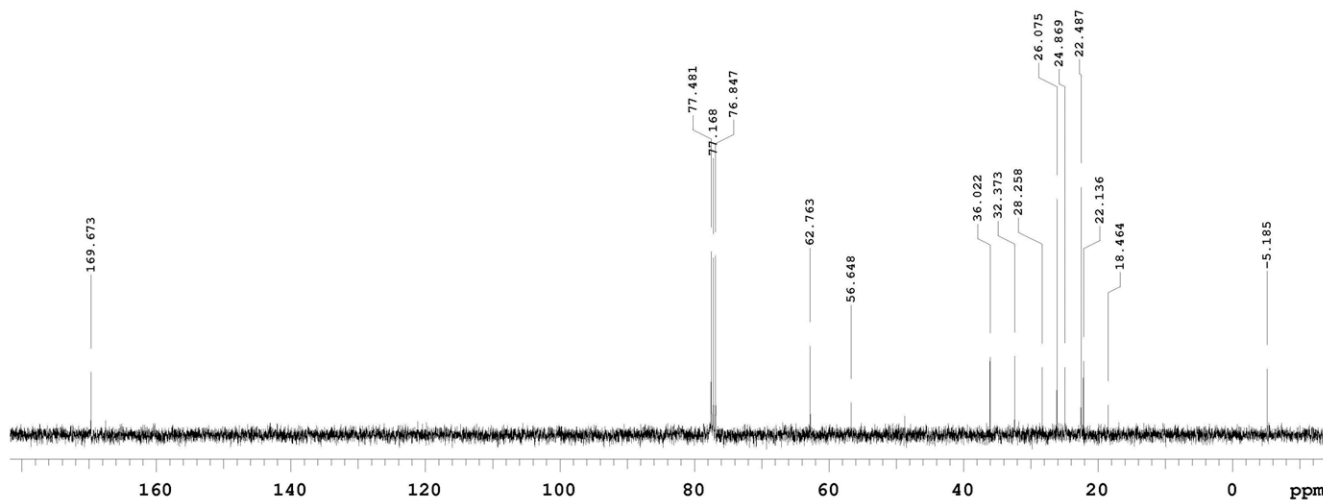



## S29

kbl573a13\_22

Archive directory: /export/home/auto/vnmrsys/data  
Sample directory:

Pulse Sequence: s2pul

Solvent: CDCl3

Temp. 26.0 C / 299.1 K

File: kbl573a13\_22

Mercury-400BB "merc400"

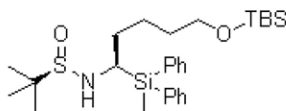

18

Relax. delay 1.000 sec  
Pulse 45.0 degrees  
Acq. time 1.994 sec  
Width 6410.3 Hz  
8 repetitions  
OBSERVE H1, 400.4698269 MHz  
DATA PROCESSING  
FT size 32768  
Total time 0 min, 25 sec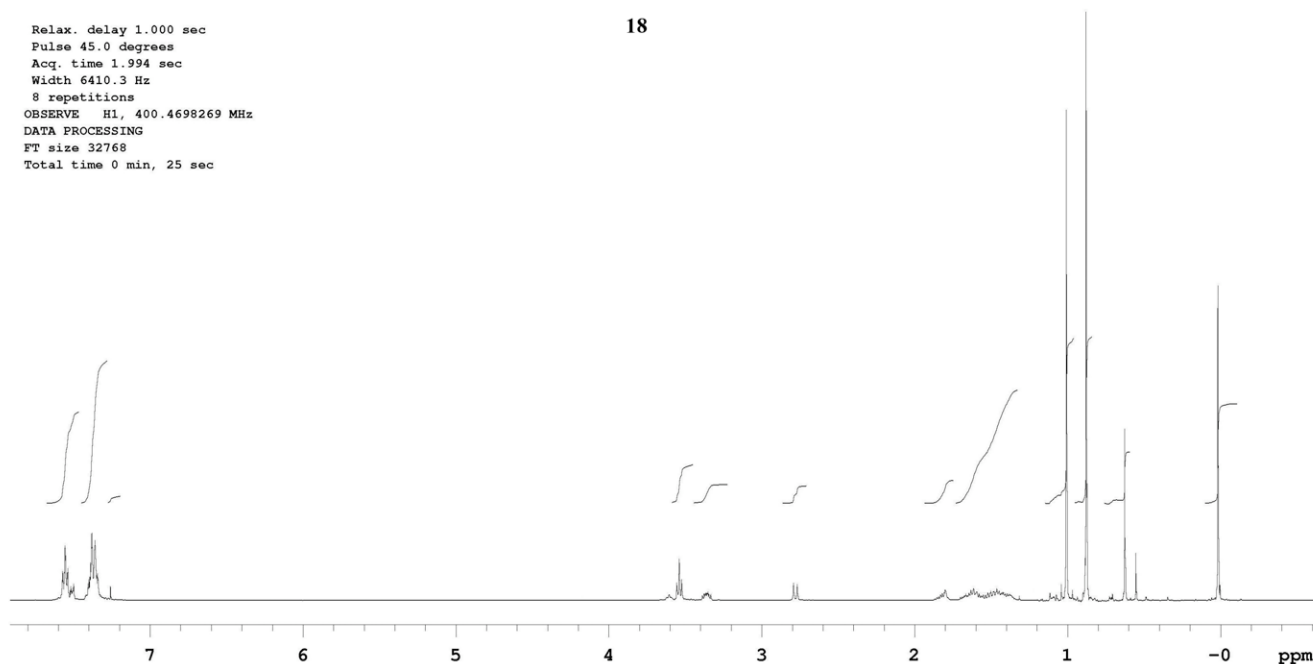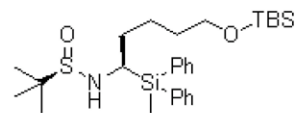

18

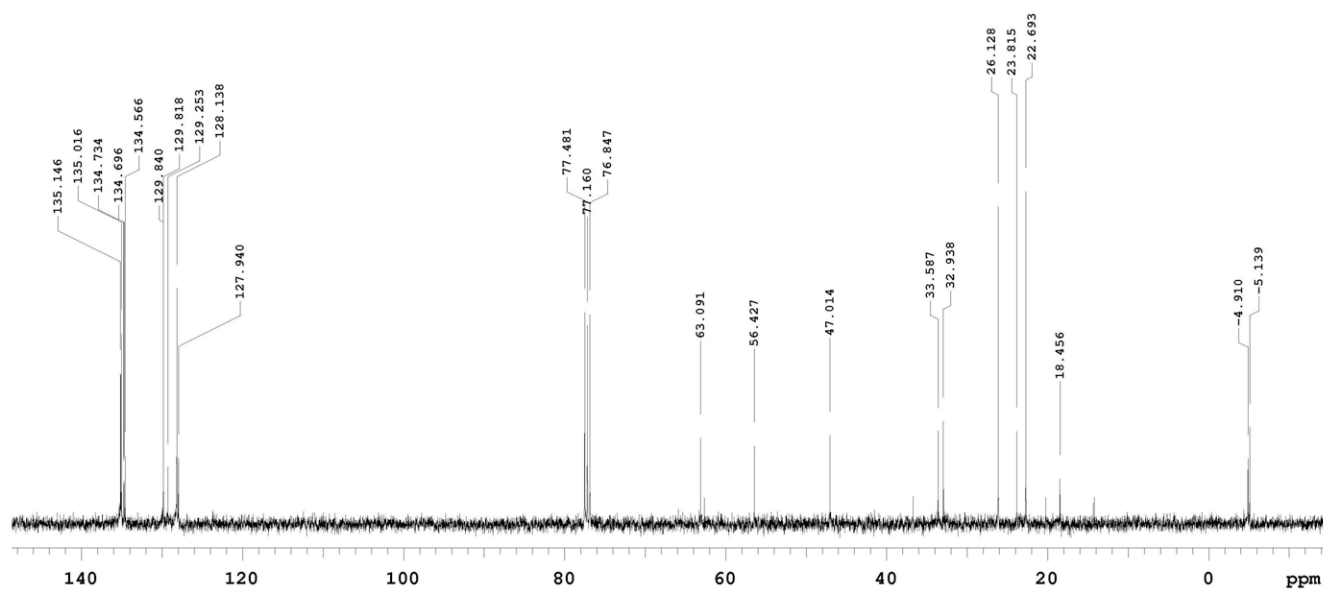

kbl574a12\_17

Archive directory: /export/home/auto/vnmrsys/data  
Sample directory:

Pulse Sequence: s2pul

Solvent: CDCl<sub>3</sub>

Temp. 26.0 C / 299.1 K

File: kbl574a12\_17

Mercury-400BB "merc400"

Relax. delay 1.000 sec

Pulse 45.0 degrees

Acq. time 1.994 sec

Width 6410.3 Hz

8 repetitions

OBSERVE H1, 400.4698269 MHz

DATA PROCESSING

FT size 32768

Total time 0 min, 25 sec

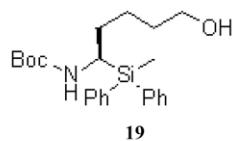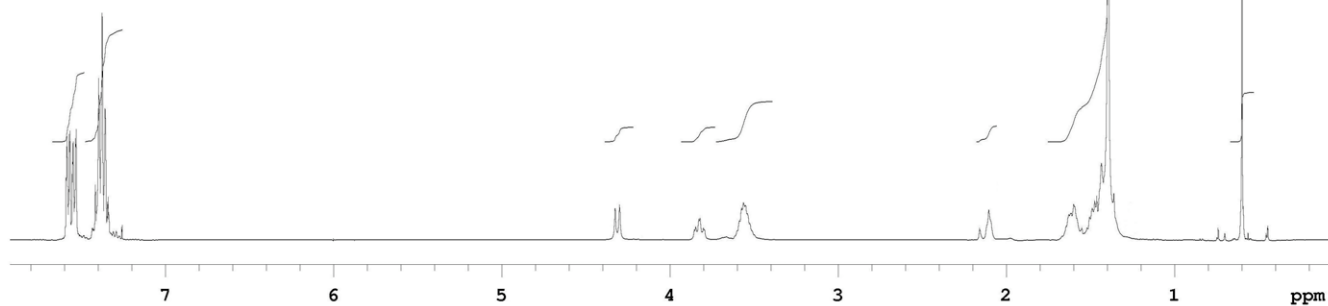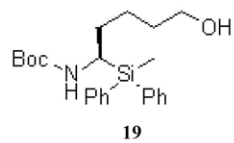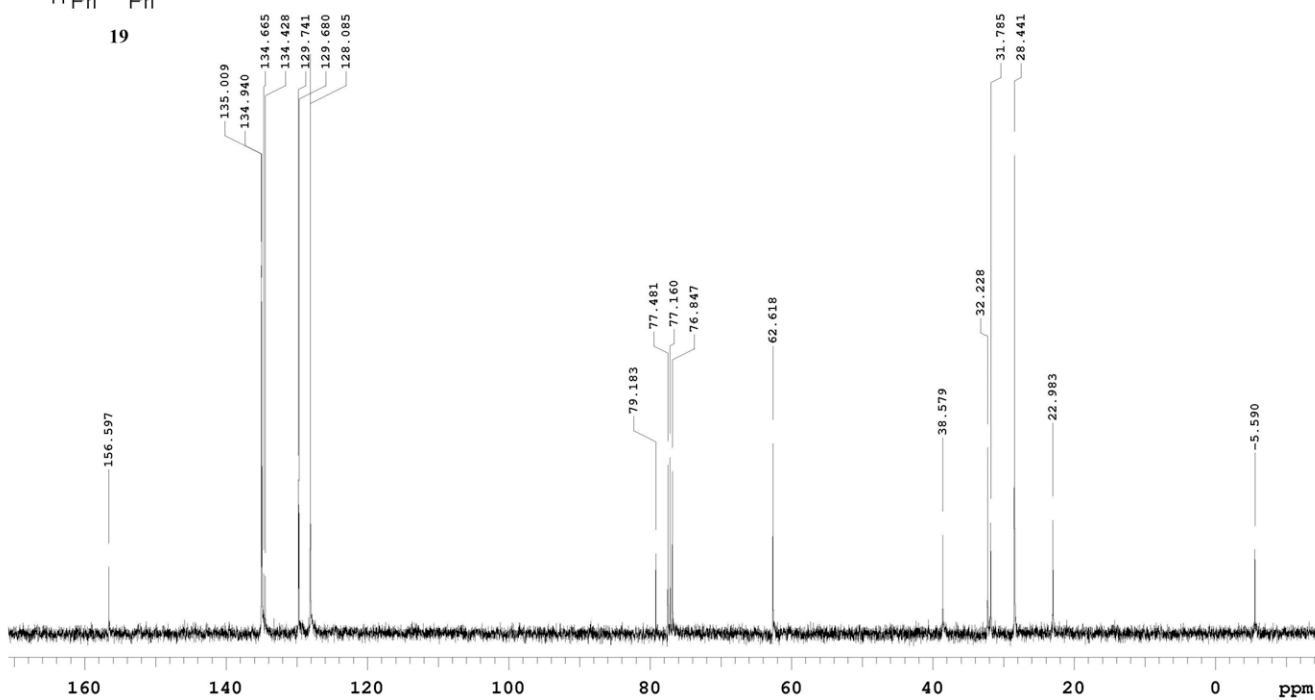

## S31

kb1575a8\_15

Archive directory: /export/home/aut/vnmrsws/data  
Sample directory:

Pulse Sequence: s2pul

Solvent: CDCl<sub>3</sub>

Temp. 26.0 C / 299.1 K

File: kb1575a8\_15

Mercury-400BB "merc400"

Relax. delay 1.000 sec

Pulse 45.0 degrees

Acq. time 1.994 sec

Width 6410.3 Hz

8 repetitions

OBSERVE H1, 400.4698269 MHz

DATA PROCESSING

FT size 32768

Total time 0 min, 25 sec

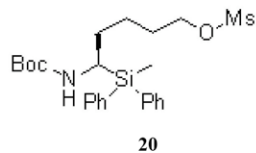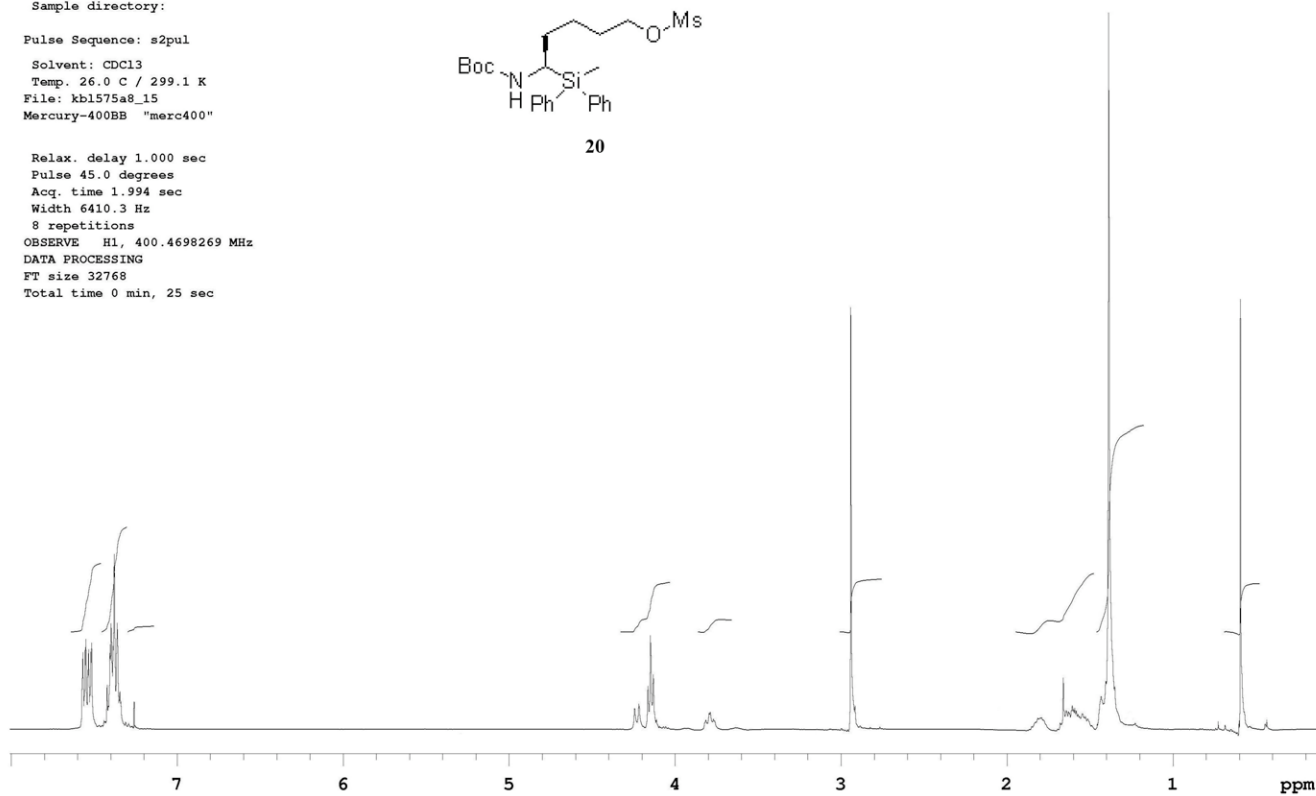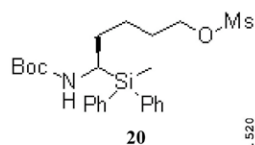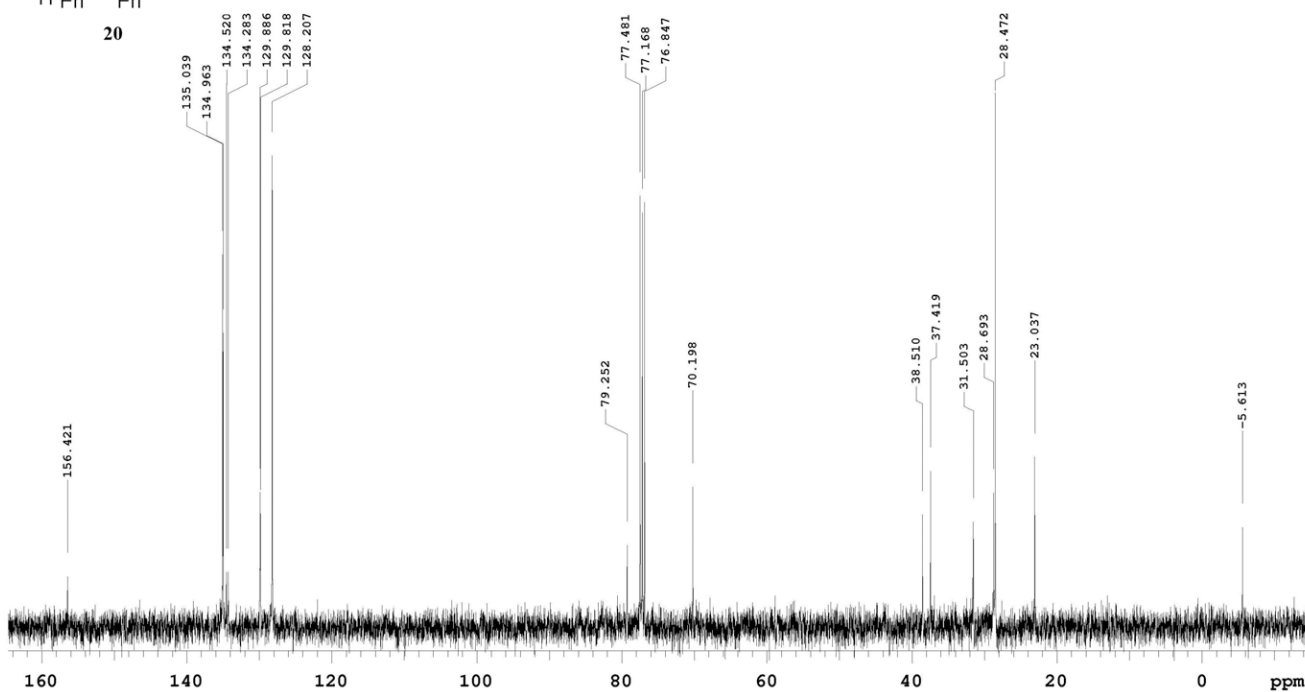

kbl576a4\_9

Archive directory: /export/home/auto/vnmrsys/data  
 Sample directory:

Pulse Sequence: s2pul

Solvent: CDCl<sub>3</sub>  
 Temp. 26.0 C / 299.1 K  
 File: kbl576a4\_9  
 Mercury-400BB "merc400"

Relax. delay 1.000 sec  
 Pulse 45.0 degrees  
 Acq. time 1.994 sec  
 Width 6410.3 Hz  
 8 repetitions  
 OBSERVE H1, 400.4698269 MHz  
 DATA PROCESSING  
 FT size 32768  
 Total time 0 min, 25 sec

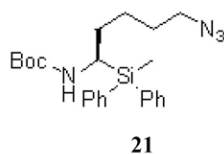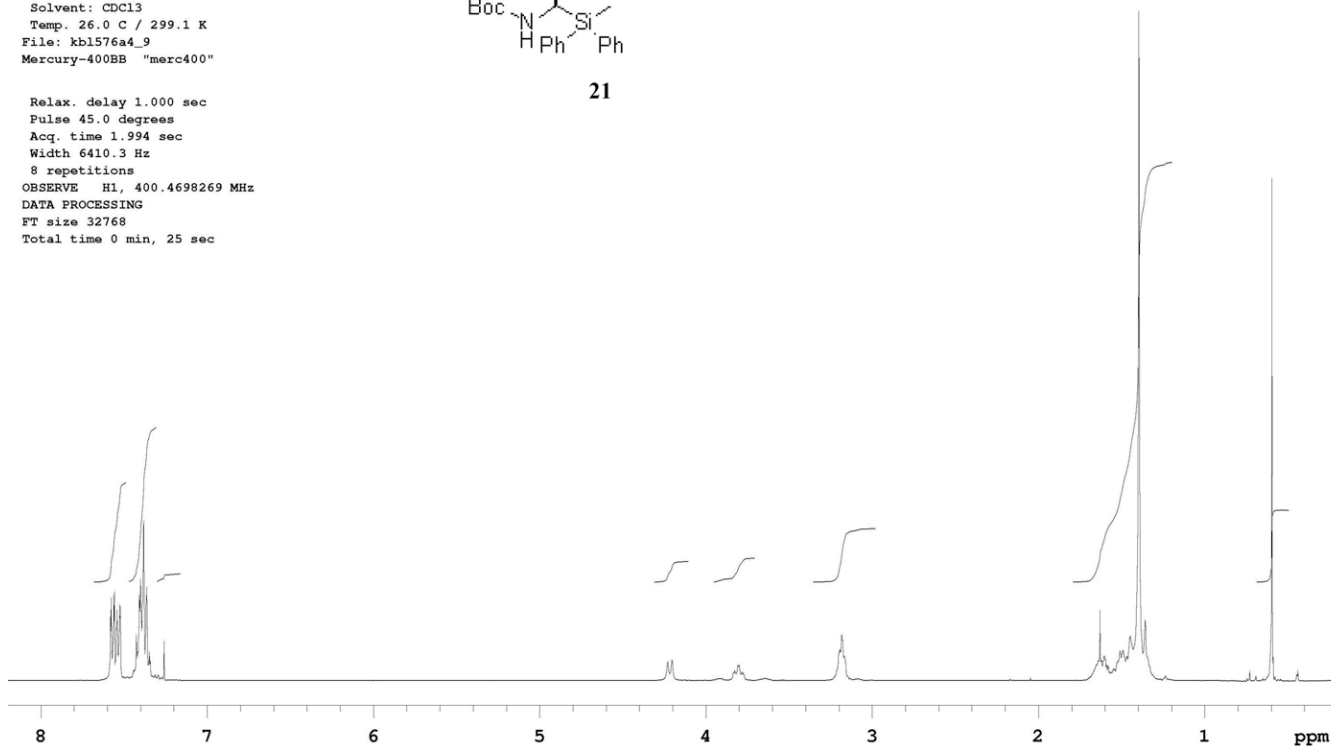

ref  
 exp3 s2pul  
 SAMPLE SPECIAL 26.0  
 date Aug 24 2009 temp  
 solvent CDCl<sub>3</sub> gain not used  
 file exp spin 20  
 ACQUISITION hst 0.008  
 sw 25188.3 pw90 10.500  
 at 1.199 alfa 9.550  
 np 60422  
 fb 13800 il  
 bt 16 in n  
 d1 1.000 dp y  
 nt 256 hs nn  
 ct 96  
 TRANSMITTER lb 24.00  
 tn C13 fn not used  
 sfrq 100.709 DISPLAY 327.6  
 tof 1581.5 sp 13272.1  
 tpwr 62 wp 3298.3  
 pw 5.250 rfp 7768.9  
 DECOUPLER H1 rp 19.9  
 dn 0 lp 252.5  
 dof 0  
 dm yvy  
 dma w wc 270  
 dpwr 38 sc 0  
 dmf 11800 vs 92  
 th 6  
 nm

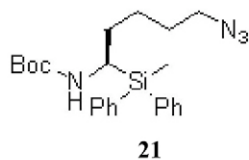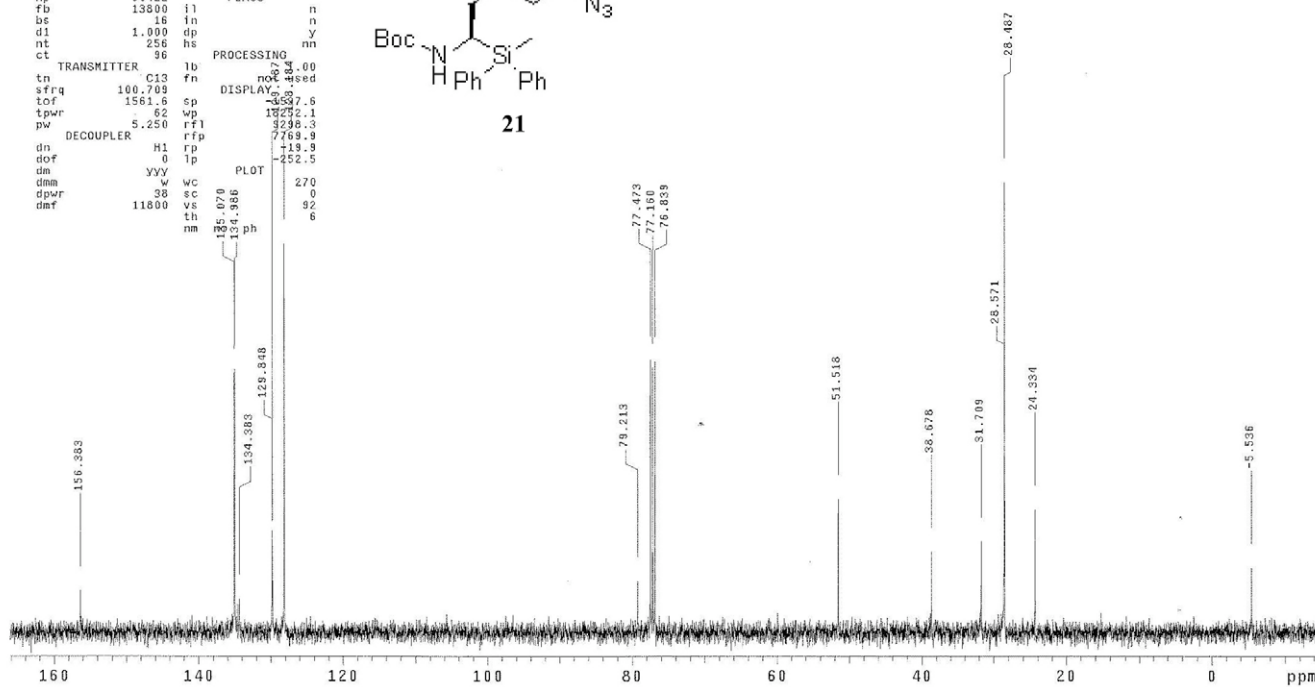

kb1577a\_3\_4

Archive directory: /export/home/auto/vnmrsys/data  
Sample directory:

Pulse Sequence: s2pul

Solvent: CDCl<sub>3</sub>

Temp. 26.0 C / 299.1 K

File: kb1577a\_3\_4

Mercury-400BB "merc400"

Relax. delay 1.000 sec

Pulse 45.0 degrees

Acq. time 1.994 sec

Width 6410.3 Hz

8 repetitions

OBSERVE H1, 400.4698269 MHz

DATA PROCESSING

FT size 32768

Total time 0 min, 25 sec

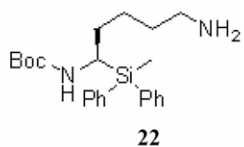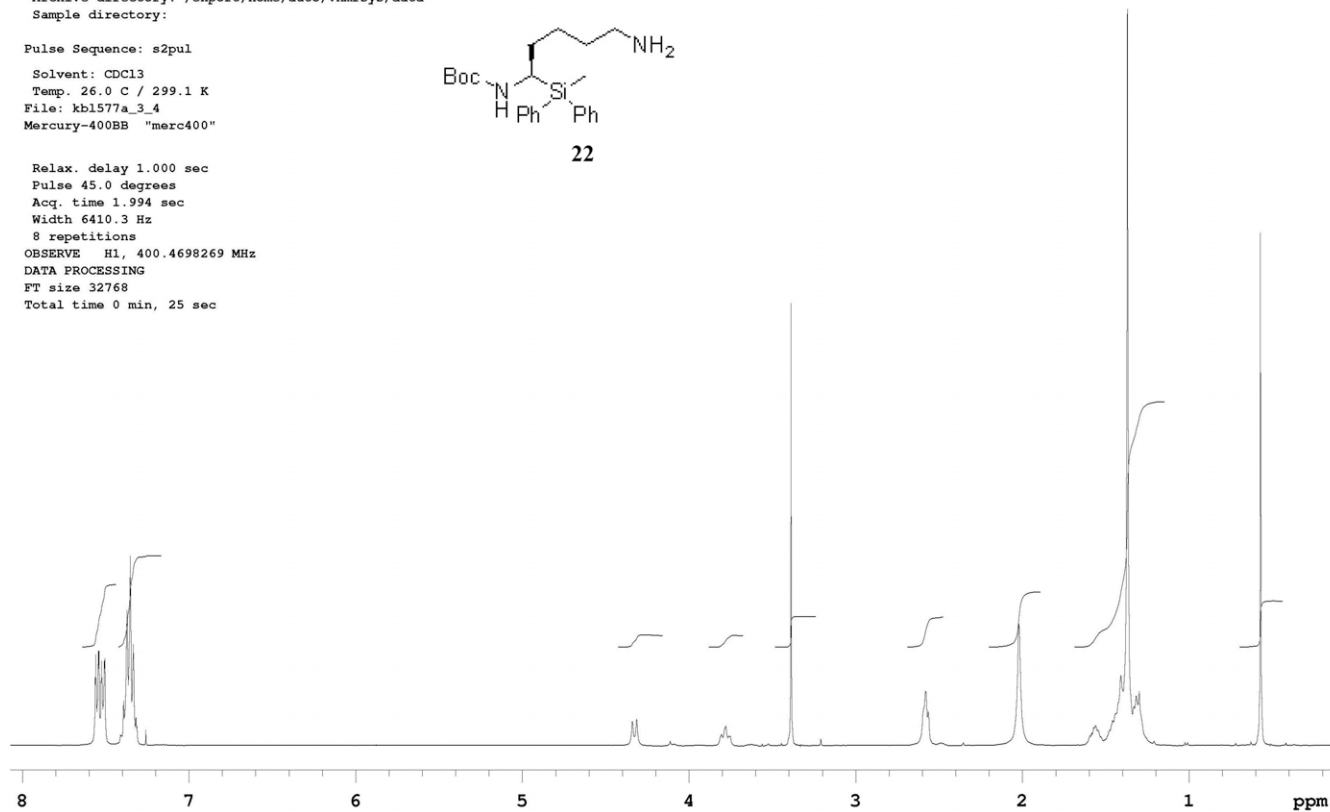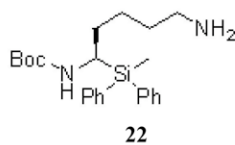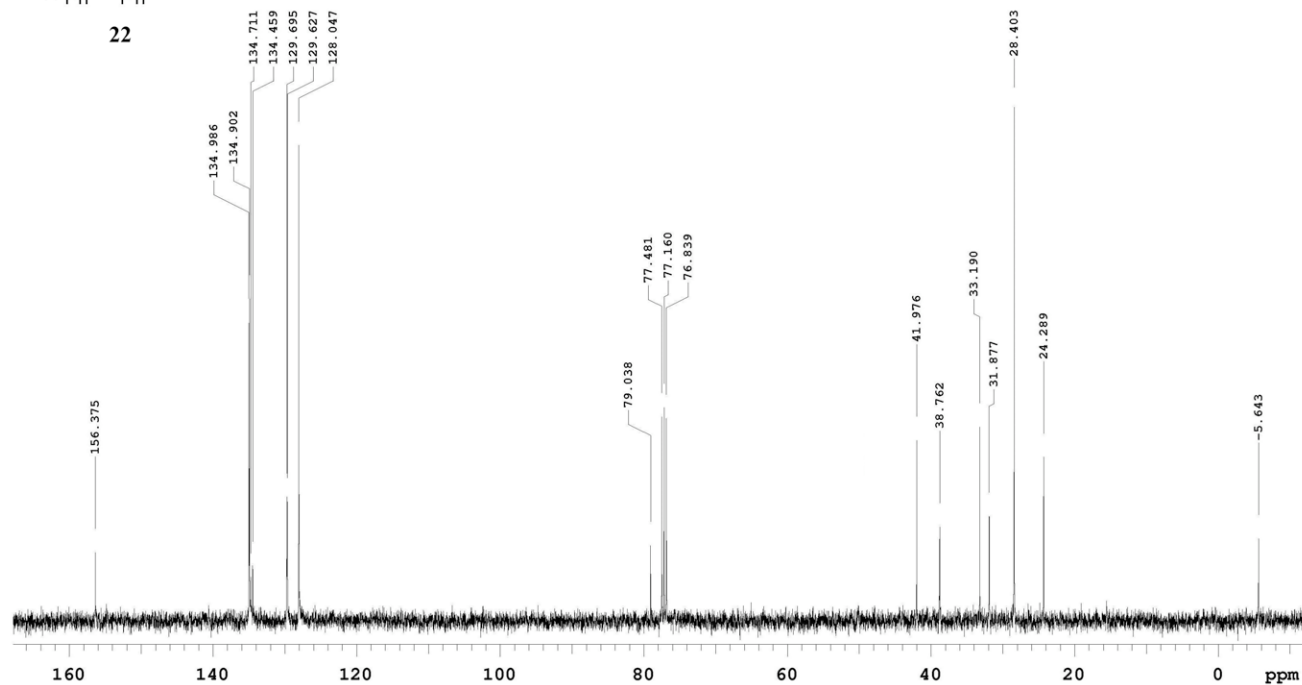

kbl361b11\_16

Archive directory: /export/home/auto/vnmrsys/data  
Sample directory:

Pulse Sequence: s2pul

Solvent: CDCl<sub>3</sub>

Temp. 26.0 C / 299.1 K

File: kbl361b11\_16

Mercury-400BB "merc400"

Relax. delay 1.000 sec

Pulse 45.0 degrees

Acq. time 1.994 sec

Width 6410.3 Hz

8 repetitions

OBSERVE H1, 400.4698269 MHz

DATA PROCESSING

FT size 32768

Total time 0 min, 25 sec

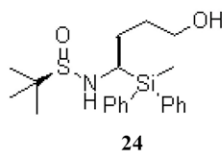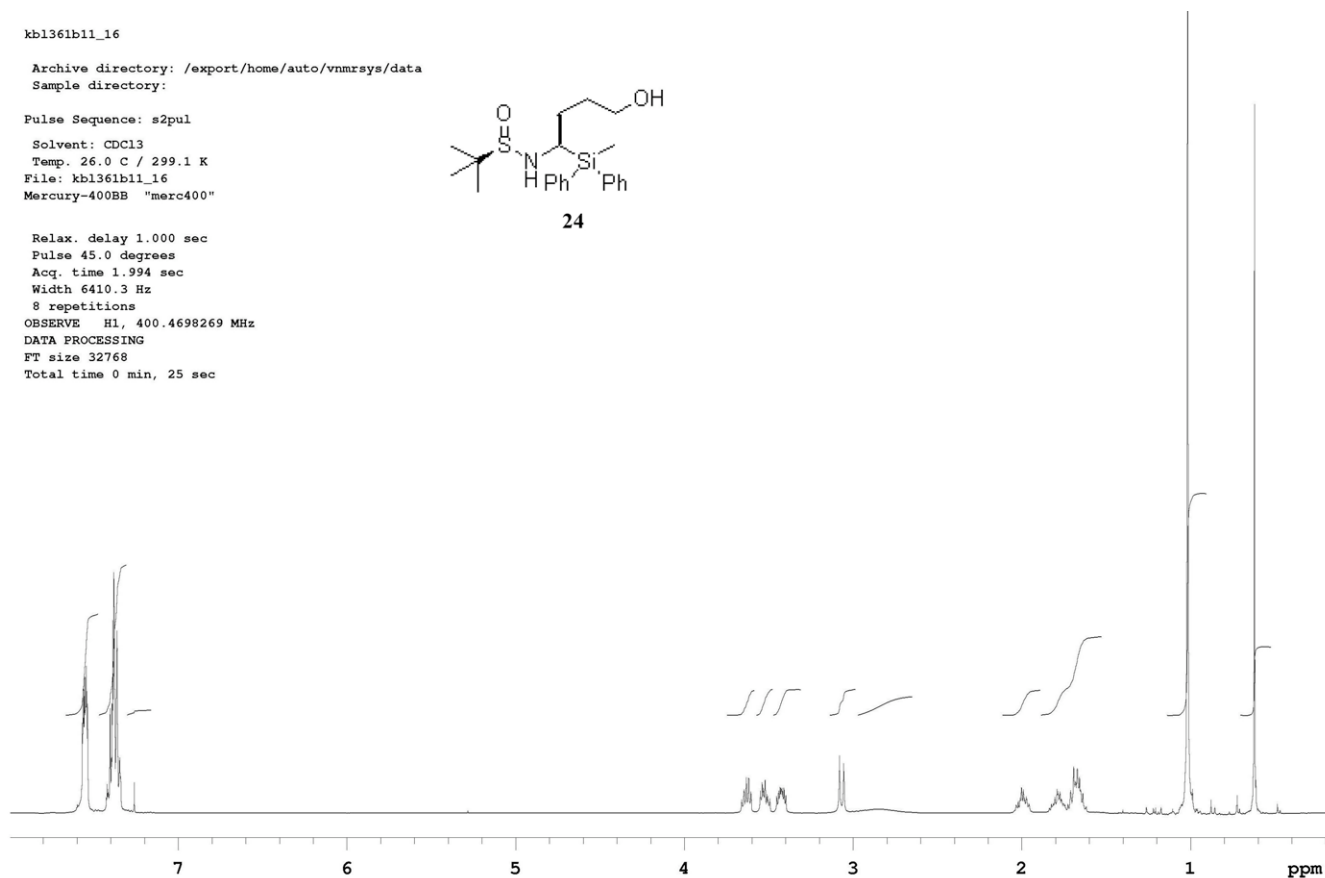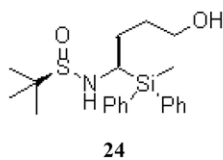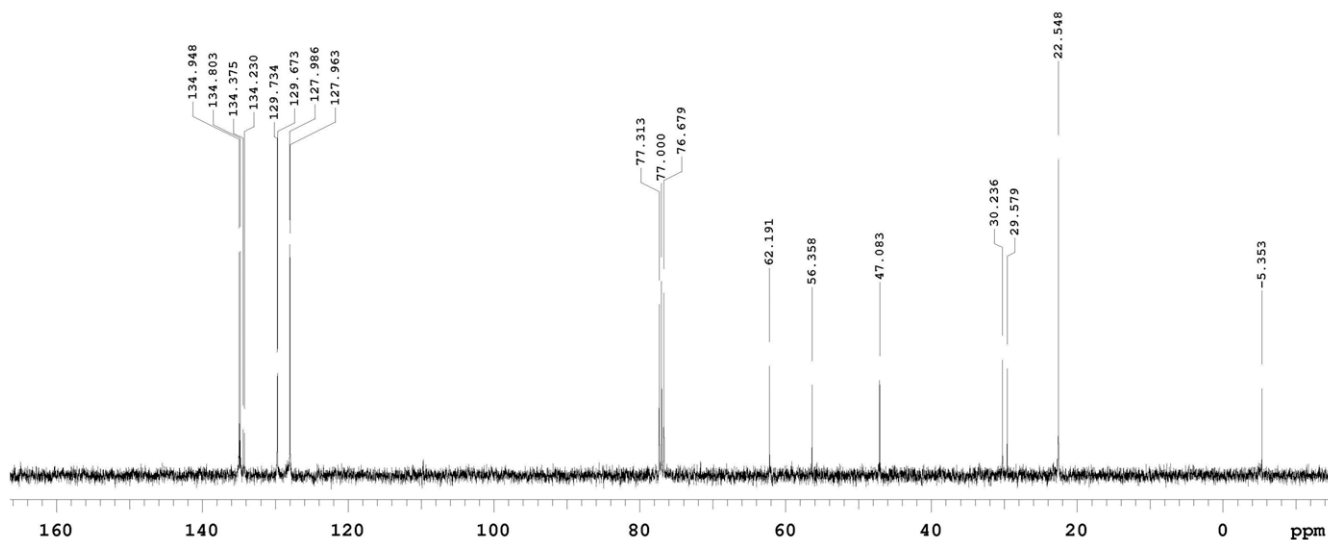

kb1502b13\_15

Archive directory: /export/home/auto/vnmrsvs/data  
Sample directory:

Pulse Sequence: s2pul

Solvent: CDCl<sub>3</sub>

Temp. 26.0 C / 299.1 K

File: kb1502b13\_15

Mercury-400BB "merc400"

Relax. delay 1.000 sec  
Pulse 45.0 degrees  
Acq. time 1.994 sec  
Width 6410.3 Hz  
8 repetitions  
OBSERVE H1, 400.4698269 MHz  
DATA PROCESSING  
FT size 32768  
Total time 0 min, 25 sec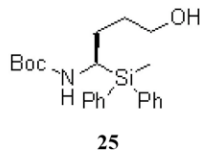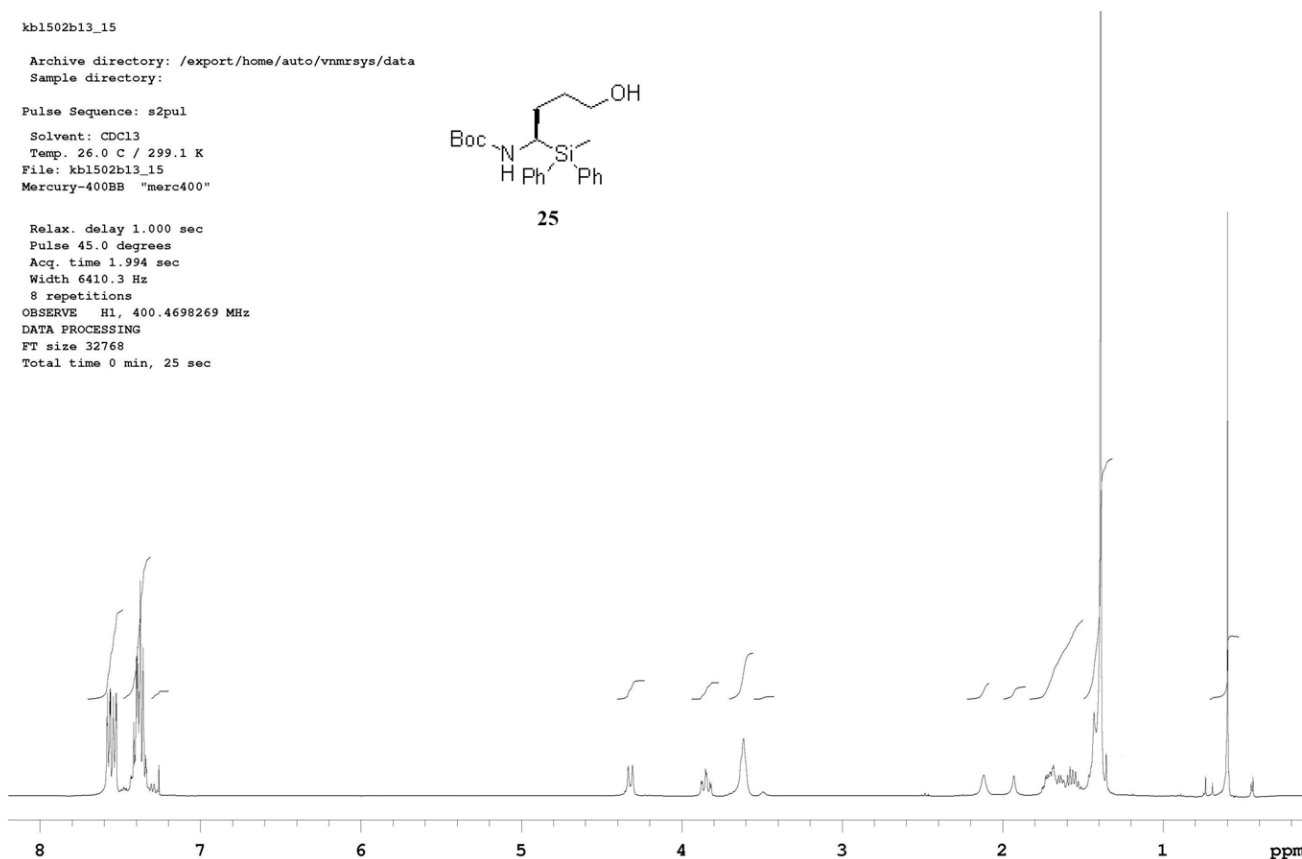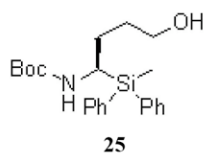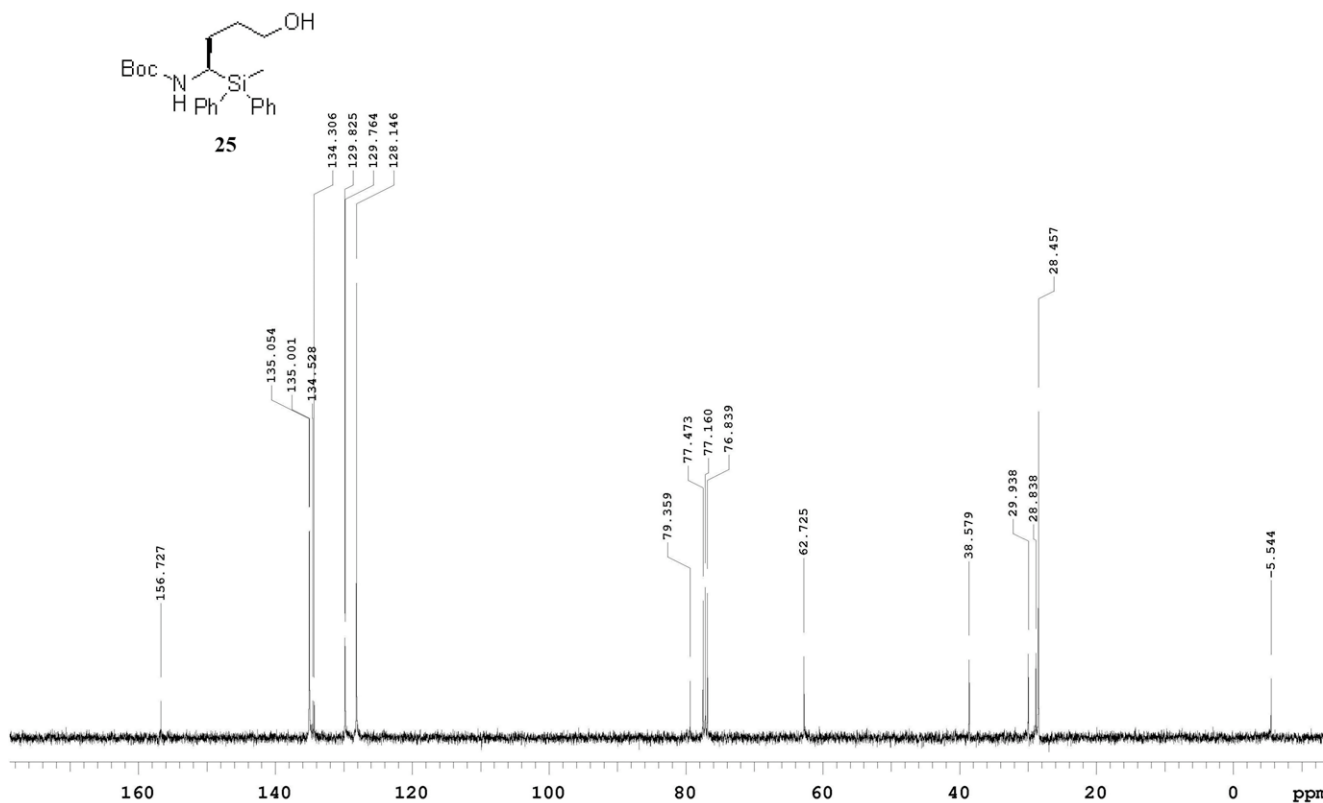

kb1513a\_crude

Archive directory: /export/home/auto/vnmrsys/data  
Sample directory:

Pulse Sequence: s2pul

Solvent: CDCl3

Temp. 26.0 C / 299.1 K

File: kb1513a\_crude

Mercury-400BB "merc400"

Relax. delay 1.000 sec

Pulse 45.0 degrees

Acq. time 1.994 sec

Width 6410.3 Hz

8 repetitions

OBSERVE H1, 400.4698269 MHz

DATA PROCESSING

FT size 32768

Total time 0 min, 25 sec

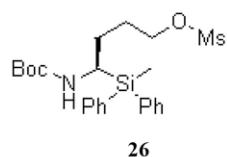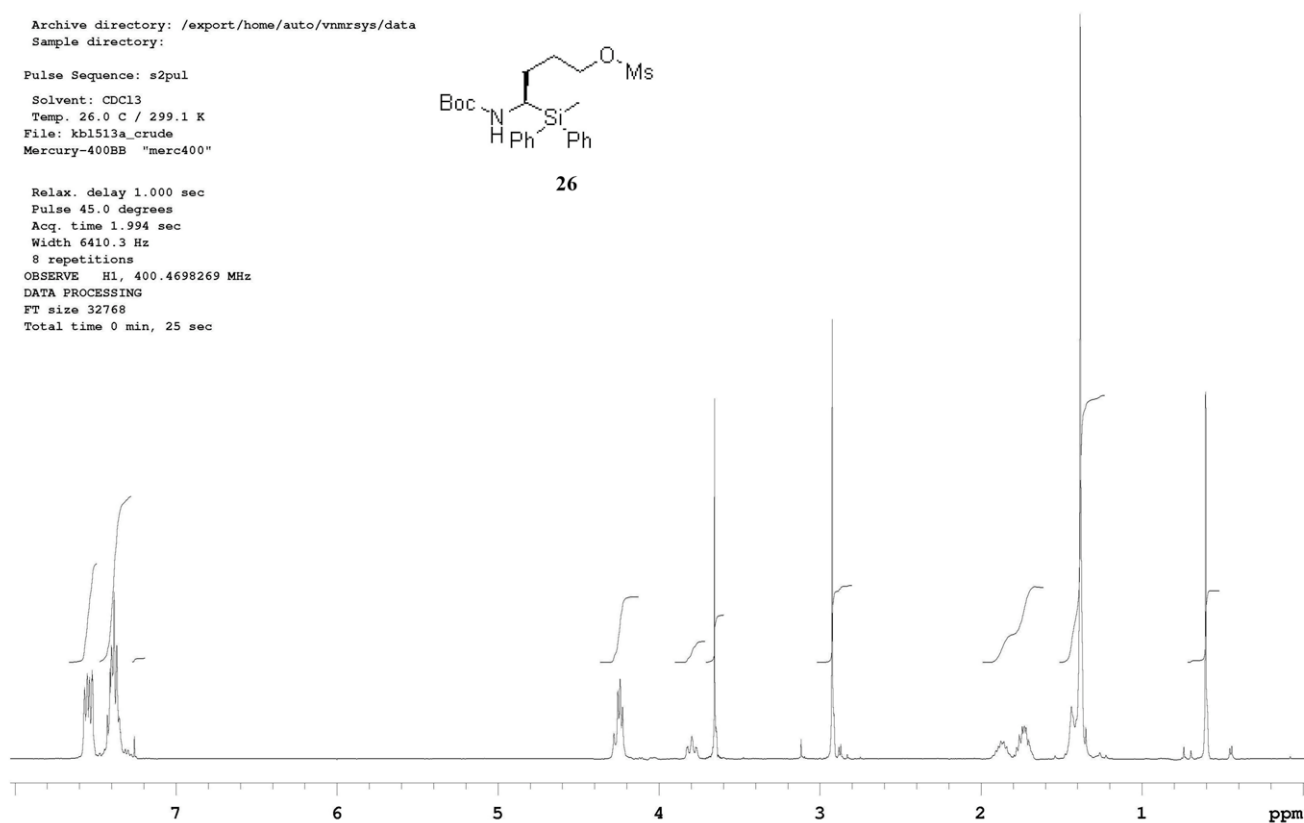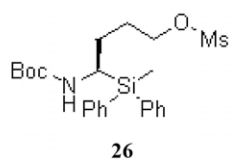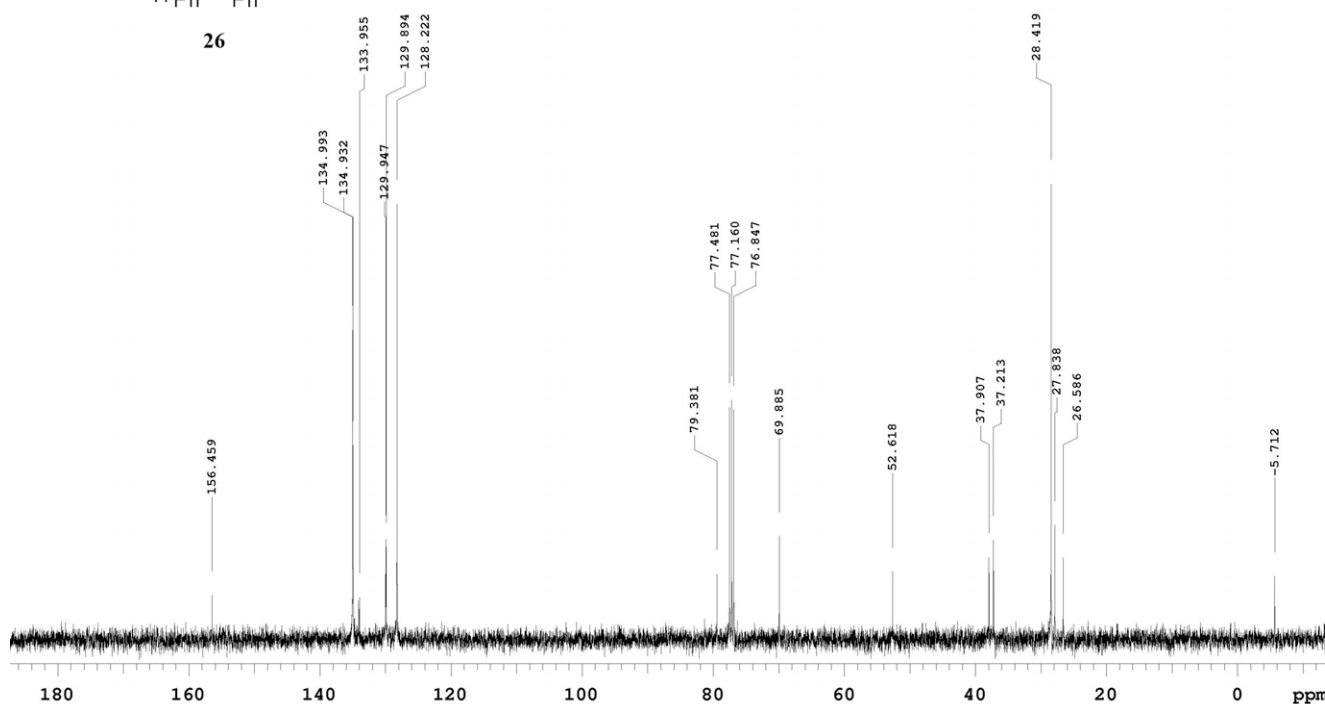



kbl513a3\_5

Archive directory: /export/home/auto/vnmrsys/data  
Sample directory:

Pulse Sequence: s2pul

Solvent: CDCl<sub>3</sub>

Temp. 26.0 C / 299.1 K

File: kbl513a3\_5

Mercury-400BB "merc400"

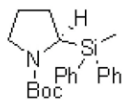

27

Relax. delay 1.000 sec  
Pulse 45.0 degrees  
Acq. time 1.994 sec  
Width 6410.3 Hz  
8 repetitions  
OBSERVE H1, 400.4698269 MHz  
DATA PROCESSING  
FT size 32768  
Total time 0 min, 25 sec

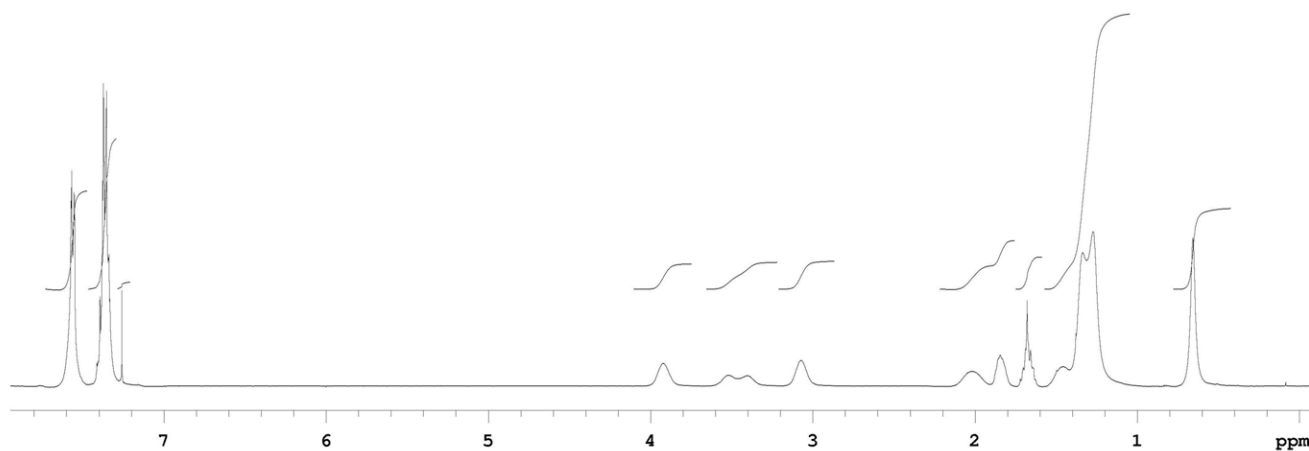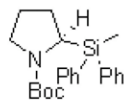

27

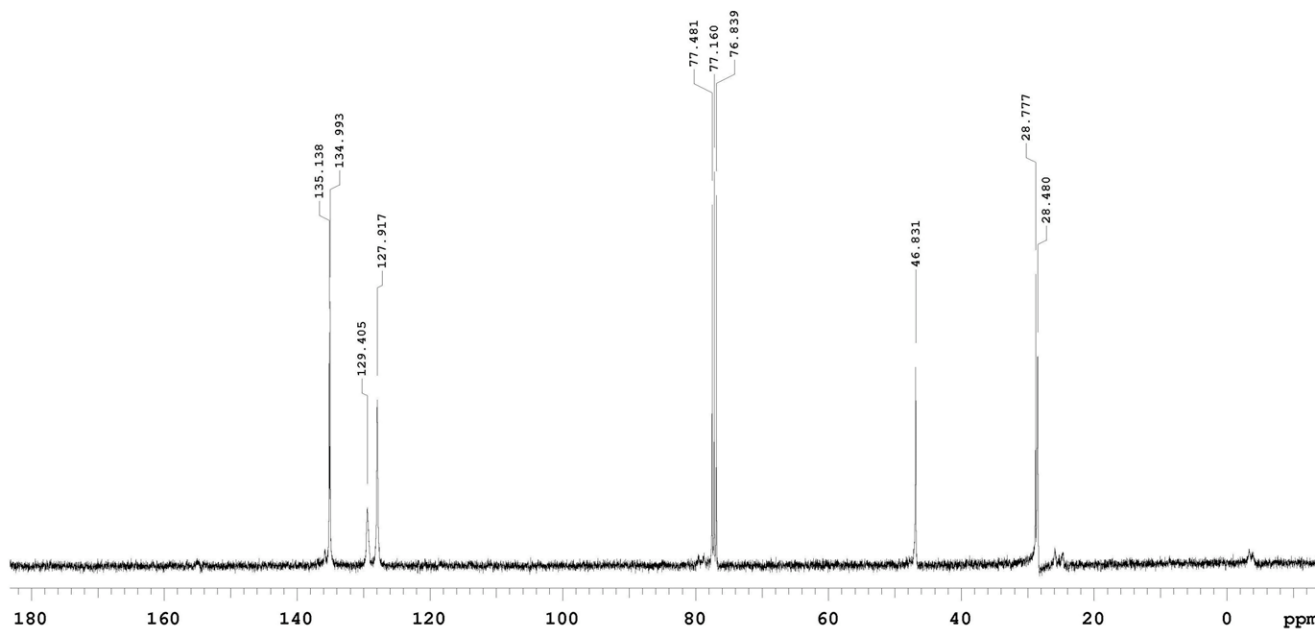

kb1516a5\_9

Archive directory: /export/home/auto/vnmrsys/data  
Sample directory:

Pulse Sequence: s2pul

Solvent: CDCl<sub>3</sub>

Temp. 26.0 C / 299.1 K

File: kb1516a5\_9

Mercury-400BB "merc400"

Relax. delay 1.000 sec  
Pulse 45.0 degrees  
Acq. time 1.994 sec  
Width 6410.3 Hz  
8 repetitions  
OBSERVE H1, 400.4698269 MHz  
DATA PROCESSING  
FT size 32768  
Total time 0 min, 25 sec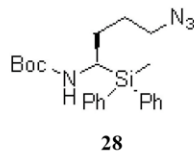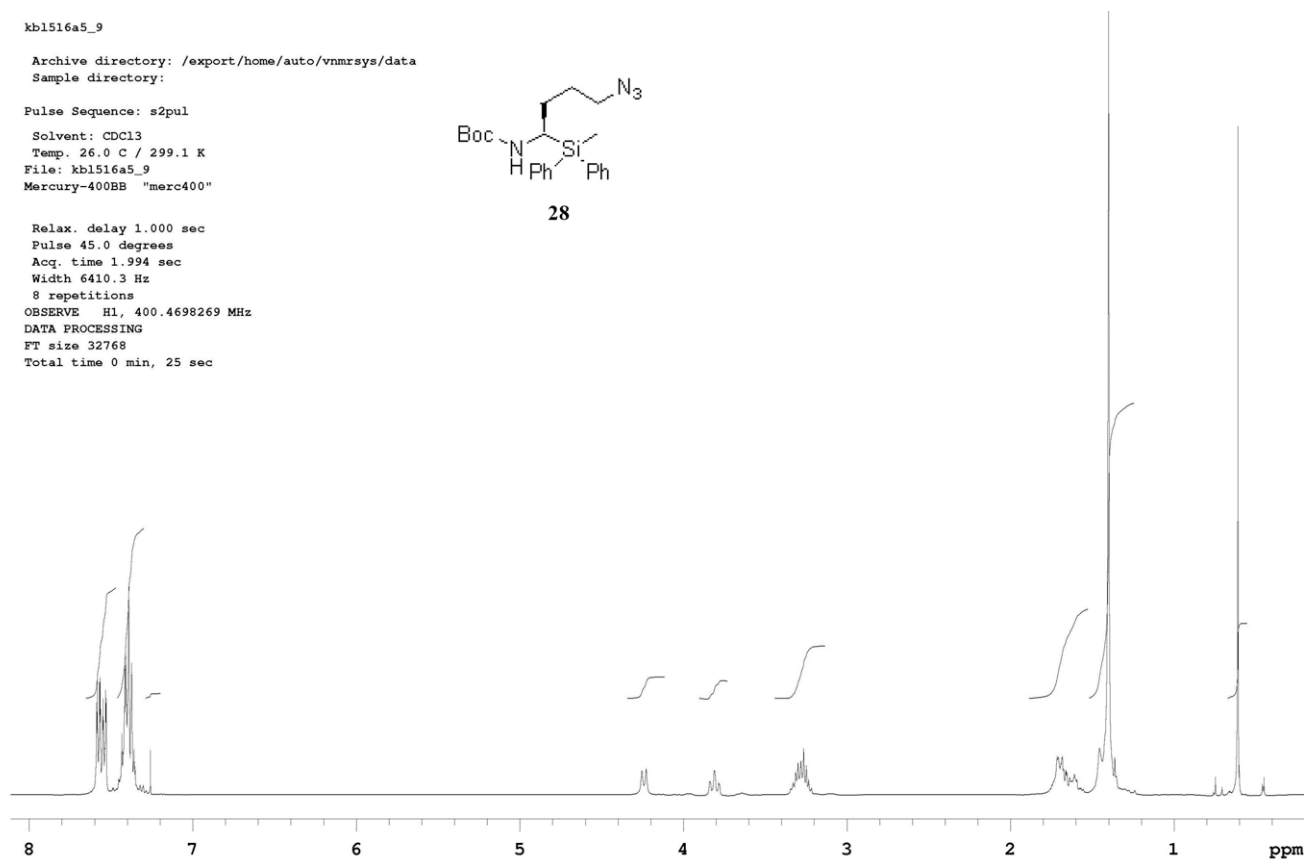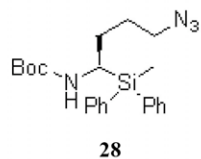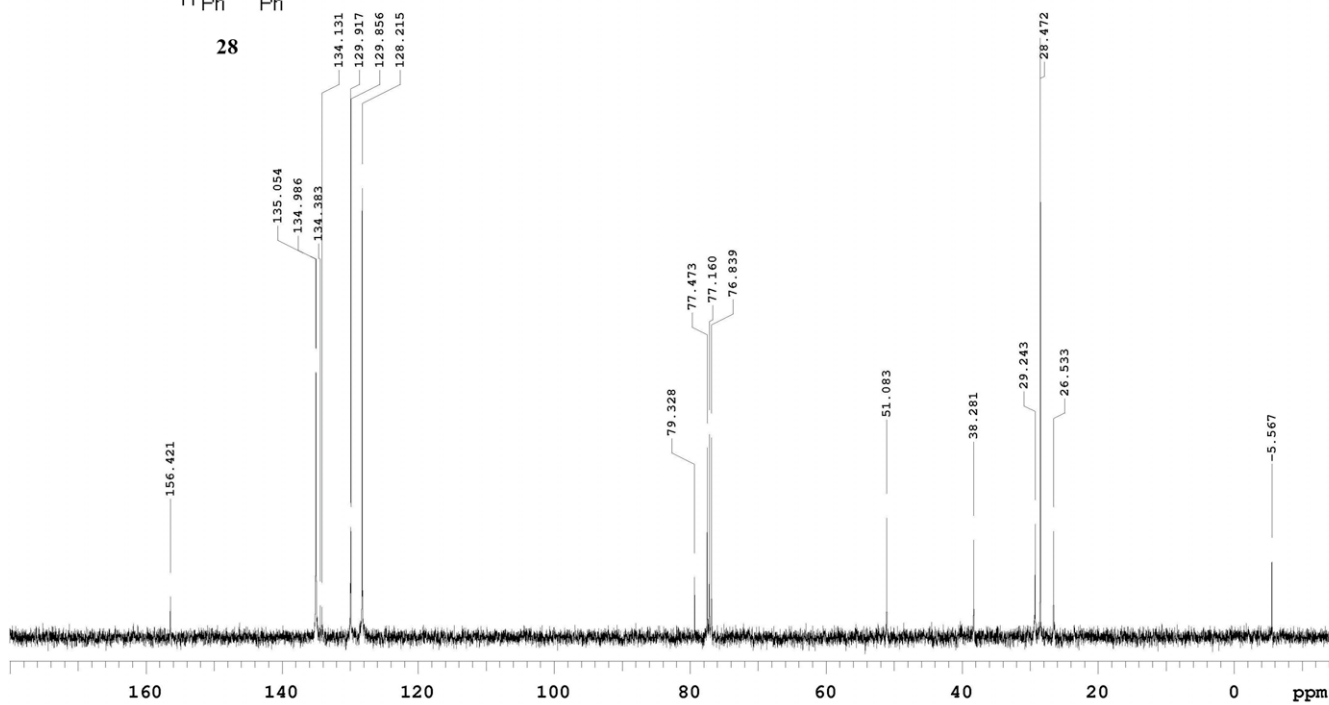

kb1519c12\_15

Archive directory: /export/home/auto/vnmrsys/data  
Sample directory:

Pulse Sequence: s2pul

Solvent: CDCl3

Temp. 26.0 C / 299.1 K

File: kb1519c12\_15

Mercury-400BB "merc400"

Relax. delay 1.000 sec

Pulse 45.0 degrees

Acq. time 1.994 sec

Width 6410.3 Hz

8 repetitions

OBSERVE H1, 400.4698269 MHz

DATA PROCESSING

FT size 32768

Total time 0 min, 25 sec

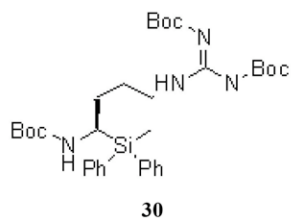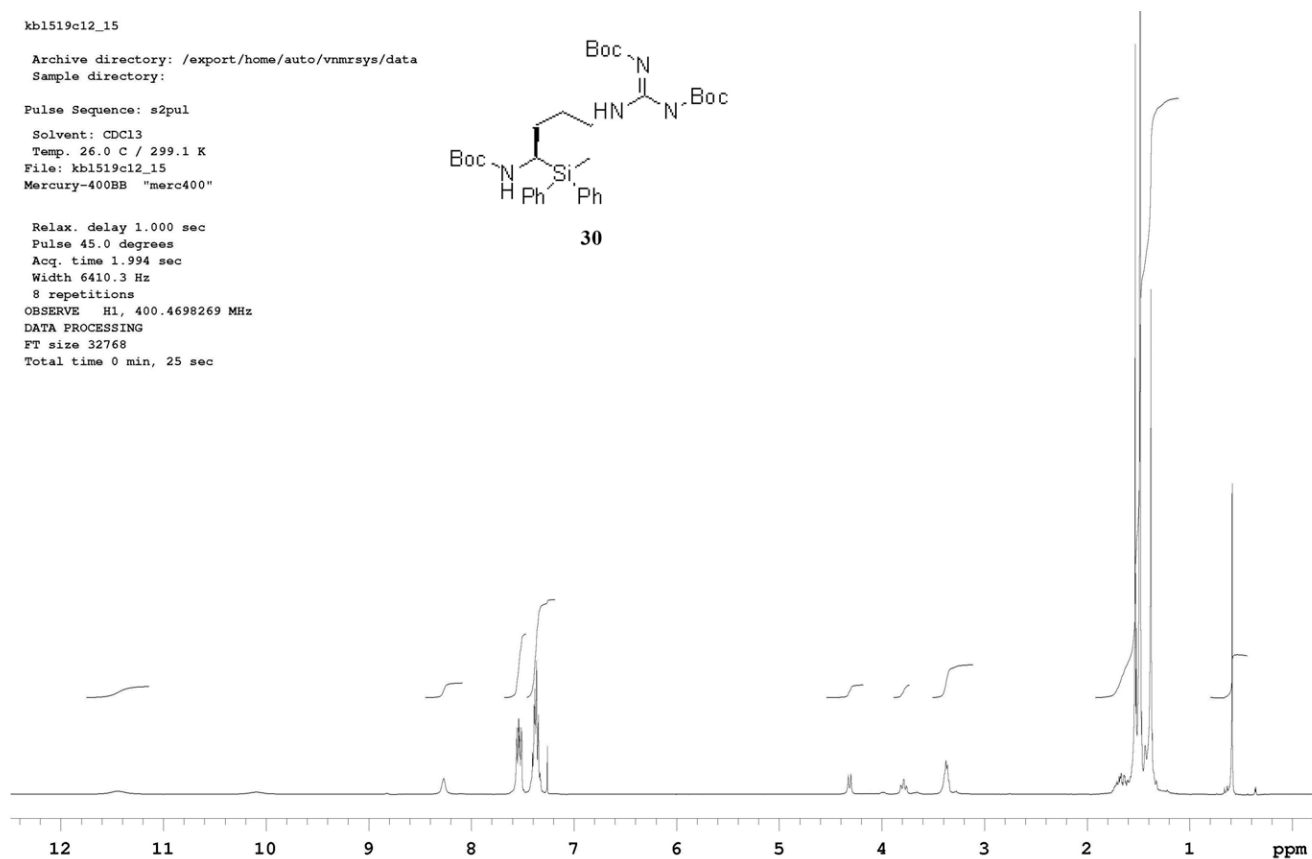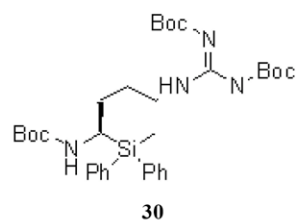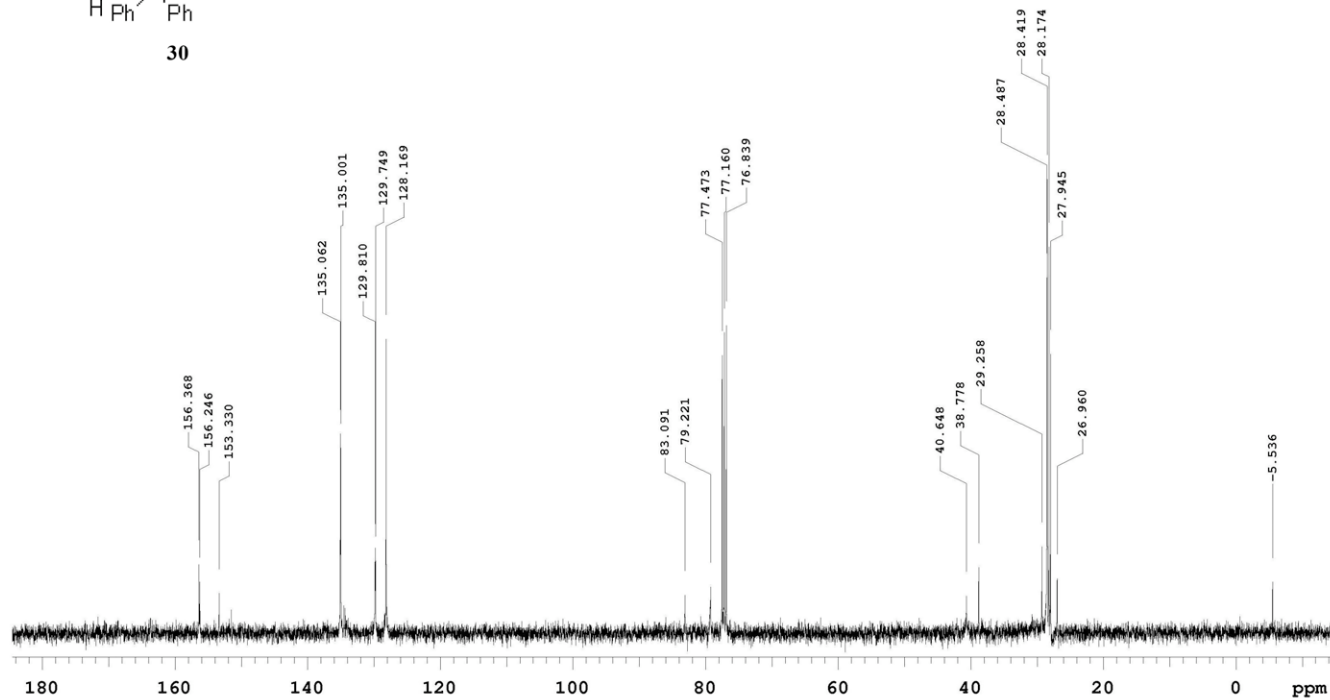

Friis\_1-12\_crude

Archive directory: /export/home/auto/vnmrsys/data  
Sample directory:

Pulse Sequence: s2pul

Solvent: CDCl<sub>3</sub>  
Temp. 26.0 C / 299.1 K  
File: Friis\_1-12\_crude  
Mercury-400BB "merc400"Relax. delay 1.000 sec  
Pulse 45.0 degrees  
Acq. time 1.994 sec  
Width 6410.3 Hz  
8 repetitions  
OBSERVE H1, 400.4698269 MHz  
DATA PROCESSING  
FT size 32768  
Total time 0 min, 25 sec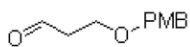

76

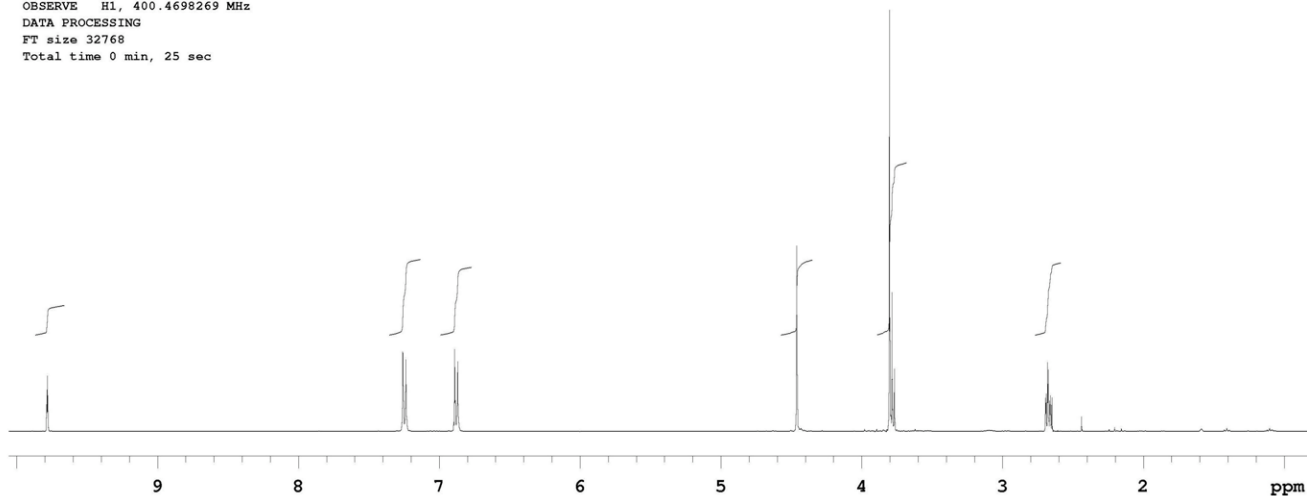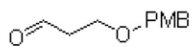

76

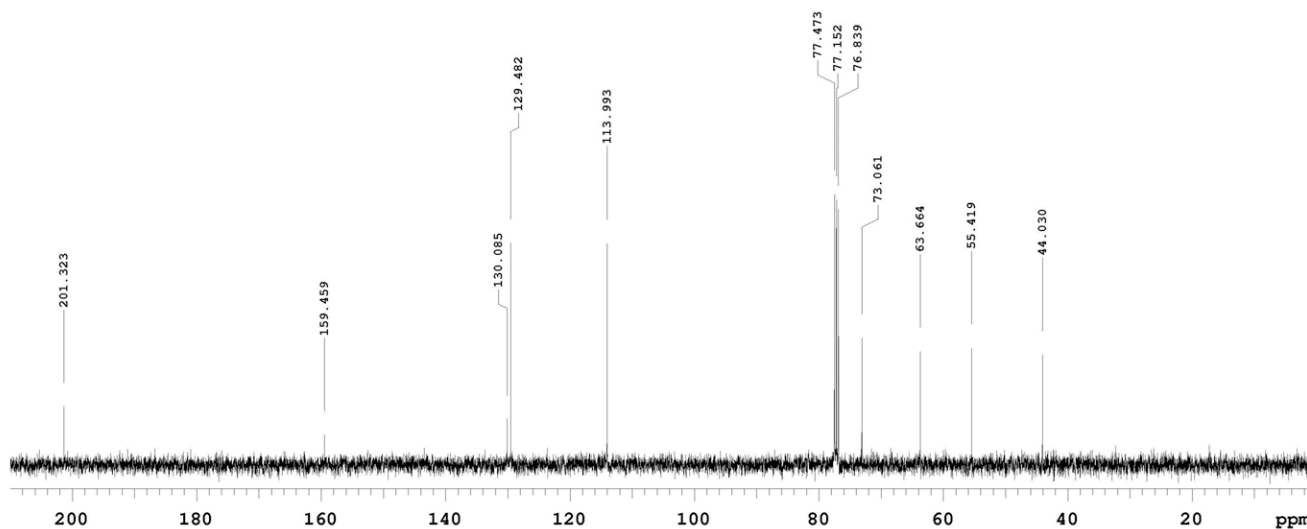

S41

Friis\_1-13\_col\_17-41

Archive directory: /export/home/auto/vnmrsys/data  
Sample directory:

Pulse Sequence: s2pul

Solvent: CDCl<sub>3</sub>  
Temp. 26.0 C / 299.1 K  
File: Friis\_1-13\_col\_17-41  
Mercury-400BB "merc400"

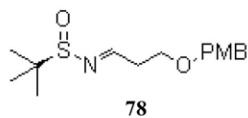

Relax. delay 1.000 sec  
Pulse 45.0 degrees  
Acq. time 1.994 sec  
Width 6410.3 Hz  
8 repetitions  
OBSERVE H1, 400.4698269 MHz  
DATA PROCESSING  
FT size 32768  
Total time 0 min, 25 sec

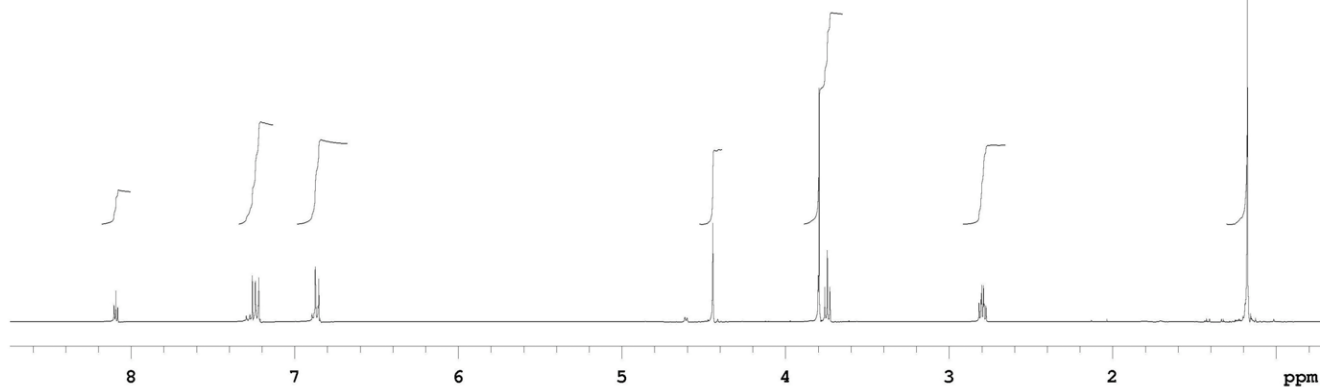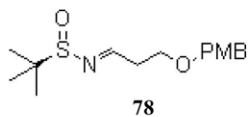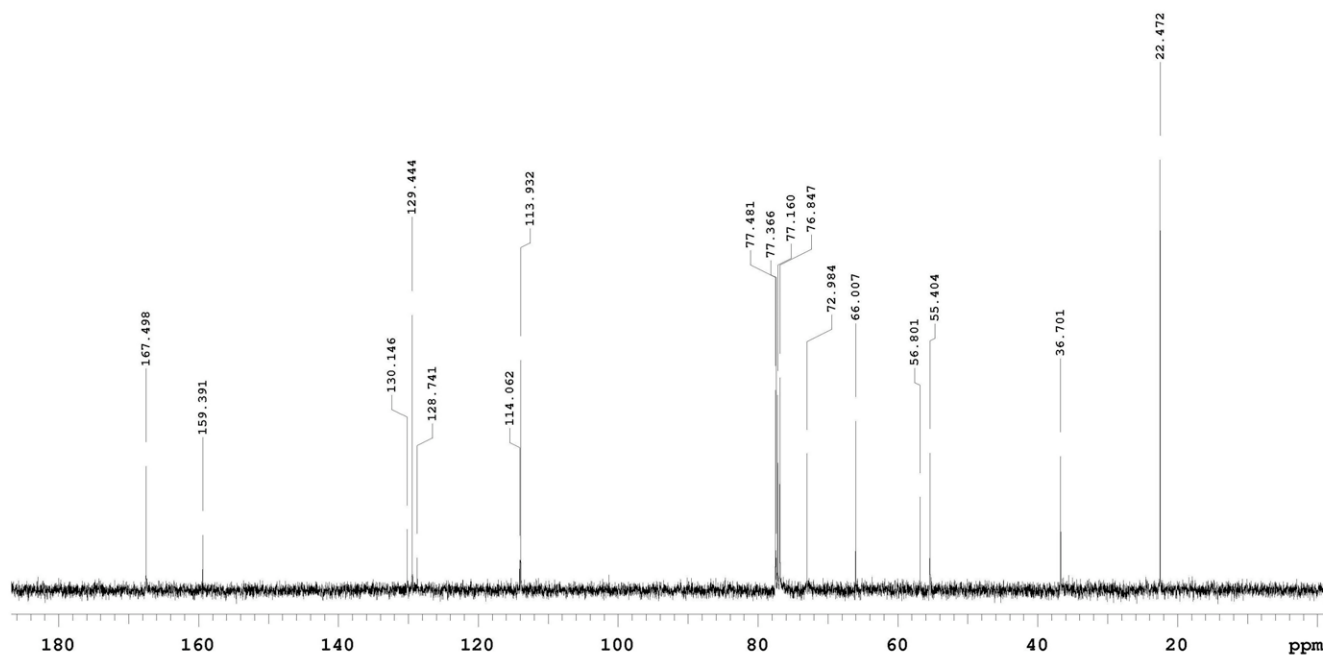

Friis\_1-21\_col\_24-33

Archive directory: /export/home/auto/vnmrsys/data  
Sample directory:

Pulse Sequence: s2pul

Solvent: CDCl<sub>3</sub>

Temp. 26.0 C / 299.1 K

File: Friis\_1-21\_col\_24-33

Mercury-400BB "merc400"

Relax. delay 1.000 sec  
Pulse 45.0 degrees  
Acq. time 1.994 sec  
Width 6410.3 Hz  
8 repetitions  
OBSERVE H1, 400.4698269 MHz  
DATA PROCESSING  
FT size 32768  
Total time 0 min, 25 sec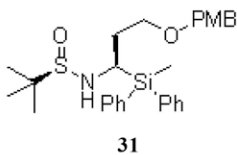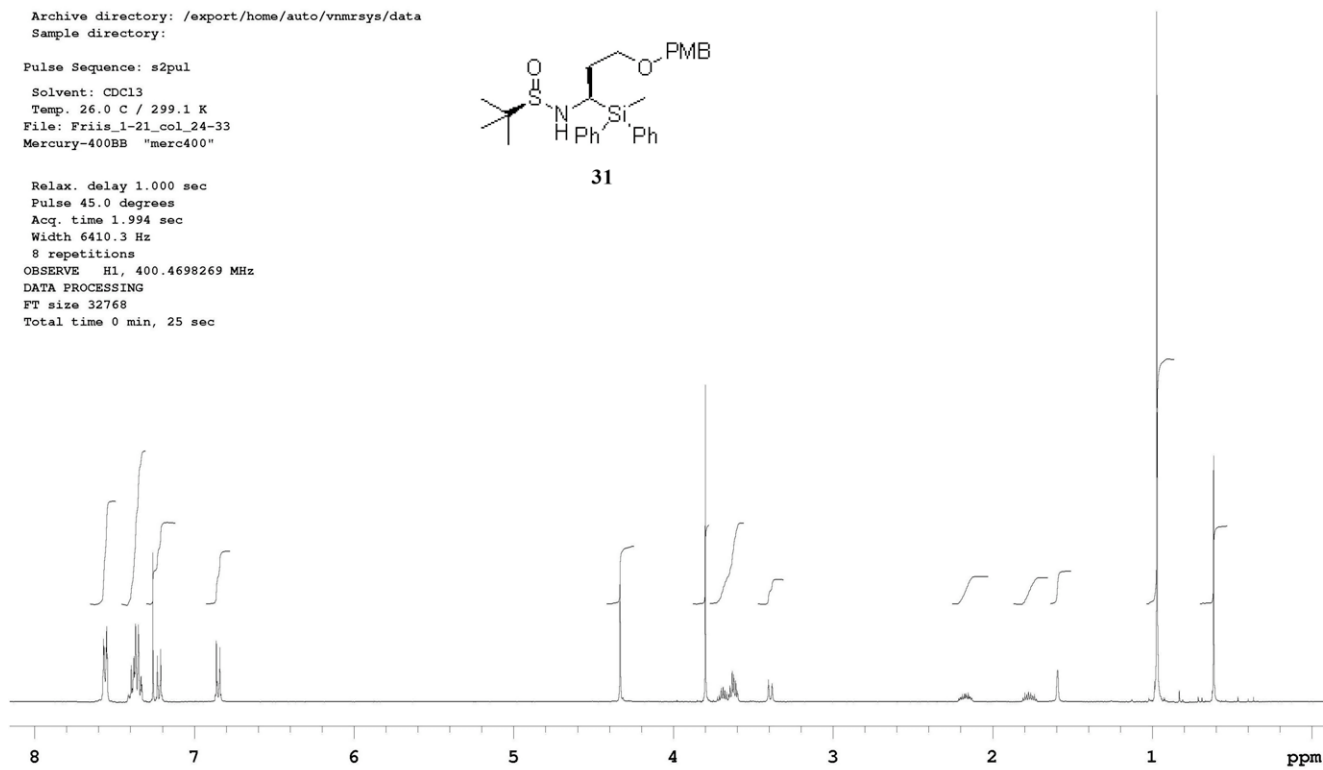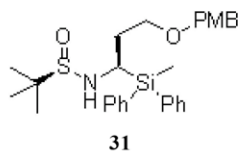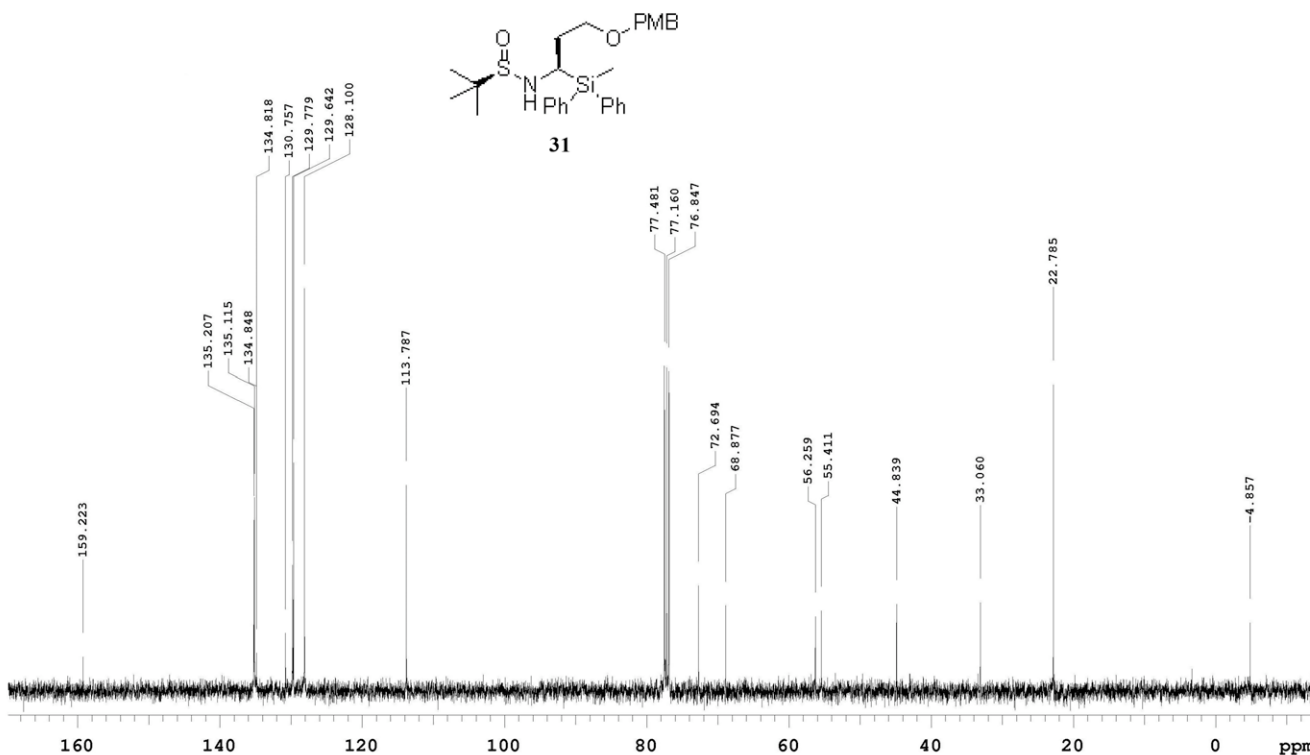

Friis\_l-16\_col\_24-50

Archive directory: /export/home/auto/vnmrsys/data  
Sample directory:

Pulse Sequence: s2pul

Solvent: CDCl<sub>3</sub>  
Temp. 26.0 C / 299.1 K  
File: Friis\_l-16\_col\_24-50  
Mercury-400BB "merc400"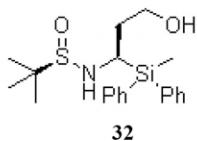Relax. delay 1.000 sec  
Pulse 45.0 degrees  
Acq. time 1.994 sec  
Width 6410.3 Hz  
8 repetitions  
OBSERVE H1, 400.4698269 MHz  
DATA PROCESSING  
FT size 32768  
Total time 0 min, 25 sec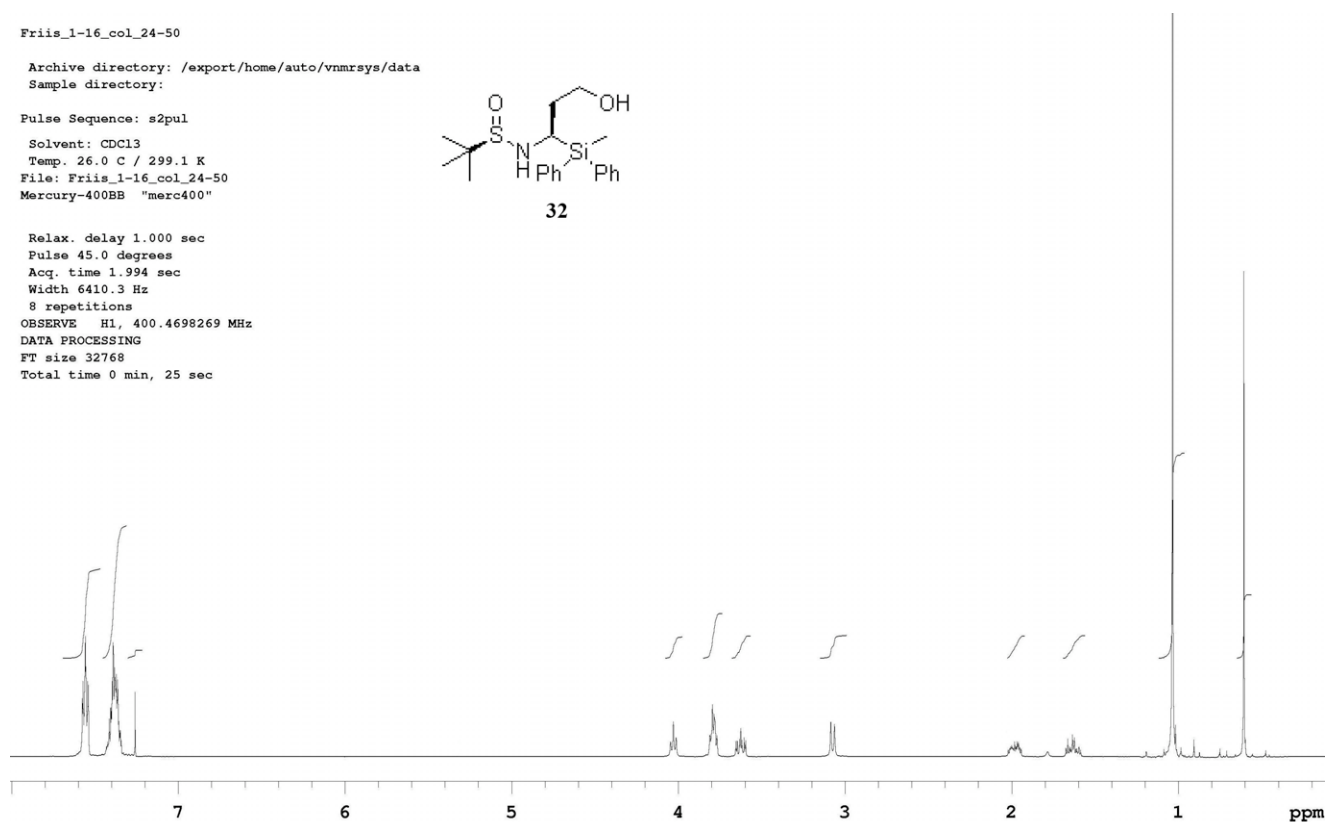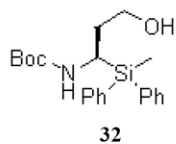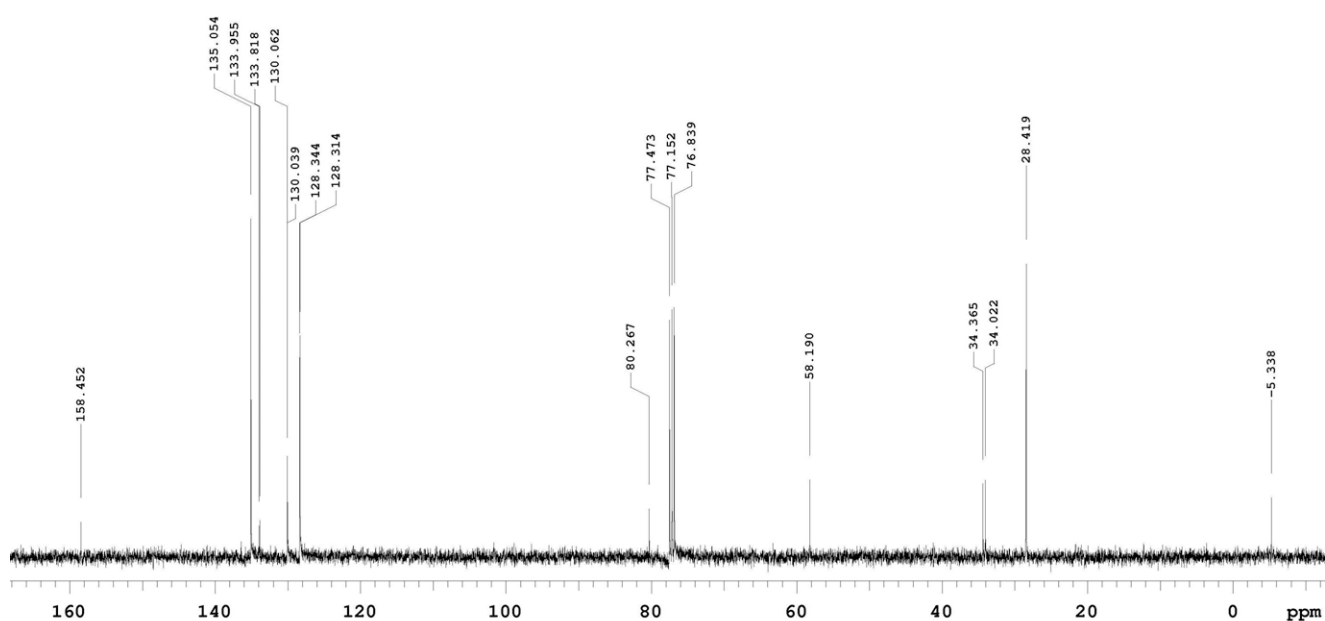

Friis\_1-8\_col\_22-24

expl s2pul

| SAMPLE              |                | SPECIAL |          |
|---------------------|----------------|---------|----------|
| date                | Feb 23 2009    | temp    | 26.0     |
| solvent             | CDCl3          | gain    | not used |
| file                | /export/home/~ | spin    | 20       |
| auto/107/Stig/Frii- | hst            |         | 0.008    |
| s_1-8_col_22-24.fi- | pw90           |         | 11.000   |
| d                   | alfa           |         | -21.025  |

| ACQUISITION |          | FLAGS |          |
|-------------|----------|-------|----------|
| sw          | 6410.3   | il    | n        |
| at          | 1.994    | in    | p        |
| np          | 25560    | dp    | y        |
| fb          | not used | hs    | nn       |
| bs          | 16       |       |          |
| dl          | 1.000    | fn    | not used |
| nt          | 8        |       |          |
| ct          | 8        | sp    | -80.5    |

| TRANSMITTER |         | PROCESSING |        |
|-------------|---------|------------|--------|
| tn          | H1      | wp         | 4084.7 |
| sfrq        | 400.472 | rfl        | 802.3  |
| tof         | 454.8   | rpf        | 0      |
| tpwr        | 56      | lp         | 158.8  |
| pw          | 5.500   |            | 8.5    |

| DECOUPLER |       | PLOT |     |
|-----------|-------|------|-----|
| dn        | C13   | sc   | 270 |
| dof       | 0     | vs   | 0   |
| dm        | nnn   | th   | 53  |
| dmm       | c     | ai   | 46  |
| dpwr      | 46    | cdc  |     |
| dmf       | 17100 | ph   |     |

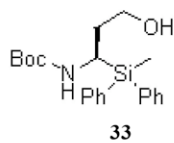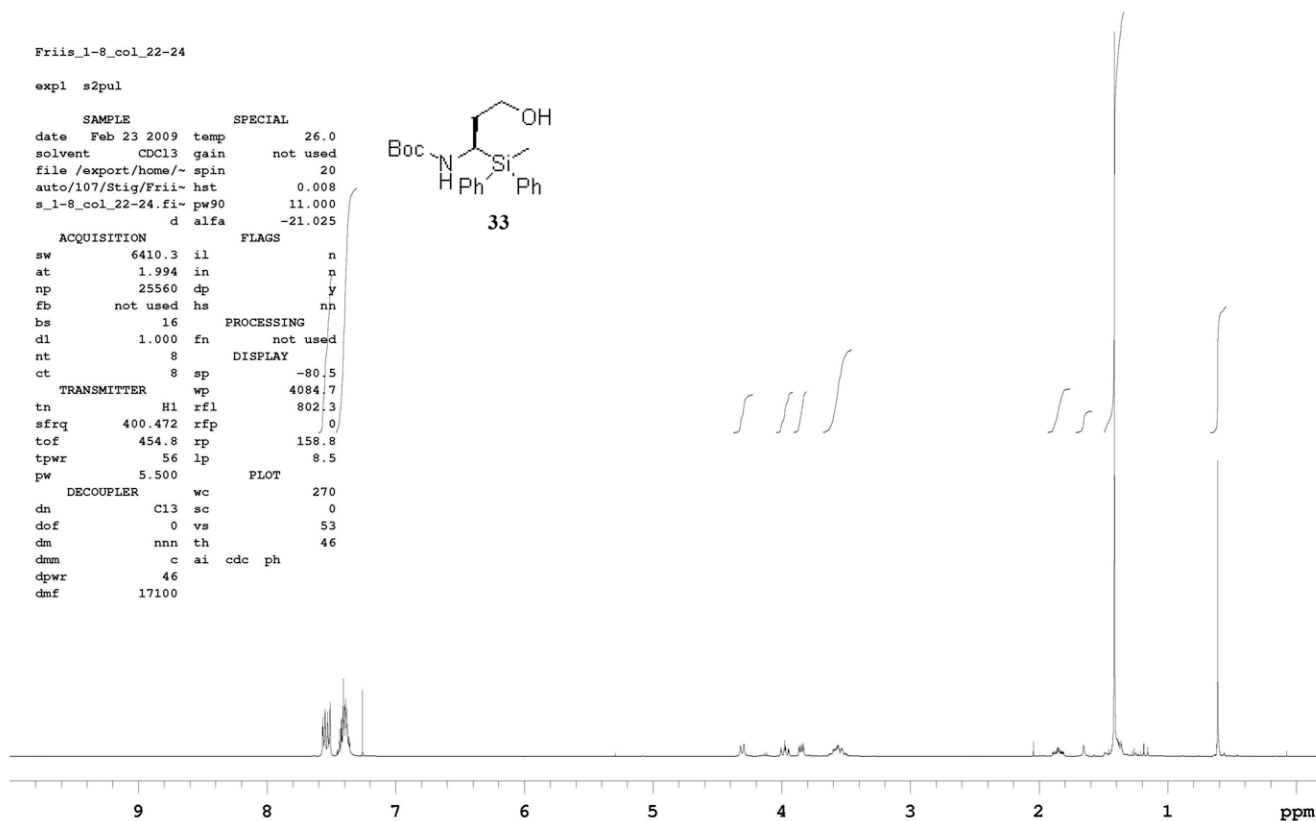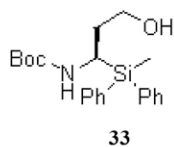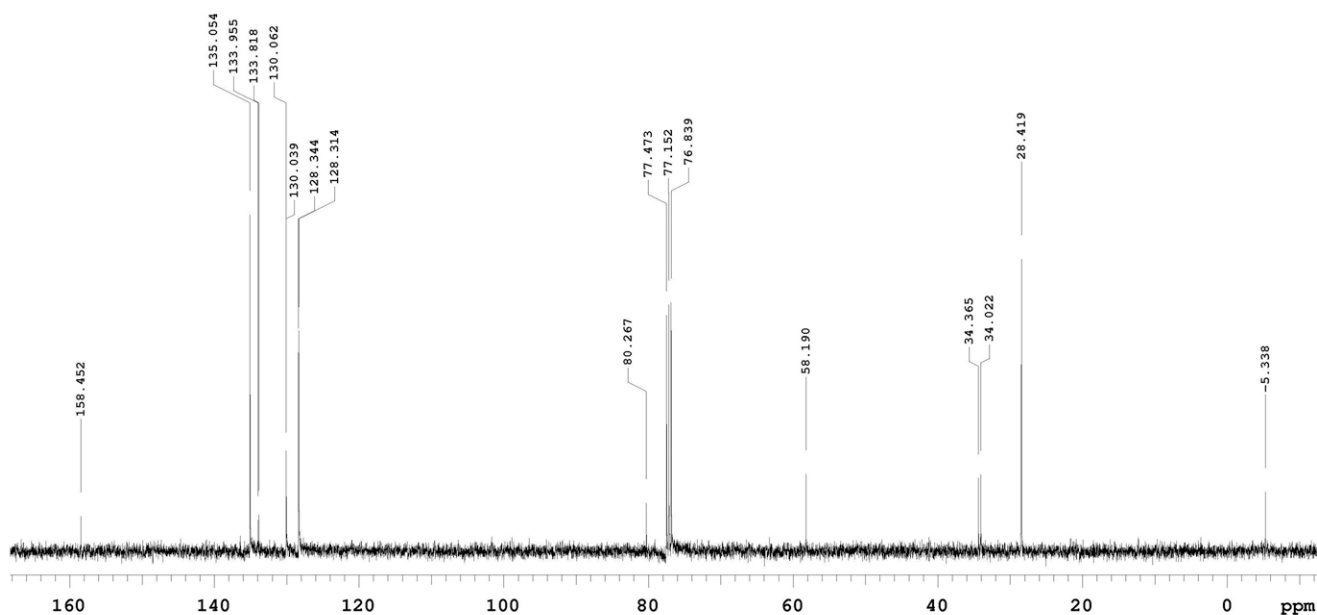



Friis\_1-19\_col\_75-79\_vaciline

Archive directory: /export/home/auto/vnmrsys/data  
Sample directory:

Pulse Sequence: s2pul

Solvent: CDCl<sub>3</sub>

Temp. 26.0 C / 299.1 K

File: Friis\_1-19\_col\_75-79\_vaciline

Mercury-400BB "merc400"

Relax. delay 1.000 sec  
Pulse 45.0 degrees  
Acq. time 1.994 sec  
Width 6410.3 Hz  
16 repetitions  
OBSERVE H1, 400.4698269 MHz  
DATA PROCESSING  
FT size 32768  
Total time 0 min, 50 sec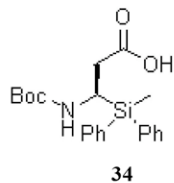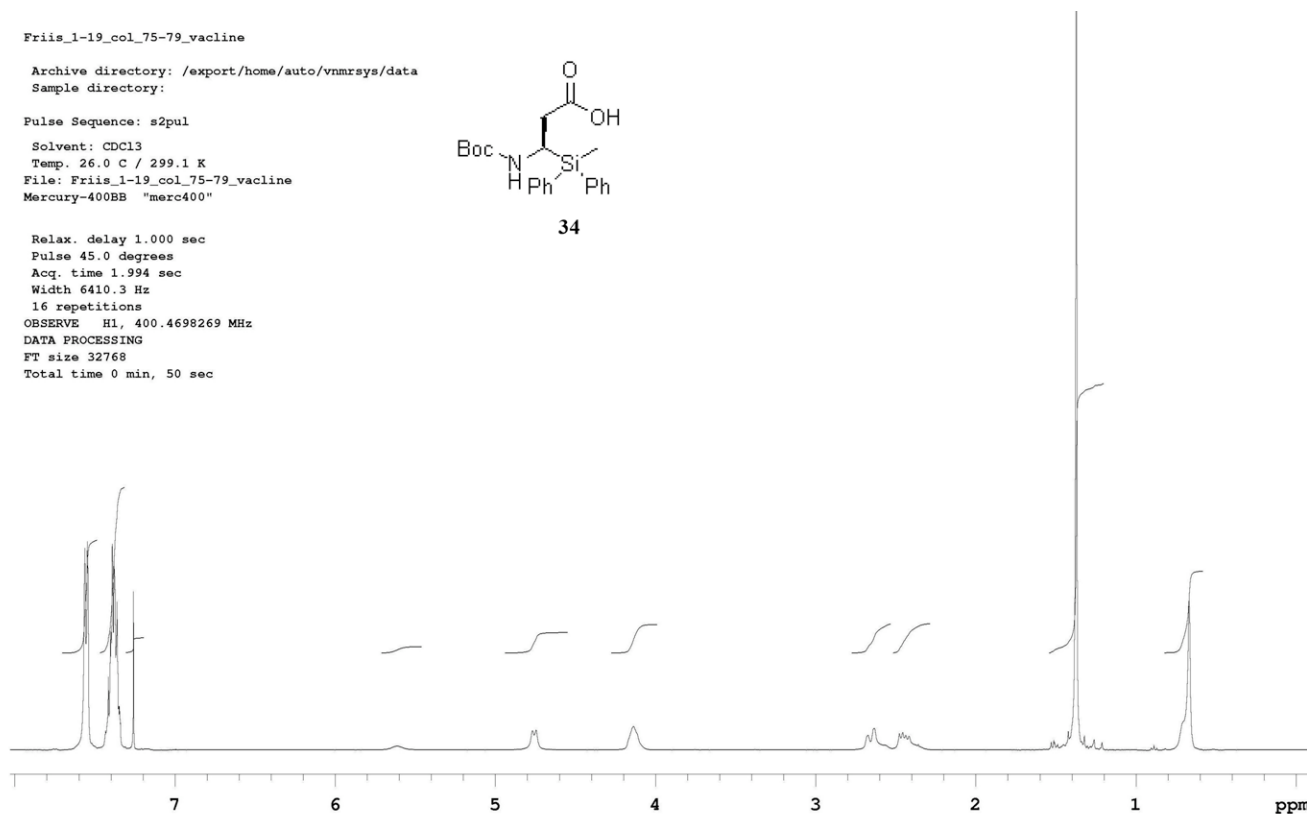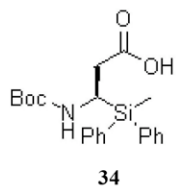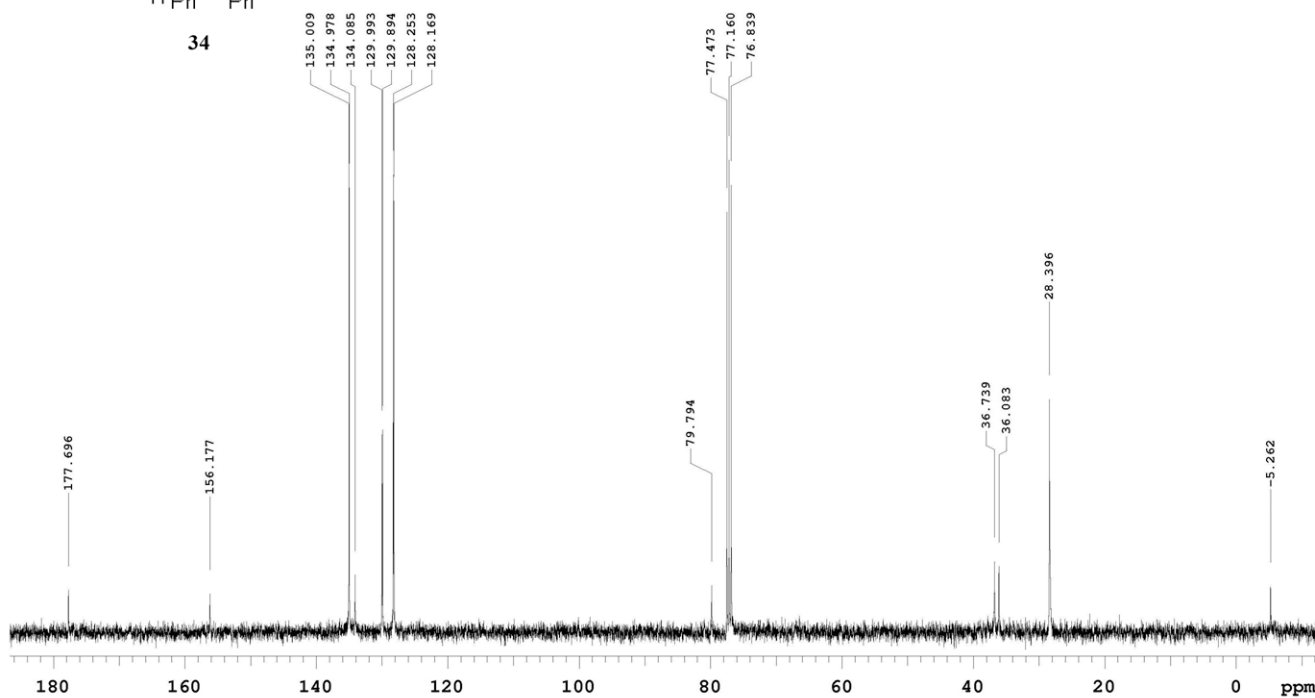

Friis\_1-20\_col\_30-35\_vacline

Archive directory: /export/home/auto/vnmrsys/data  
Sample directory:

Pulse Sequence: s2pul

Solvent: CDCl<sub>3</sub>

Temp. 26.0 C / 299.1 K

File: Friis\_1-20\_col\_30-35\_vacline

Mercury-400BB "merc400"

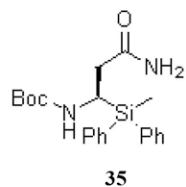Relax. delay 1.000 sec  
Pulse 45.0 degrees  
Acq. time 1.994 sec  
Width 6410.3 Hz  
8 repetitions  
OBSERVE H1, 400.4698269 MHz  
DATA PROCESSING  
FT size 32768  
Total time 0 min, 25 sec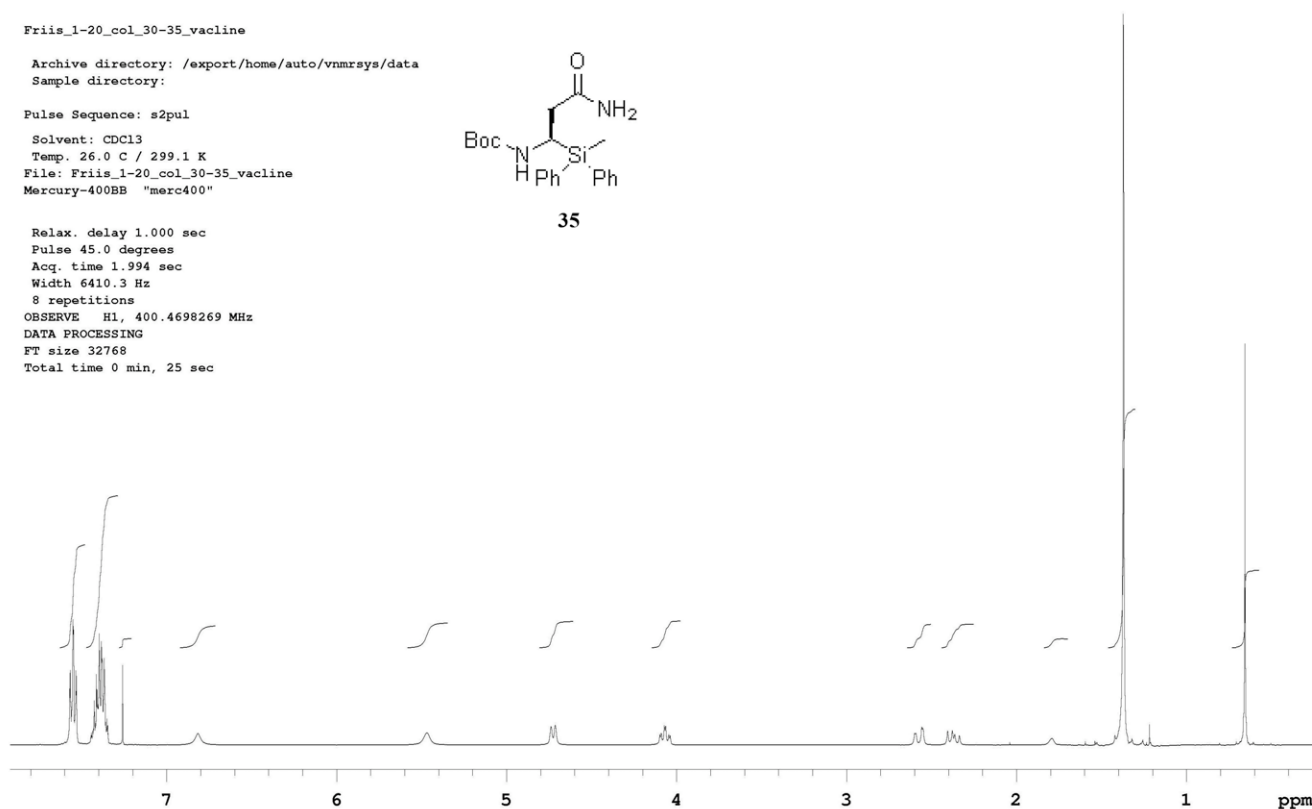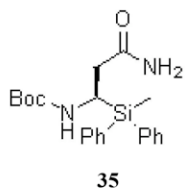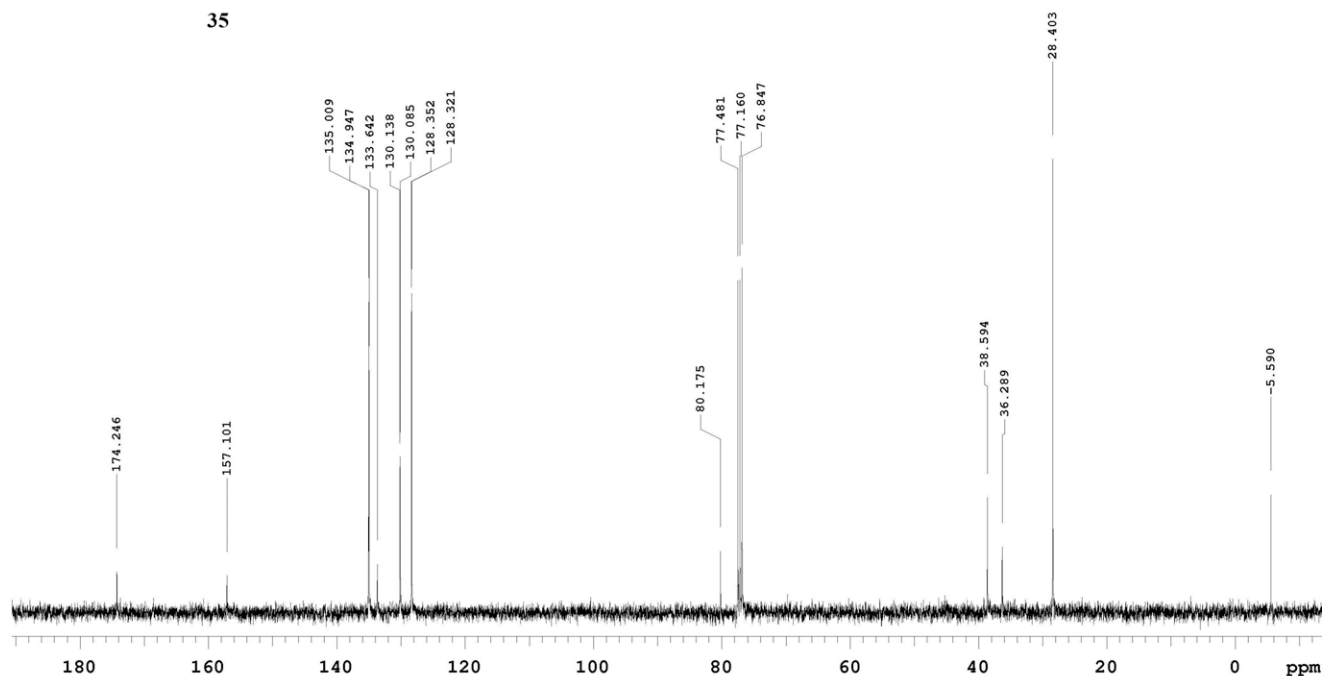

S47

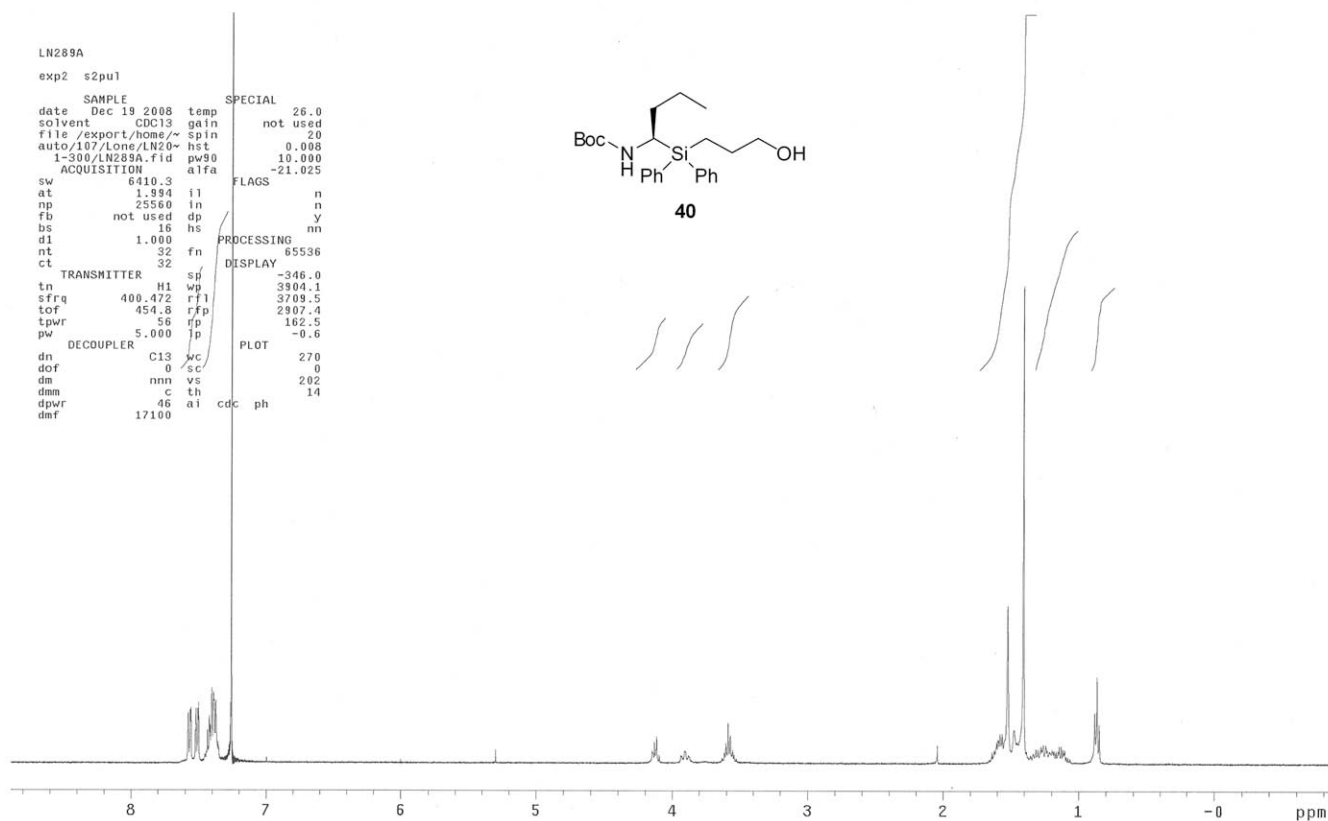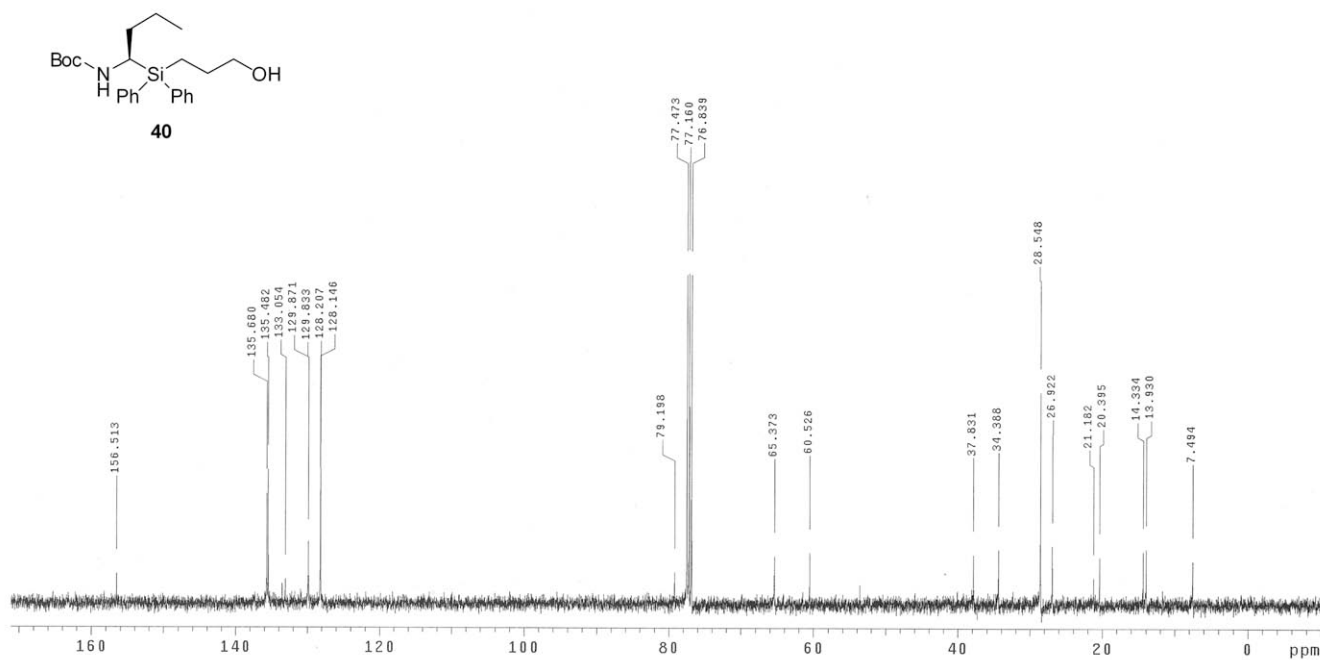

S48

LN304A

Archive directory: /export/home/auto/vnmr/sys/data  
Sample directory:

Pulse Sequence: s2pul

Solvent: CDCl<sub>3</sub>

Temp. 25.0 C / 299.1 K

File: LN304A-solvent

Mercury-400BB "merc400"

Relax. delay 1.000 sec

Pulse 45.0 degrees

Acq. time 1.994 sec

Width 6410.3 Hz

8 repetitions

OBSERVE H1, 400.4698260 MHz

DATA PROCESSING

FT size 65536

Total time 0 min, 25 sec

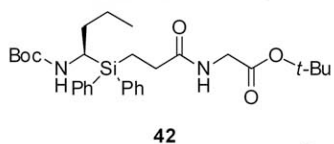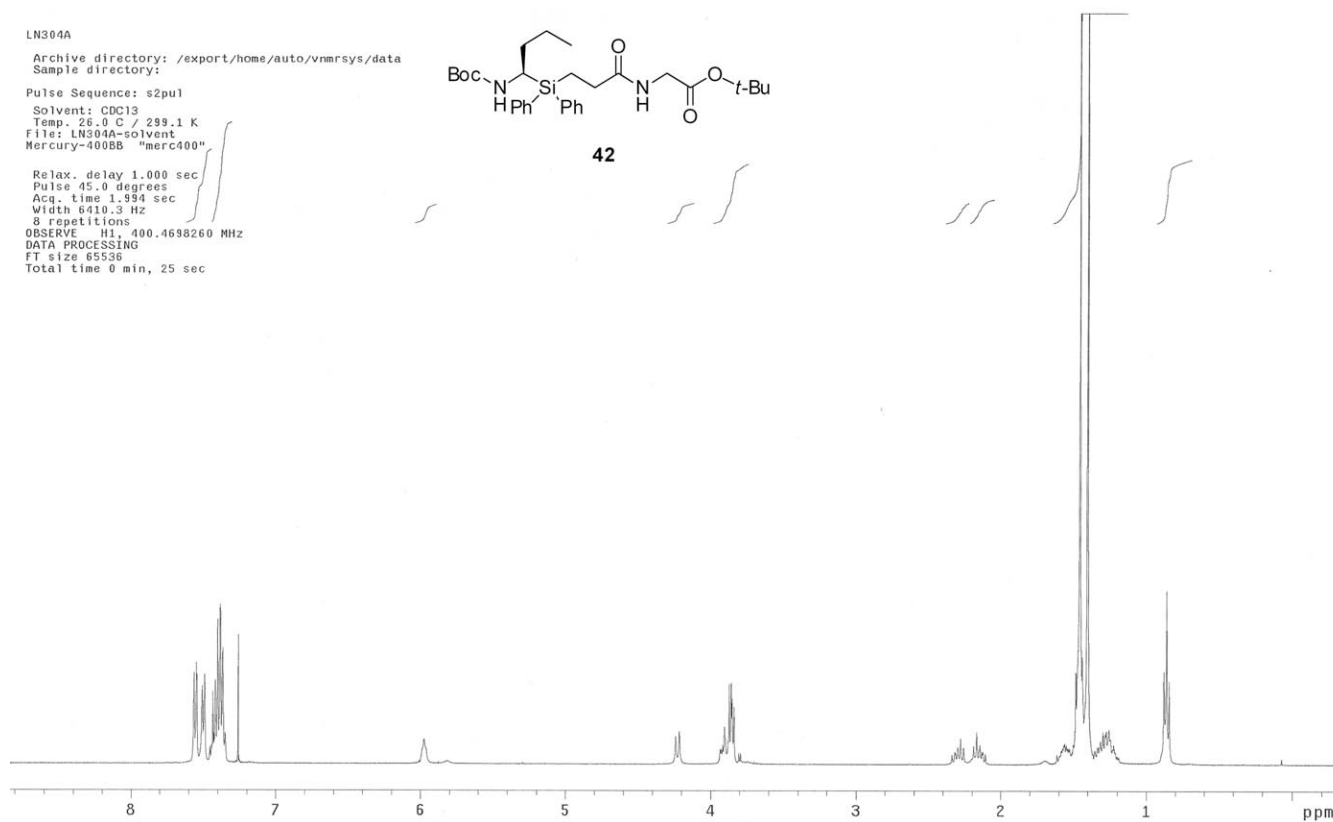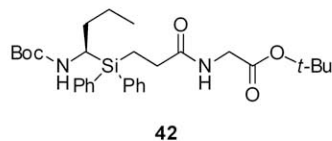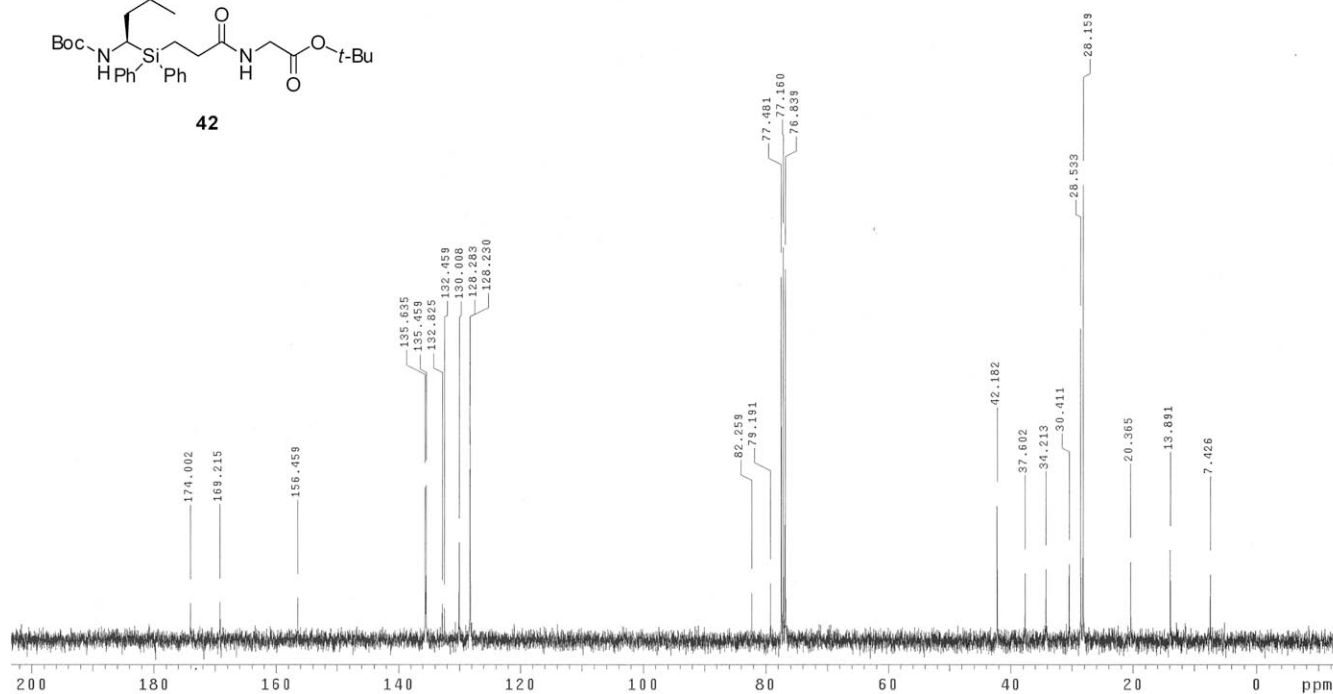

S49

LN292A

Archive directory: /export/home/auto/vnmrsys/data  
Sample directory:

Pulse Sequence: s2pul

Solvent: CDCl<sub>3</sub>

Temp. 25.0 C / 299.1 K

File: LN292A

Mercury-400BB "merc400"

Relax. delay 1.000 sec  
Pulse 45.0 degrees  
Acq. time 1.994 sec  
Width 6410.3 Hz  
8 repetitions  
OBSERVE H1 400.4698264 MHz  
DATA PROCESSING  
FT size 65536  
Total time 0 min, 25 sec

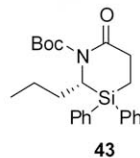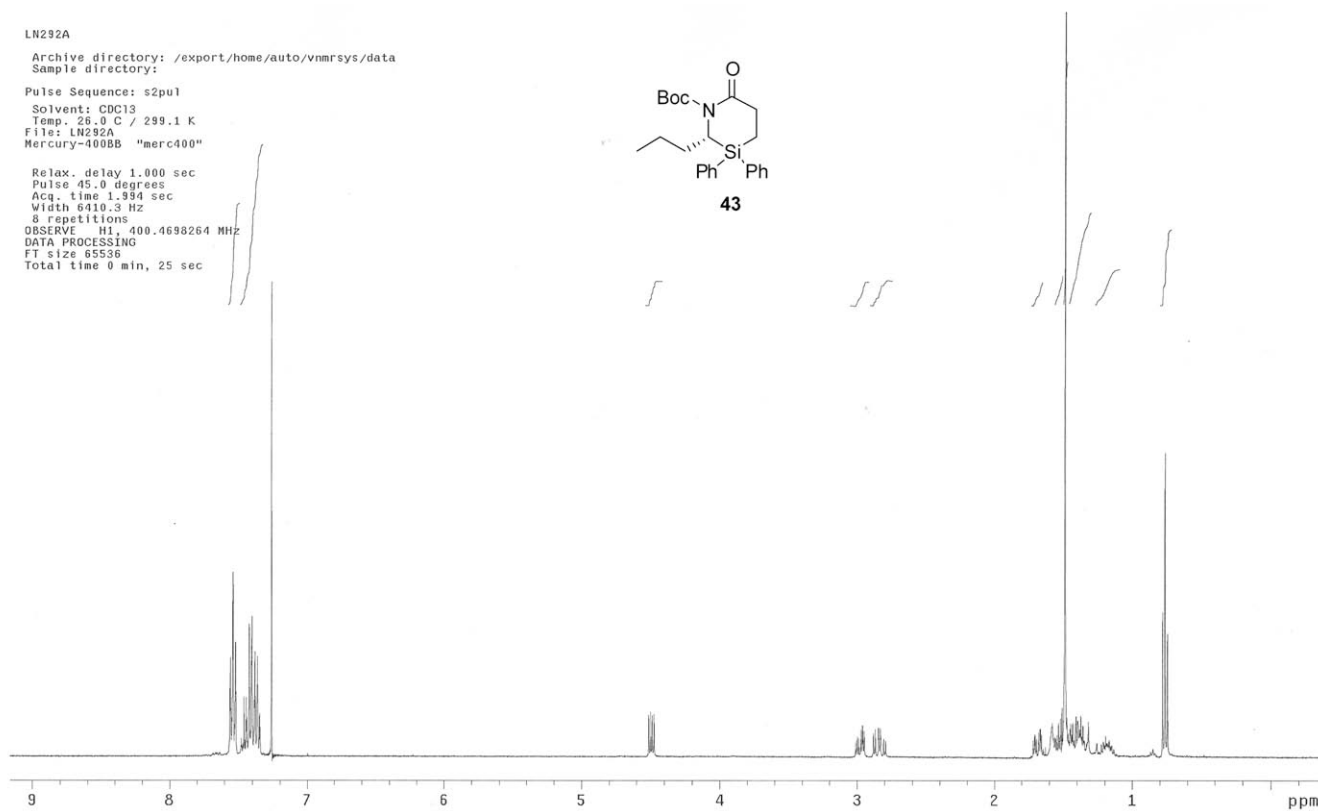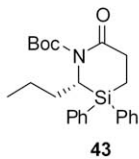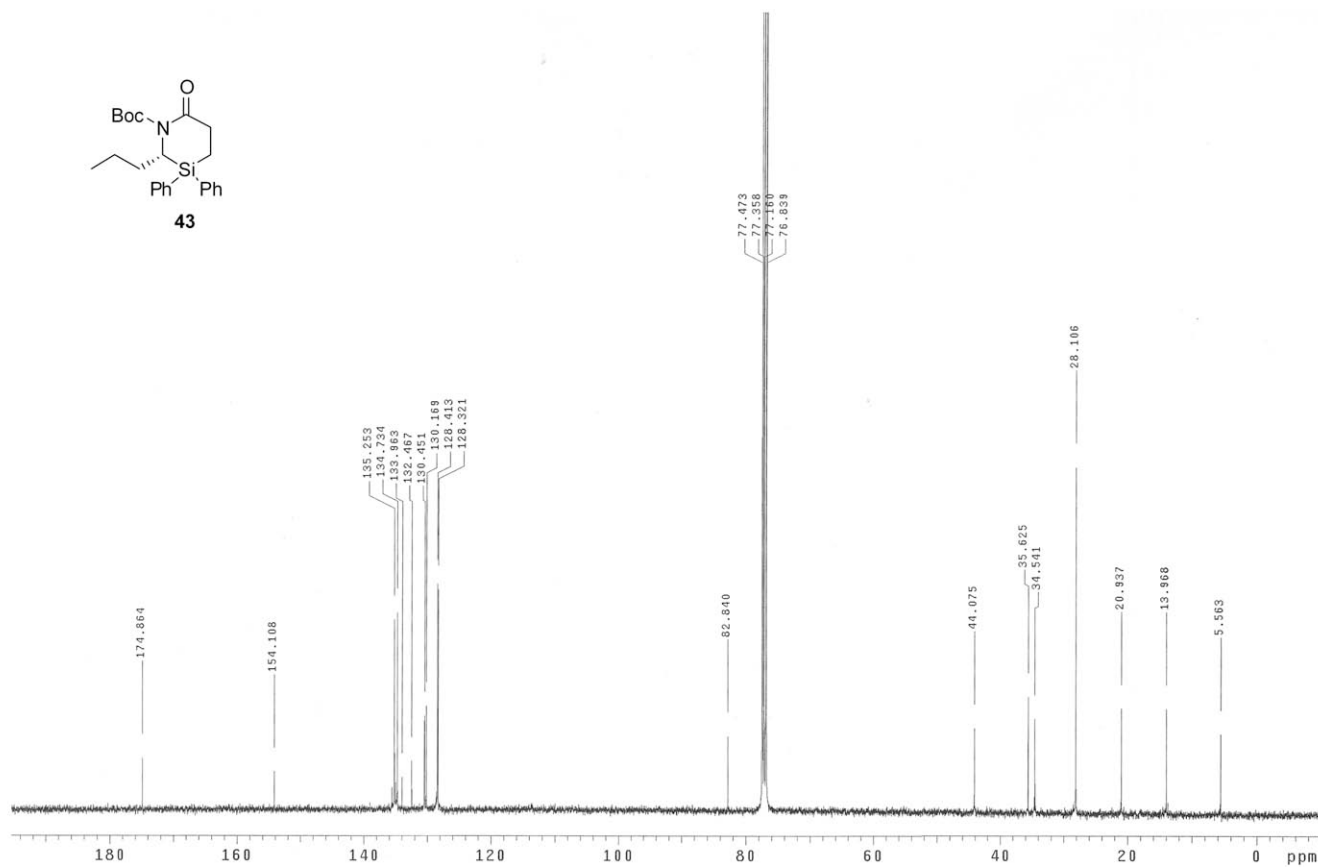

S50

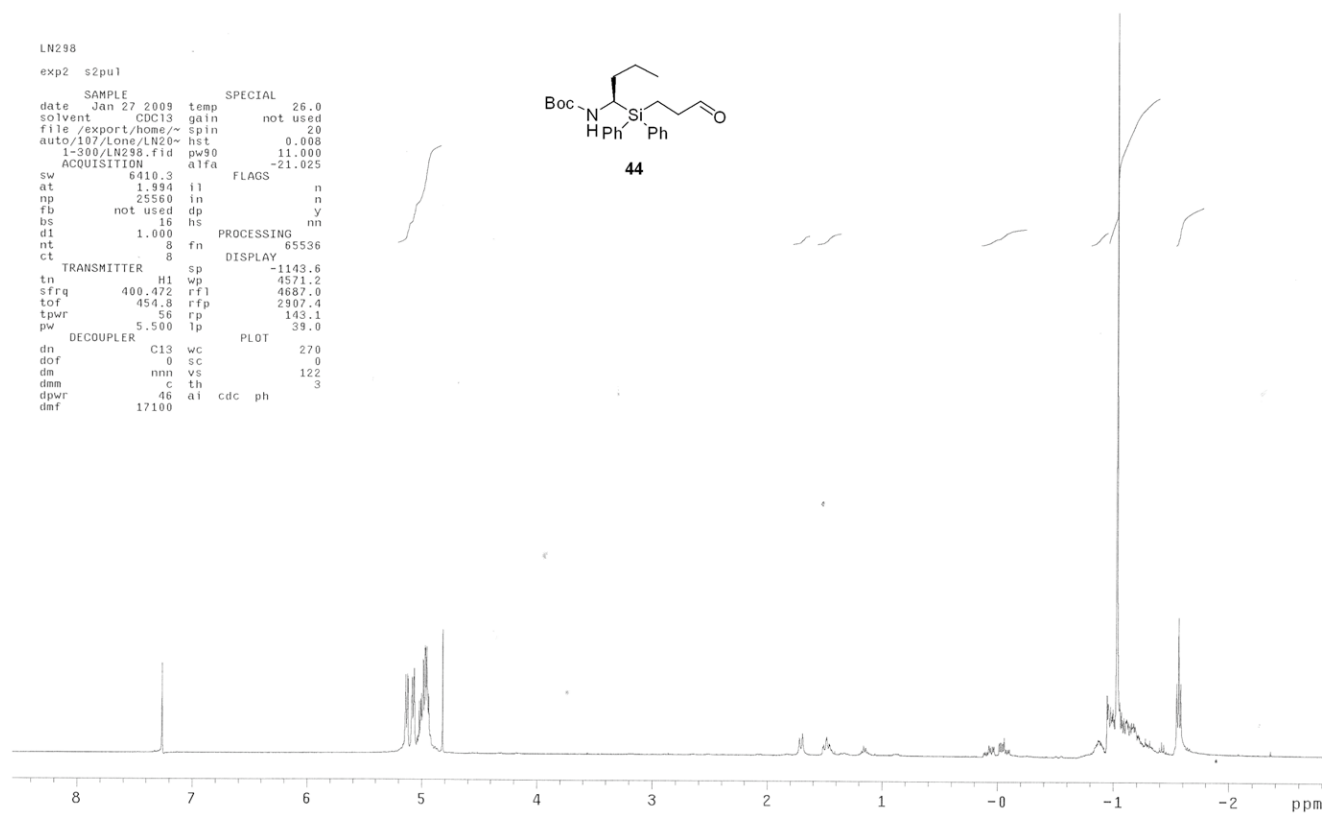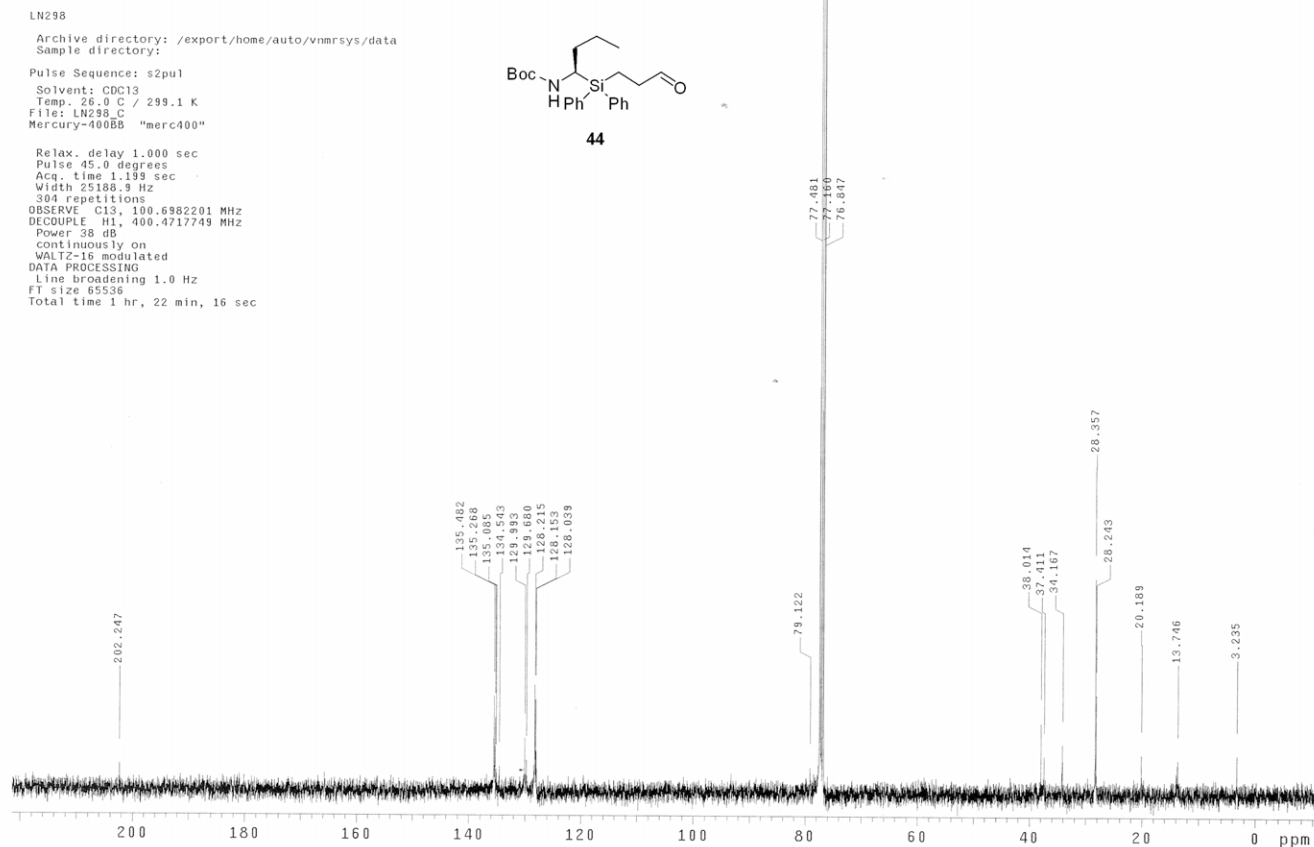

S51

kb1557a20\_24

Archive directory: /export/home/auto/vnmrsys/data  
Sample directory:

Pulse Sequence: s2pul

Solvent: CDCl3  
Temp. 26.0 C / 299.1 K  
File: kb1557a20\_24  
Mercury-400BB "merc400"

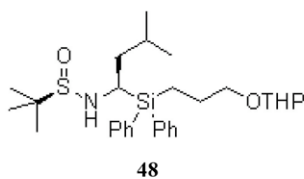

Relax. delay 1.000 sec  
Pulse 45.0 degrees  
Acq. time 1.994 sec  
Width 6410.3 Hz  
8 repetitions  
OBSERVE H1, 400.4698269 MHz  
DATA PROCESSING  
FT size 32768  
Total time 0 min, 25 sec

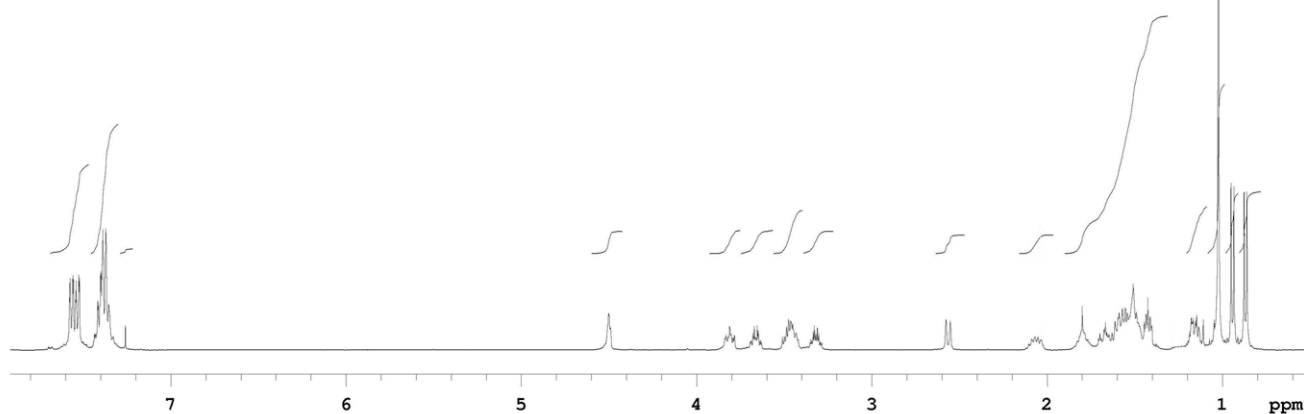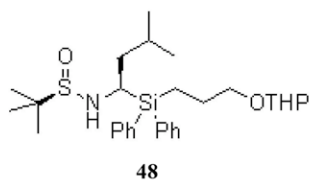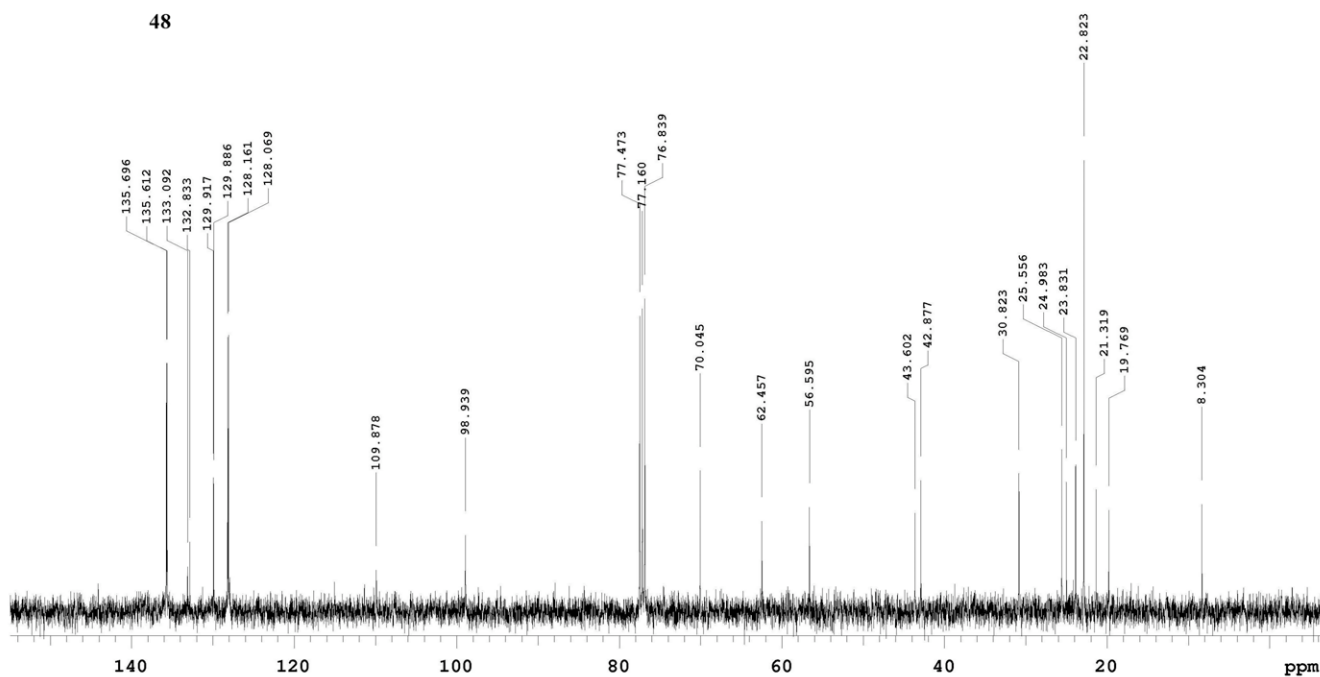

kbl559a16\_21

Archive directory: /export/home/auto/vnmrsys/data  
 Sample directory:

Pulse Sequence: s2pul

Solvent: CDCl<sub>3</sub>

Temp. 26.0 C / 299.1 K

File: kbl559a16\_21

Mercury-400BB "merc400"

Relax. delay 1.000 sec

Pulse 45.0 degrees

Acq. time 1.994 sec

Width 6410.3 Hz

8 repetitions

OBSERVE H1, 400.4698269 MHz

DATA PROCESSING

FT size 32768

Total time 0 min, 25 sec

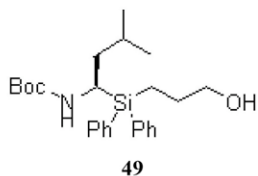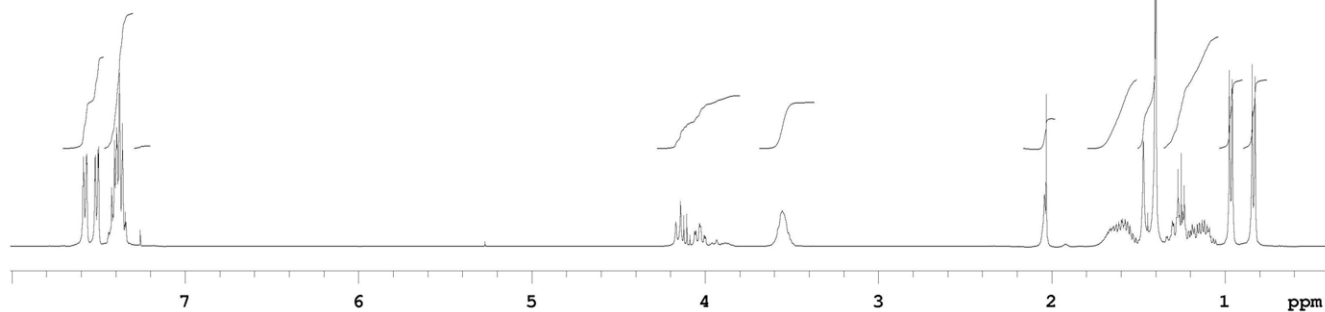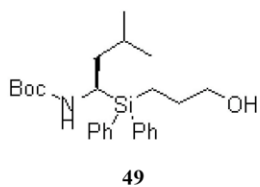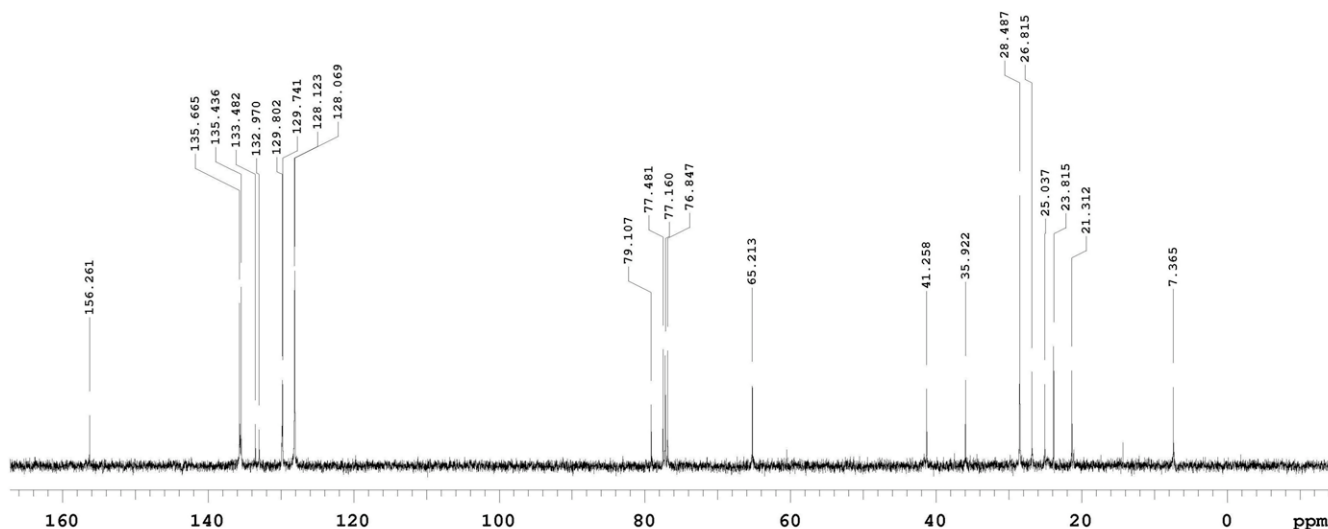



kbl561a17\_22\_2nd

Archive directory: /export/home/auto/vnmrsys/data  
Sample directory:

Pulse Sequence: s2pul

Solvent: CDCl3

Temp. 26.0 C / 299.1 K

File: kbl561a17\_22\_2nd

Mercury-400BB "merc400"

Relax. delay 1.000 sec

Pulse 45.0 degrees

Acq. time 1.994 sec

Width 6410.3 Hz

8 repetitions

OBSERVE H1, 400.4698269 MHz

DATA PROCESSING

FT size 32768

Total time 0 min, 25 sec

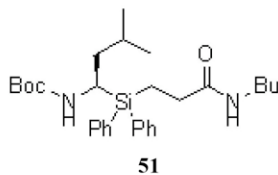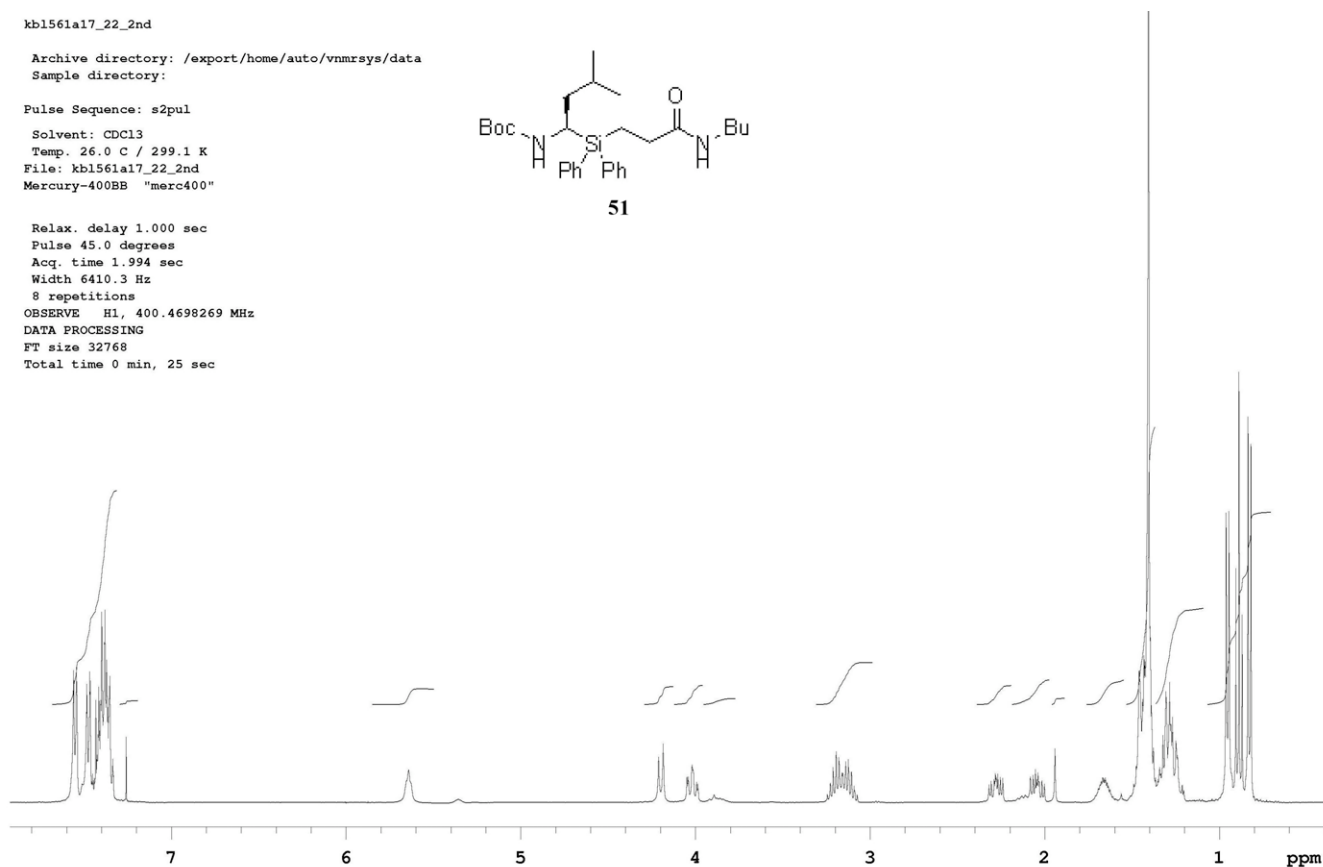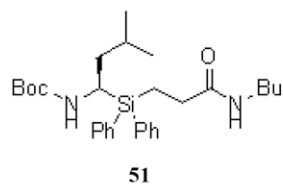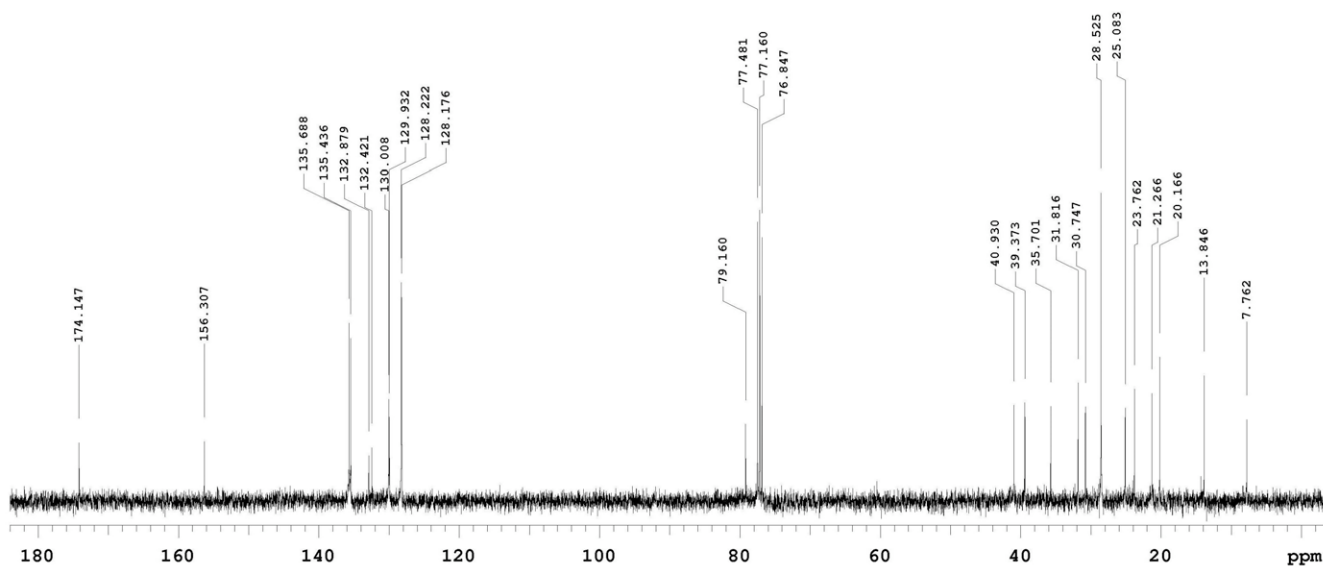

S54

kb1563a19\_24

Archive directory: /export/home/auto/vnmrsys/data  
Sample directory:

Pulse Sequence: s2pul

Solvent: CDCl3

Temp. 26.0 C / 299.1 K

File: kb1563a19\_24

Mercury-400BB "merc400"

Relax. delay 1.000 sec

Pulse 45.0 degrees

Acq. time 1.994 sec

Width 6410.3 Hz

8 repetitions

OBSERVE H1, 400.4698269 MHz

DATA PROCESSING

FT size 32768

Total time 0 min, 25 sec

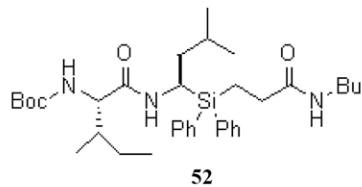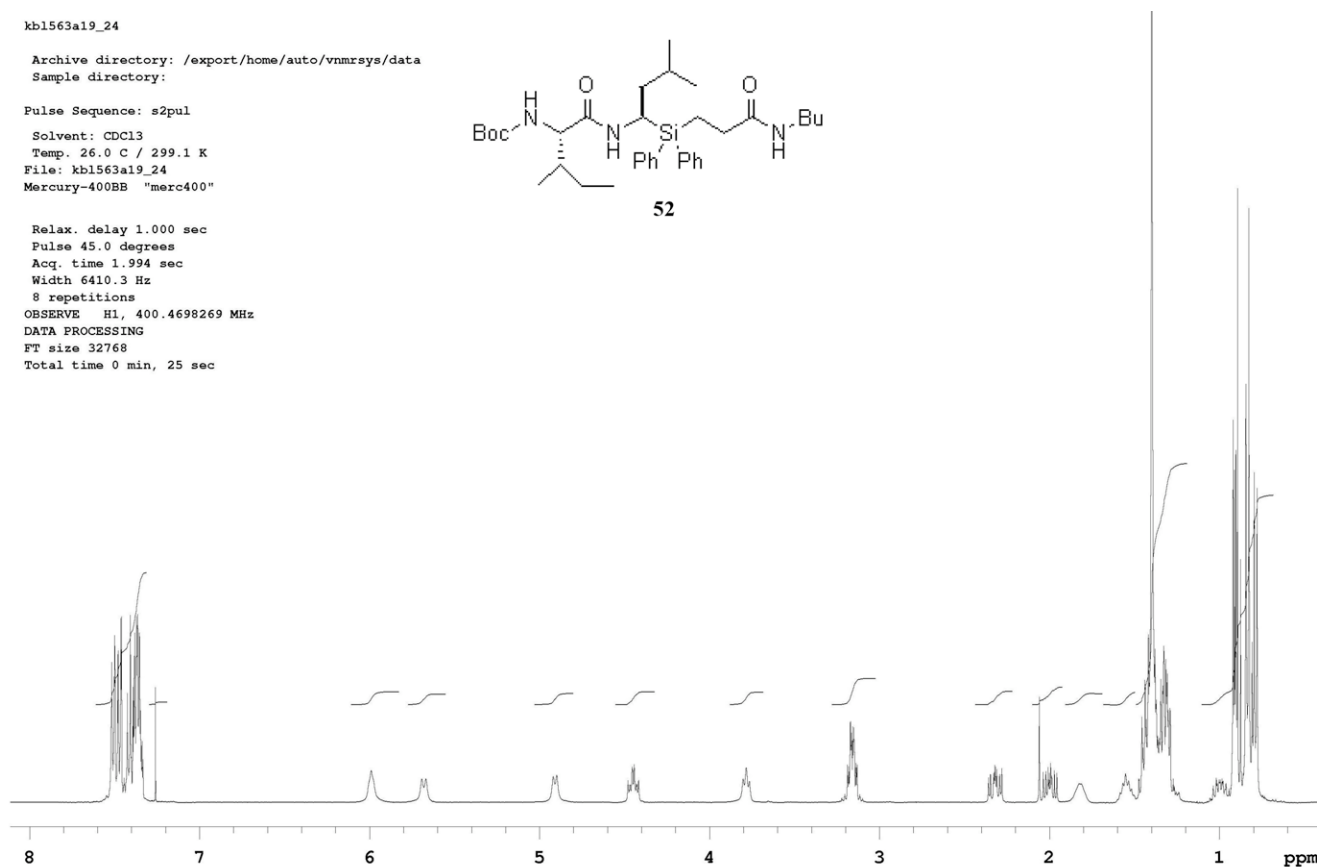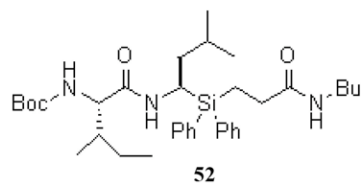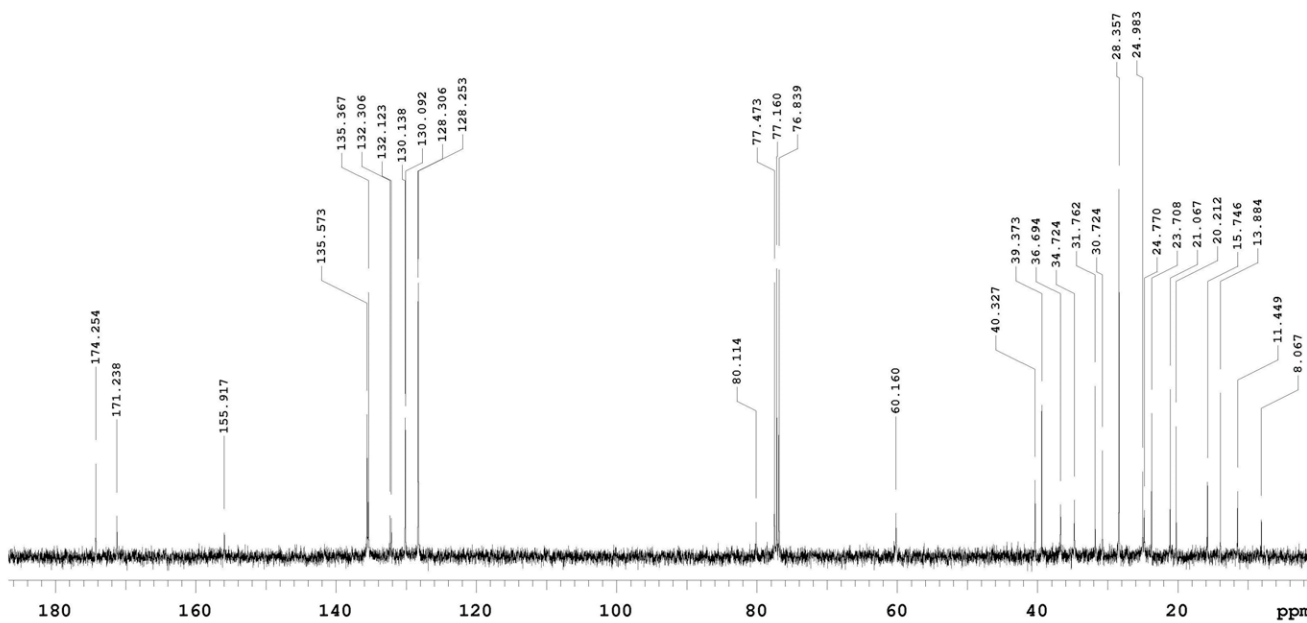

kbl565a7\_8

Archive directory: /export/home/auto/vnmrsys/data  
 Sample directory:

Pulse Sequence: s2pul

Solvent: CDCl<sub>3</sub>

Temp. 26.0 C / 299.1 K

File: kbl565a7\_8

Mercury-400BB "merc400"

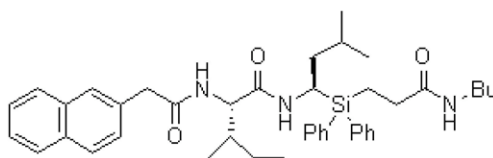

53

Relax. delay 1.000 sec  
 Pulse 45.0 degrees  
 Acq. time 1.994 sec  
 Width 6410.3 Hz  
 8 repetitions  
 OBSERVE H1, 400.4698269 MHz  
 DATA PROCESSING  
 FT size 32768  
 Total time 0 min, 25 sec

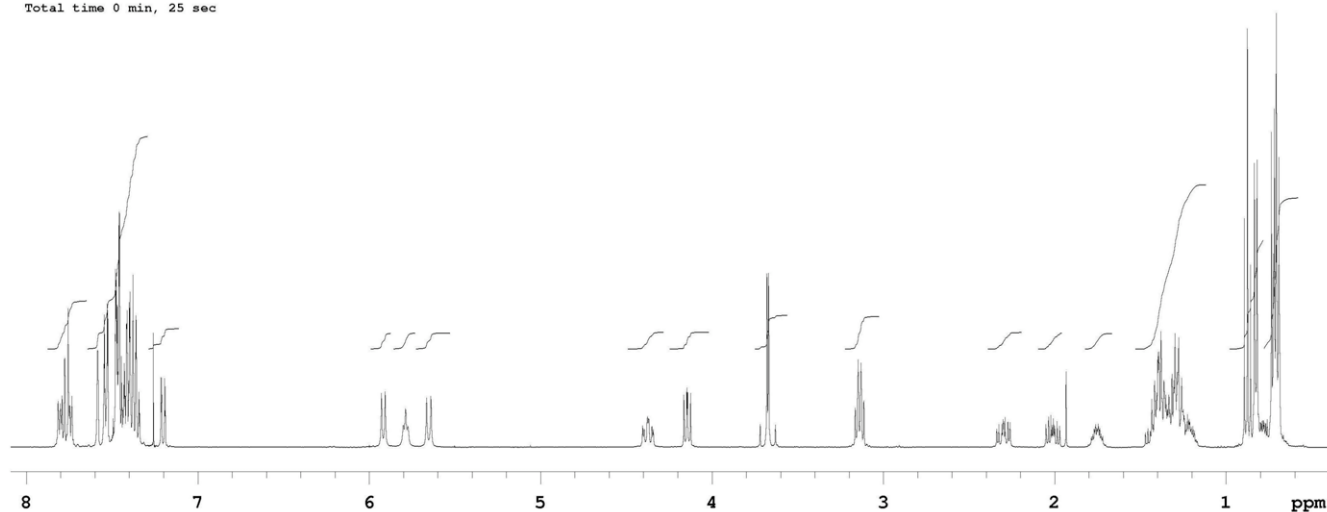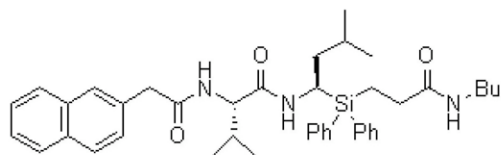

53

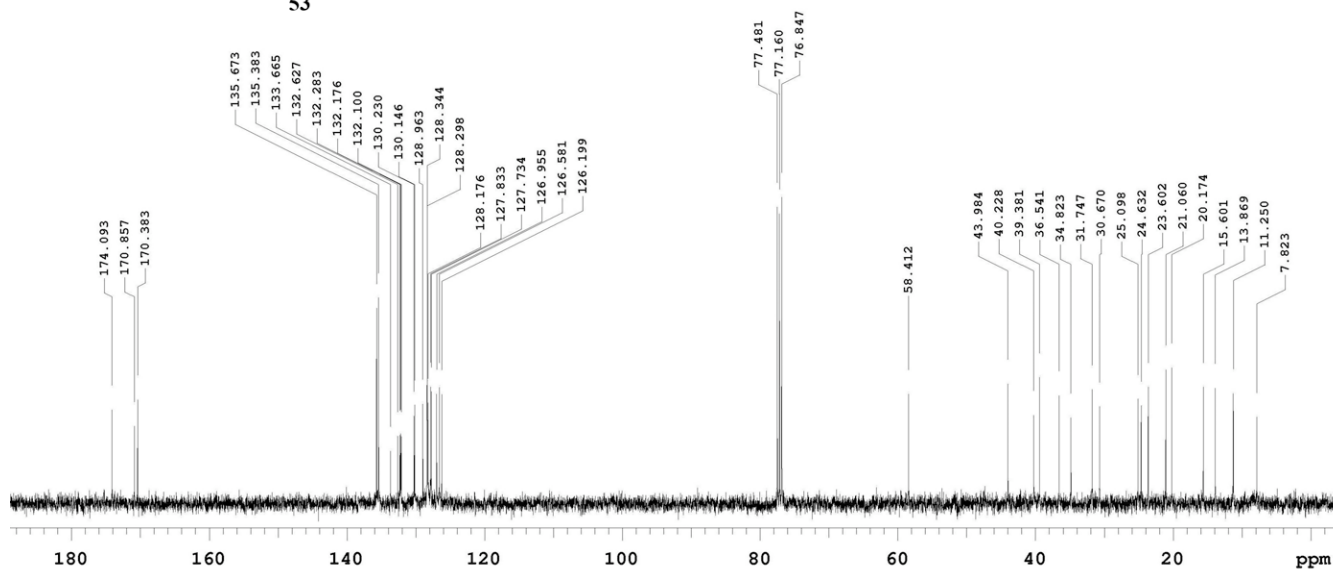

S56

D1-60-P

expl s2pu1

| SAMPLE            |               | SPECIAL    |          |
|-------------------|---------------|------------|----------|
| date              | Dec 16 2009   | temp       | 26.0     |
| solvent           | CDCl3         | gain       | not used |
| file              | /export/home/ | spin       | 20       |
| auto/107/Dacil/D1 | hst           | 0.008      |          |
| 60-P-H.Fid        | pw90          | 11.000     |          |
| ACQUISITION       |               | alfa       | -21.025  |
| sw                | 6410.3        |            |          |
| at                | 1.994         | il         | n        |
| np                | 25560         | in         | n        |
| fb                | not used      | dp         | y        |
| bs                | 16            | hs         | nn       |
| d1                | 1.000         | PROCESSING |          |
| nt                | 16            | fn         | not used |
| ct                | 16            | DISPLAY    |          |
| TRANSMITTER       |               | sp         | -310.2   |
| tn                | H1            | wp         | 4101.1   |
| sfrq              | 400.472       | rf1        | 3709.1   |
| tof               | 454.8         | rpf        | 2307.4   |
| tpwr              | 56            | rp         | 137.3    |
| pw                | 5.500         | lp         | 2.4      |
| DECOUPLER         |               | PLOT       |          |
| dn                | C13           | wc         | 270      |
| dof               | 0             | sc         | 0        |
| dm                | nnn           | vs         | 73       |
| dmm               | c             | th         | 1        |
| dpwr              | 46            | ai         | cdc ph   |
| dmf               | 17100         |            |          |

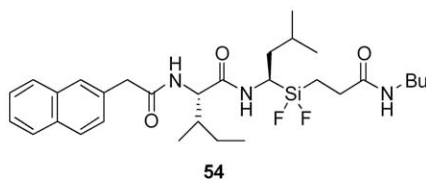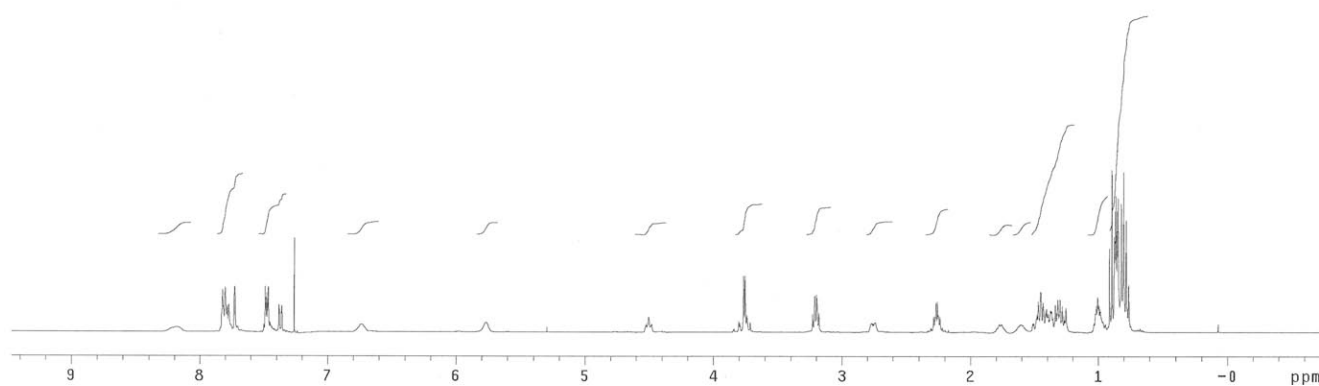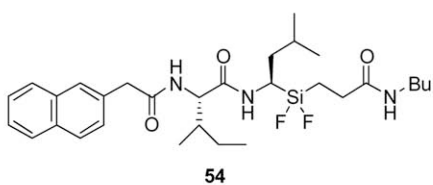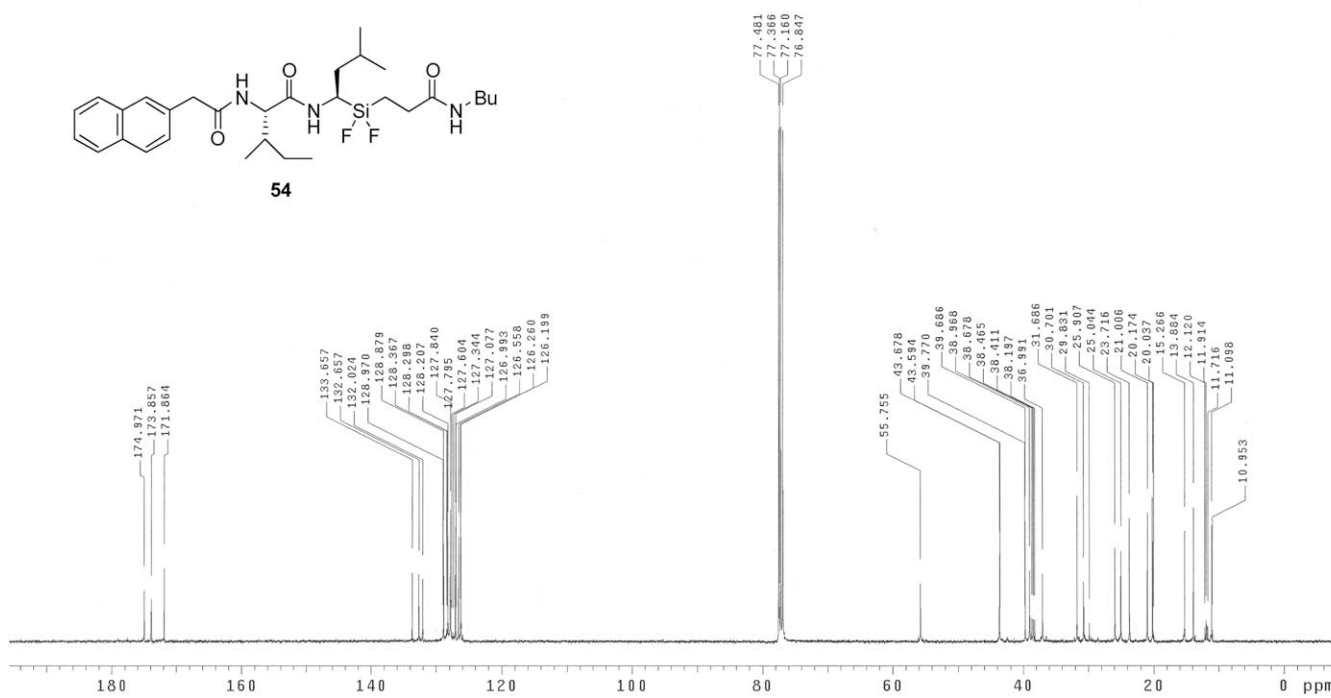

D1-61-P

expl s2pu1

|             |             |            |          |
|-------------|-------------|------------|----------|
| SAMPLE      |             | SPECIAL    |          |
| date        | Jan 15 2010 | temp       | 26.0     |
| solvent     | D2O         | gain       | not used |
| file        | exp         | spin       | 20       |
| ACQUISITION |             | hst        | 0.008    |
| sw          | 6410.3      | pw90       | 11.000   |
| at          | 1.994       | alfa       | -21.025  |
| np          | 25560       | FLAGS      |          |
| fb          | not used    | il         | n        |
| bs          | 16          | in         | n        |
| d1          | 1.000       | dp         | y        |
| nt          | 32          | hs         | nn       |
| ct          | 32          | PROCESSING |          |
| TRANSMITTER |             | fn         | not used |
| tn          | H1          | DISPLAY    |          |
| sfrq        | 400.473     | sp         | -556.9   |
| tof         | 454.8       | wp         | 4312.4   |
| tpwr        | 56          | rfl        | 1668.3   |
| pw          | 5.500       | rfg        | 825.0    |
| DECOUPLER   |             | rp         | 161.4    |
| dn          | C13         | lp         | -3.5     |
| dof         | 0           | PLOT       |          |
| dm          | nnn         | wc         | 270      |
| dmm         | c           | sc         | 0        |
| dpwr        | 46          | vs         | 172      |
| dmf         | 17100       | th         | 0        |
|             | al          | cdc        | ph       |

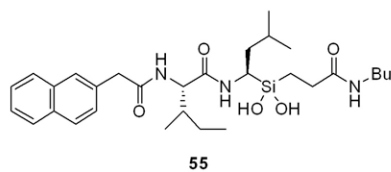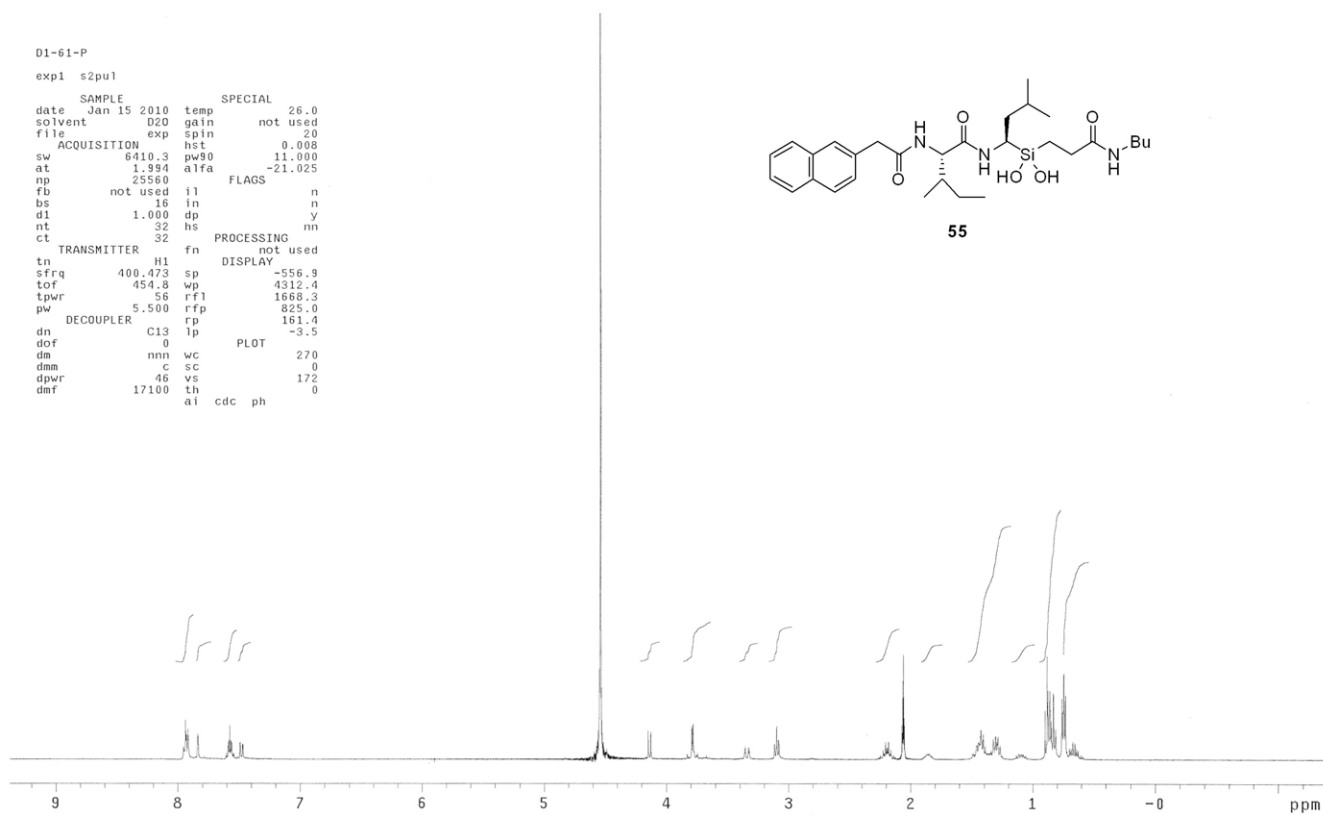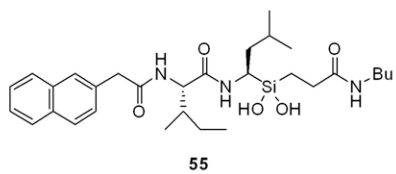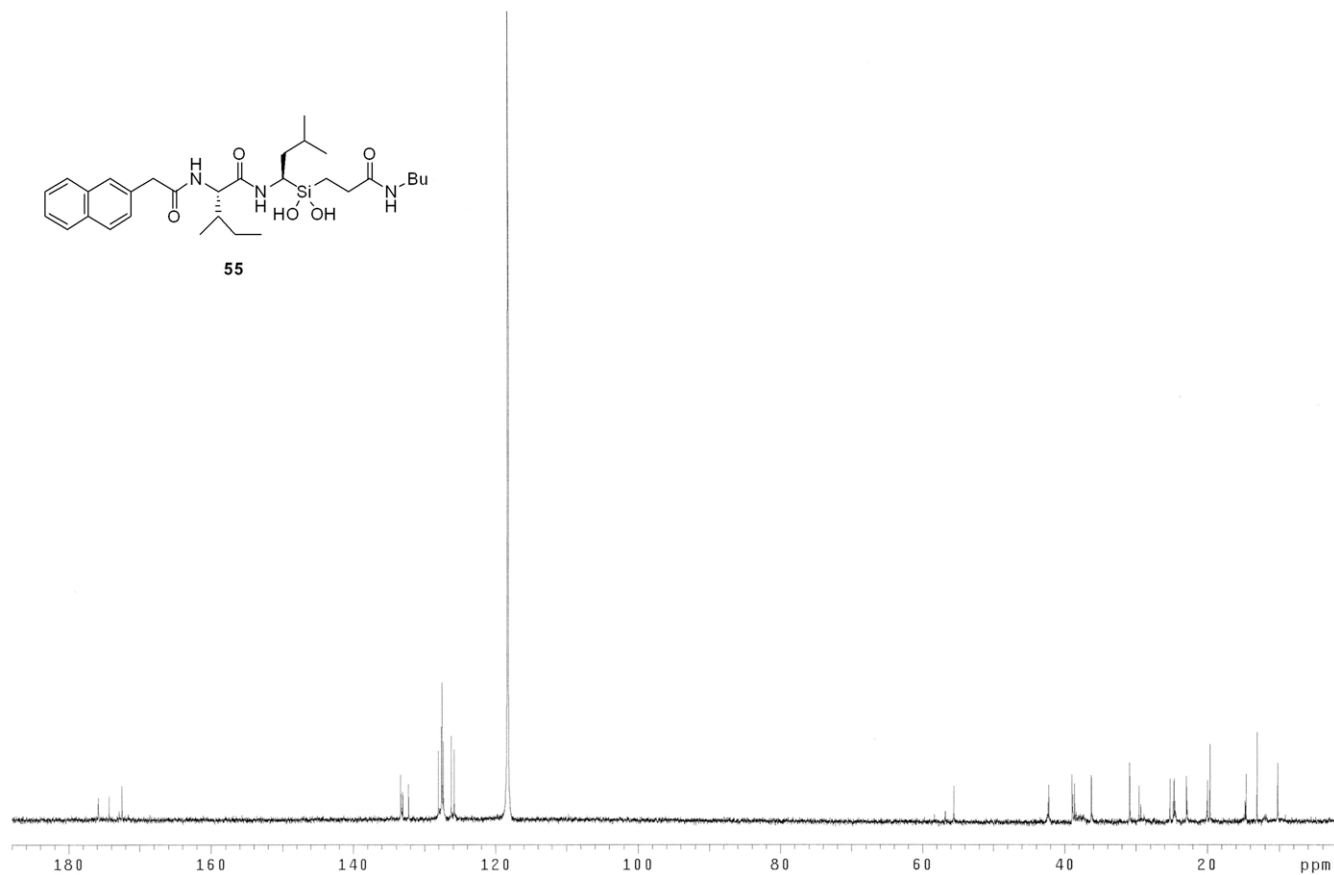

S58

tm-289\_19-20

expl s2pul

| SAMPLE              |                | SPECIAL |          |
|---------------------|----------------|---------|----------|
| date                | Jul 13 2009    | temp    | 26.0     |
| solvent             | CDCl3          | gain    | not used |
| file                | /export/home/~ | spin    | 20       |
| auto/107/Tina/200~  |                | hst     | 0.008    |
| 299/tm-289_19-20.f~ |                | pw90    | 11.000   |
|                     | id             | alfa    | -21.025  |

| ACQUISITION |          | FLAGS      |          |
|-------------|----------|------------|----------|
| sw          | 6410.3   | il         | n        |
| at          | 1.994    | in         | n        |
| np          | 25560    | dp         | y        |
| fb          | not used | hs         | nn       |
| bs          | 16       | PROCESSING |          |
| dl          | 1.000    | fn         | not used |
| nt          | 8        | DISPLAY    |          |
| ct          | 8        | sp         | -31.9    |

| TRANSMITTER |         | PLOT |       |
|-------------|---------|------|-------|
| tn          | H1      | rf1  | 802.3 |
| sfrq        | 400.472 | rfp  | 0     |
| tof         | 454.8   | rp   | 161.1 |
| tpwr        | 56      | lp   | 7.8   |
| pw          | 5.500   |      |       |

| DECOUPLER |       | PLOT |        |
|-----------|-------|------|--------|
| dn        | C13   | sc   | 0      |
| dof       | 0     | vs   | 120    |
| dm        | nnn   | th   | 20     |
| dmm       | c     | nm   | cdc ph |
| dpwr      | 46    |      |        |
| dmf       | 17100 |      |        |

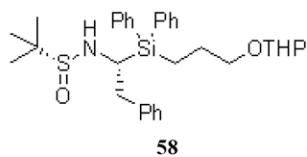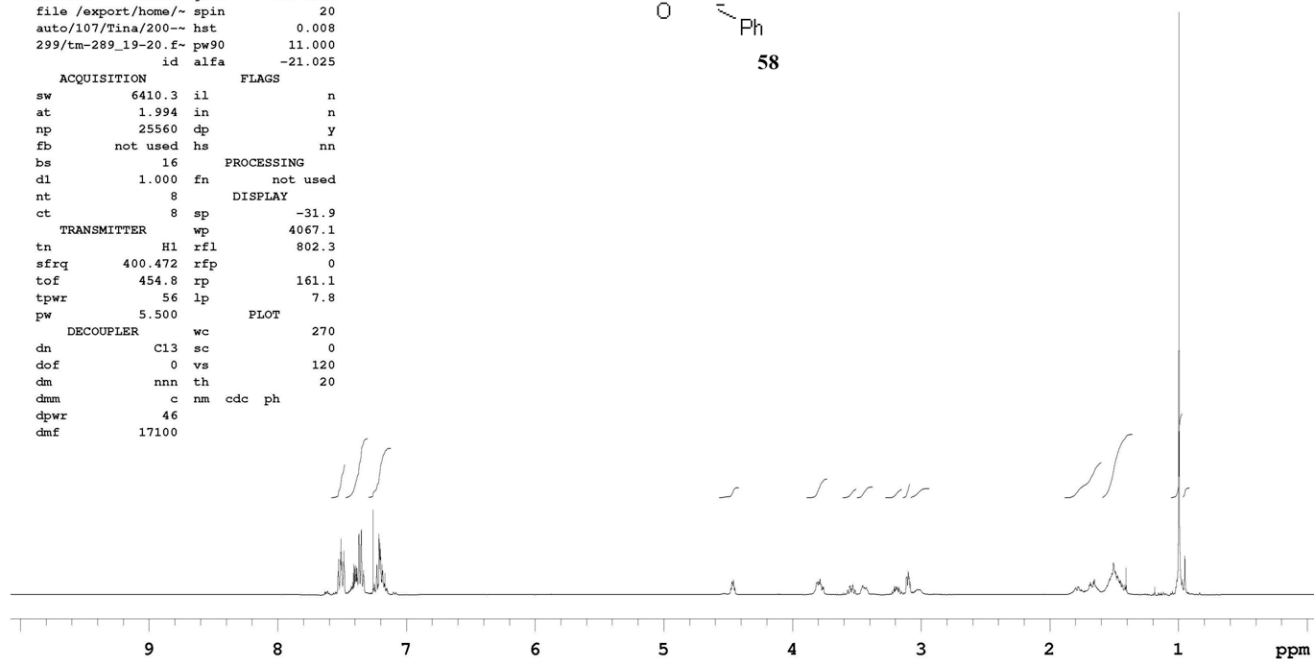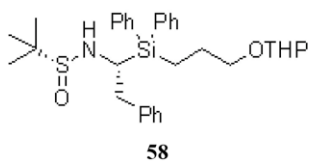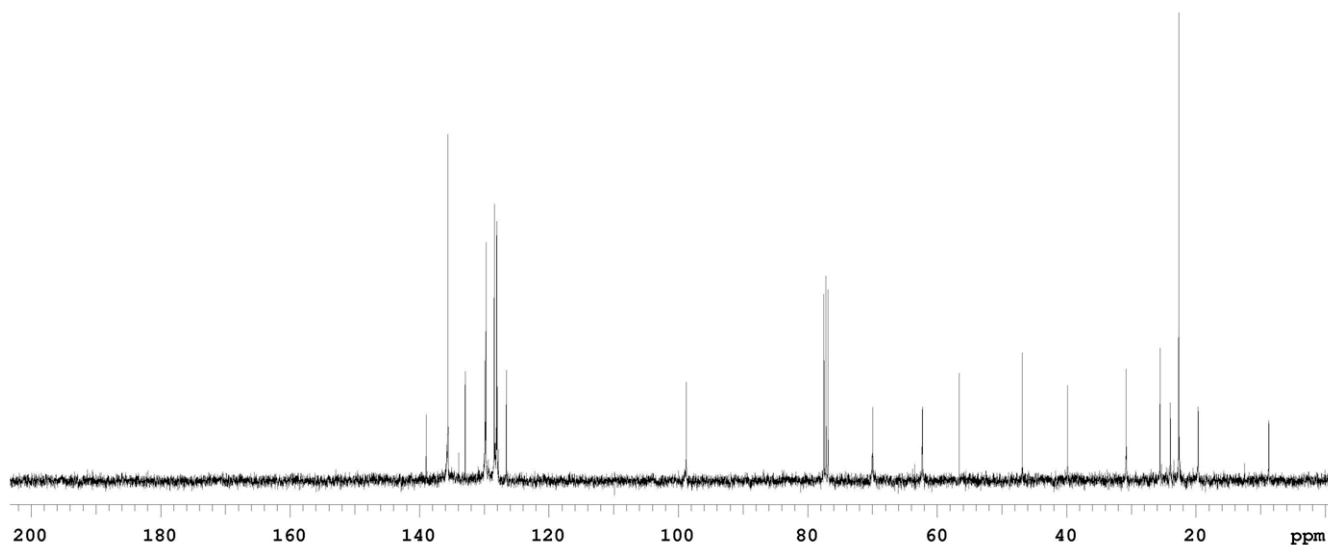

## S59

tm-291\_18-25

expl s2pul

| SAMPLE              |                | SPECIAL |          |
|---------------------|----------------|---------|----------|
| date                | Jul 15 2009    | temp    | 26.0     |
| solvent             | CDCl3          | gain    | not used |
| file                | /export/home/~ | spin    | 20       |
| auto/107/Tina/200-- | hst            | 0.008   |          |
| 299/tm-291_18-25.f~ | pw90           | 11.000  |          |
|                     | id             | alfa    | -21.025  |

| ACQUISITION |          | FLAGS      |          |
|-------------|----------|------------|----------|
| sw          | 6410.3   | il         | n        |
| at          | 1.994    | in         | n        |
| np          | 25560    | dp         | y        |
| fb          | not used | hs         | nn       |
| bs          | 16       | PROCESSING |          |
| dl          | 1.000    | fn         | not used |
| nt          | 8        | DISPLAY    |          |
| ct          | 8        | sp         | -4.2     |
| TRANSMITTER |          | wp         | 3648.0   |
| tn          | H1       | rfl        | 802.3    |
| sfrq        | 400.472  | rfp        | 0        |
| tof         | 454.8    | rp         | 157.9    |
| tpwr        | 56       | lp         | 14.1     |
| pw          | 5.500    | PLOT       |          |
| DECOUPLER   |          | wc         | 270      |
| dn          | C13      | sc         | 0        |
| dof         | 0        | vs         | 128      |
| dm          | nnn      | th         | 20       |
| dmm         | c        | nm         | cdc ph   |
| dpwr        | 46       |            |          |
| dmf         | 17100    |            |          |

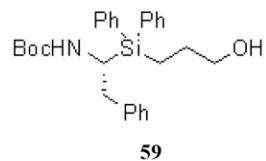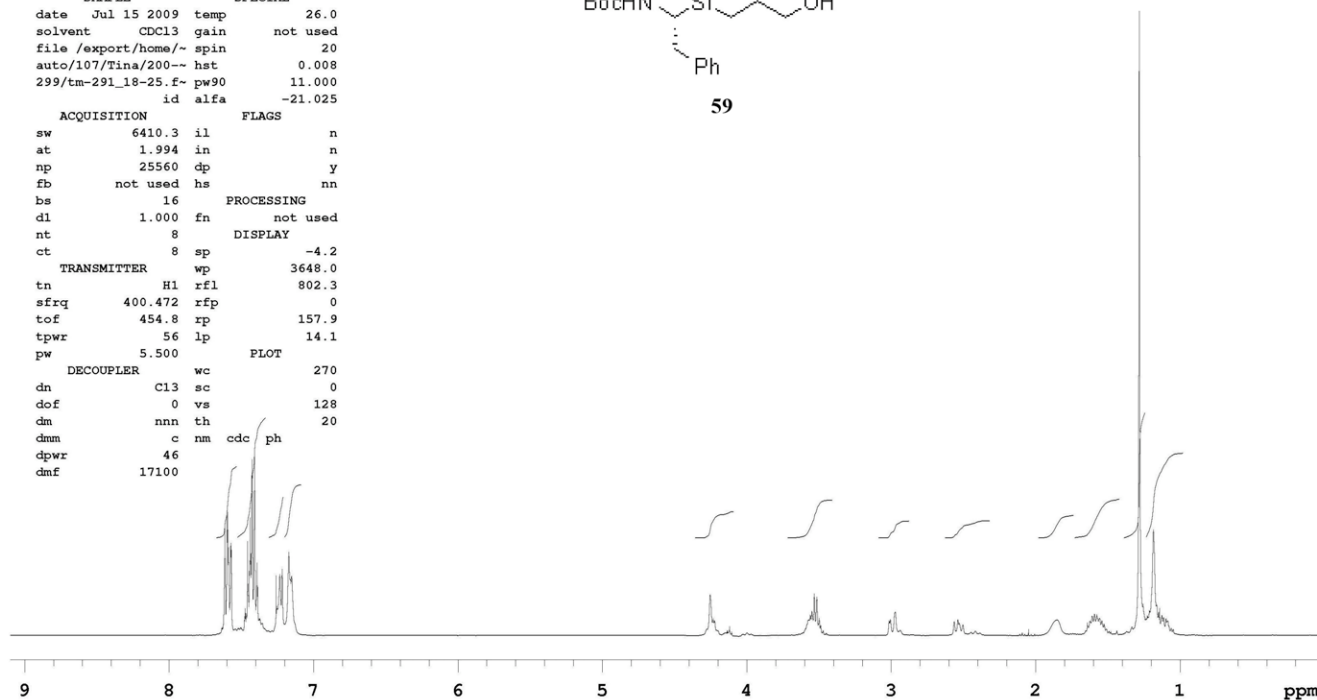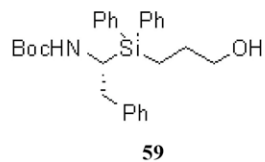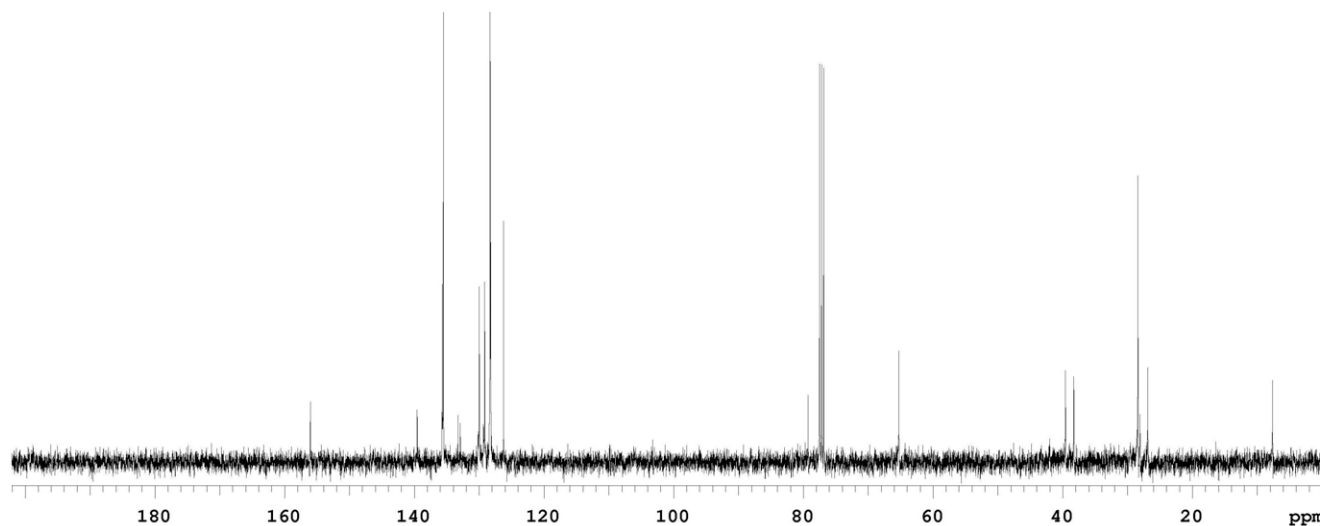

```
exp1  s2pul
```

| SAMPLE              |                | SPECIAL |          |
|---------------------|----------------|---------|----------|
| date                | Aug 24 2009    | temp    | 26.0     |
| file                | CD30D          | gain    | not used |
| file                | /export/home/~ | spin    | 20       |
| auto/107/Tina/200~  |                | hst     | 0.008    |
| 299/tm-294-16-16Me~ |                | pw90    | 11.000   |
|                     | OHL.fid        | alfa    | -21.025  |

| ACQUISITION |          | FLAGS |    |
|-------------|----------|-------|----|
| sw          | 6410.3   | il    | n  |
| at          | 1.994    | in    | n  |
| np          | 25560    | dp    | y  |
| fb          | not used | hs    | nn |

|    |       |             |
|----|-------|-------------|
| bs | 16    | PROCESSING  |
| dl | 1.000 | fn not used |
| nt | 8     | DISPLAY     |
| ct | 8     | sp -61.4    |

|             |         |     |        |
|-------------|---------|-----|--------|
| TRANSMITTER |         | wp  | 3706.3 |
| tn          | H1      | rfl | 2125.3 |
| sfrq        | 400.474 | rfp | 1325.6 |
| tof         | 454.8   | rp  | 160.9  |
| tpwr        | 56      | lp  | 25.4   |

|           |       |      |        |     |
|-----------|-------|------|--------|-----|
| pw        | 5.500 | PLOT |        |     |
| DECOUPLER |       | wc   |        | 270 |
| dn        | C13   | sc   |        | 0   |
| dof       | 0     | vs   |        | 461 |
| dm        | nnn   | th   |        | 13  |
| dmm       | c     | nm   | cdc ph |     |
| dpwr      | 46    |      |        |     |
| dmf       | 17100 |      |        |     |

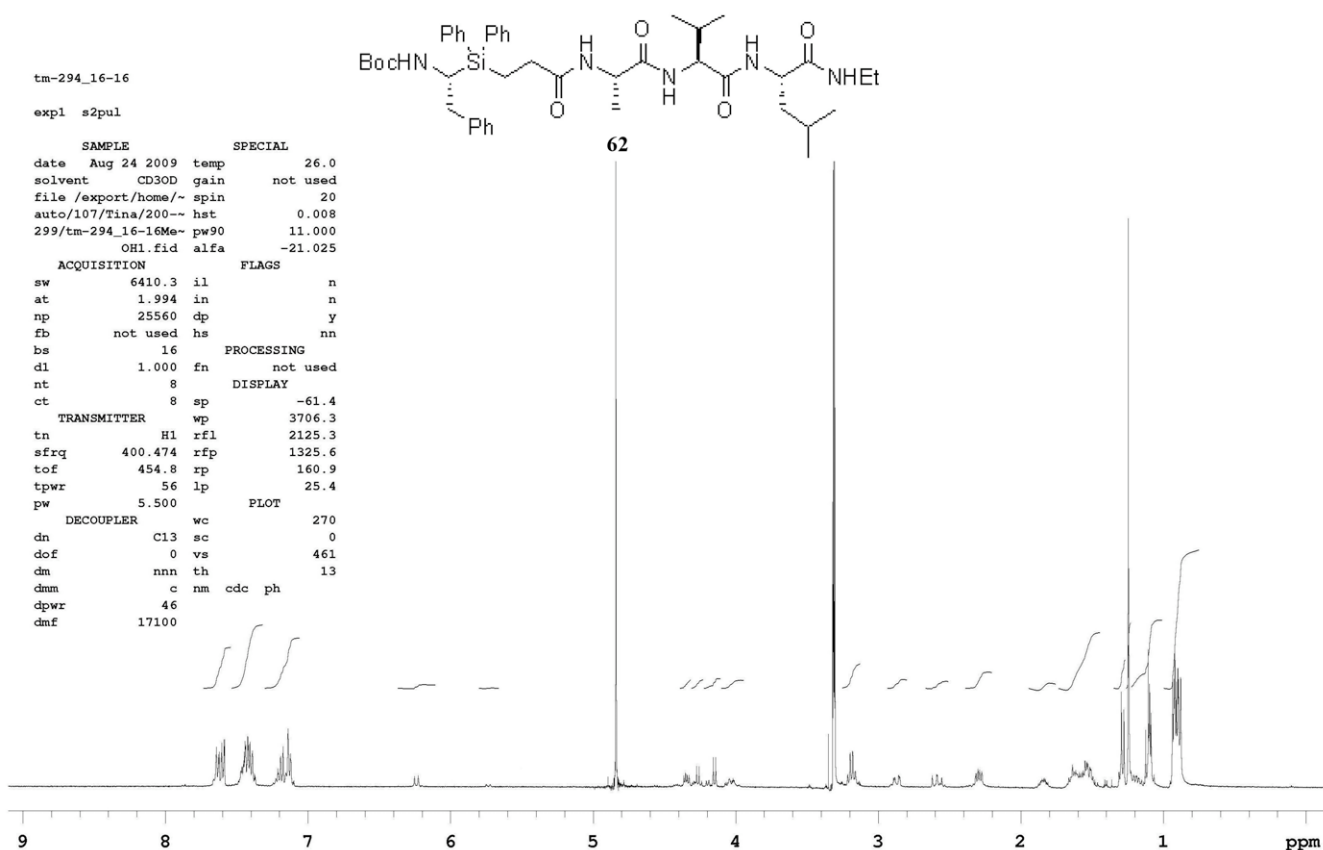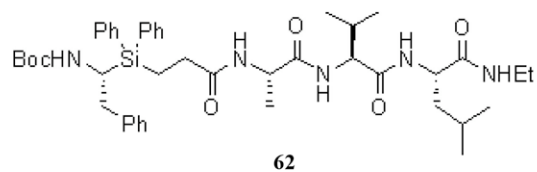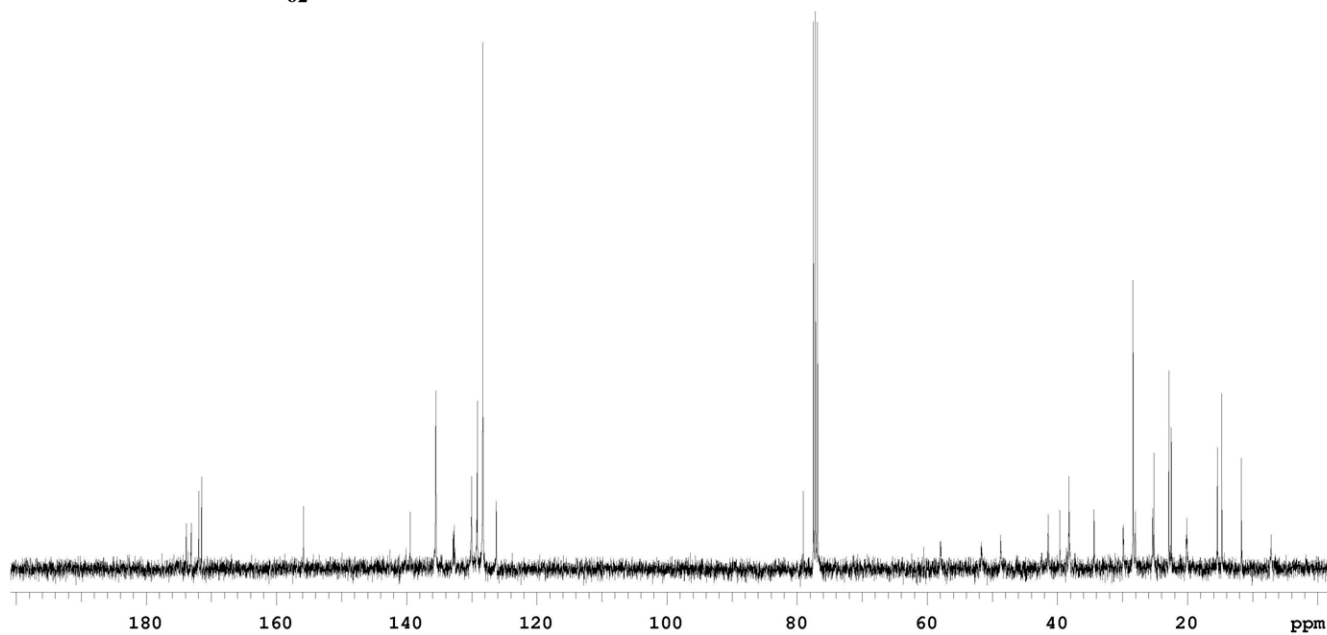



tm-296\_9-23

expl s2pul

| SAMPLE              |                | SPECIAL |          |
|---------------------|----------------|---------|----------|
| date                | Aug 27 2009    | temp    | 26.0     |
| solvent             | CD3OD          | gain    | not used |
| file                | /export/home/~ | spin    | 20       |
| auto/107/Tina/200-- | hst            | 0.008   |          |
| 299/tm-296_9-23H.f~ | pw90           | 11.000  |          |
|                     | id             | alfa    | -21.025  |

  

| ACQUISITION |          | FLAGS |    |
|-------------|----------|-------|----|
| sw          | 6410.3   | il    | n  |
| at          | 1.994    | in    | n  |
| np          | 25560    | dp    | y  |
| fb          | not used | hs    | nn |
| bs          | 16       |       |    |

  

| TRANSMITTER |         | PROCESSING |          |
|-------------|---------|------------|----------|
| di          | 1.000   | fn         | not used |
| nt          | 8       |            |          |
| ct          | 8       | sp         | -13.3    |
|             |         | wp         | 3650.0   |
| tn          | H1      | rfl        | 2125.3   |
| sfrq        | 400.474 | rpf        | 1325.6   |
| tof         | 454.8   | rp         | 160.8    |
| tpwr        | 56      | lp         | 25.4     |
| pw          | 5.500   |            |          |

  

| DECOUPLER |       | PLOT |        |
|-----------|-------|------|--------|
| dn        | C13   | sc   | 270    |
| dof       | 0     | vs   | 335    |
| dm        | nnn   | th   | 18     |
| dmm       | c     | nm   | cdc ph |
| dpwr      | 46    |      |        |
| dmf       | 17100 |      |        |

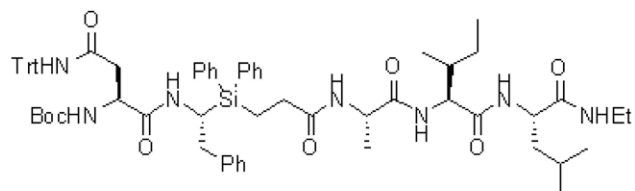

64

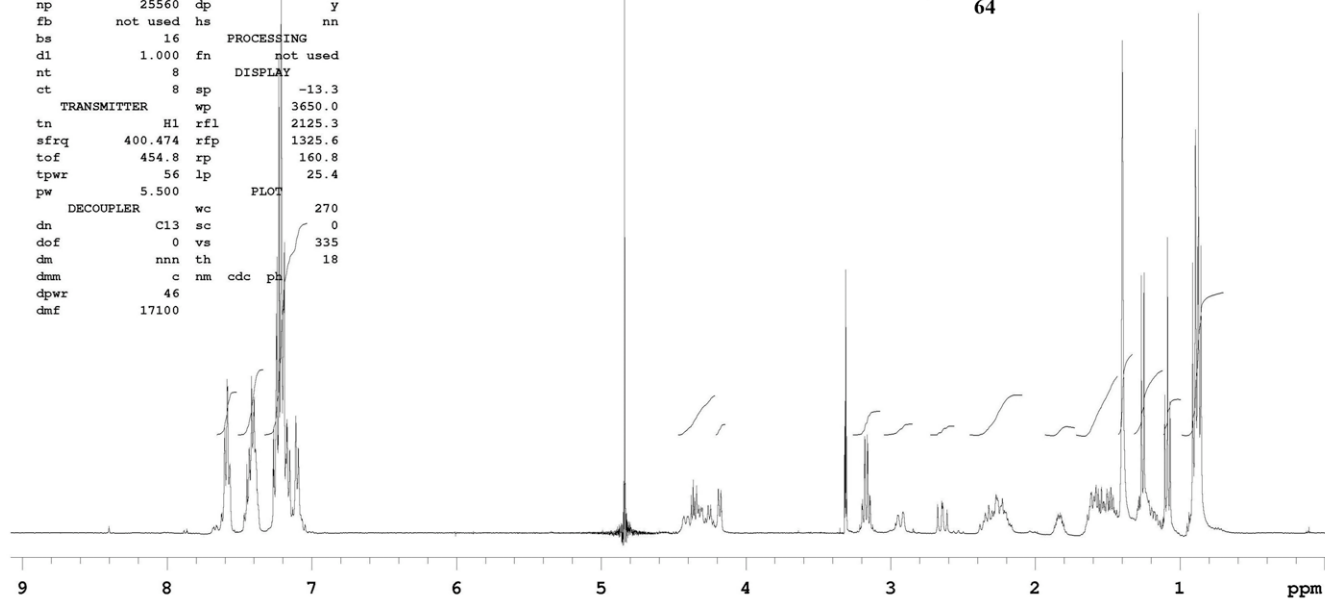

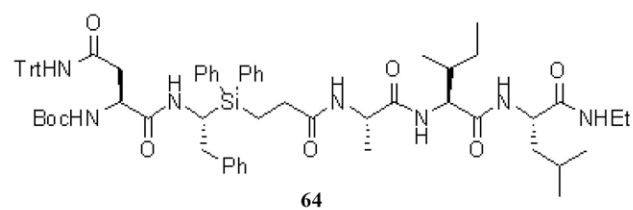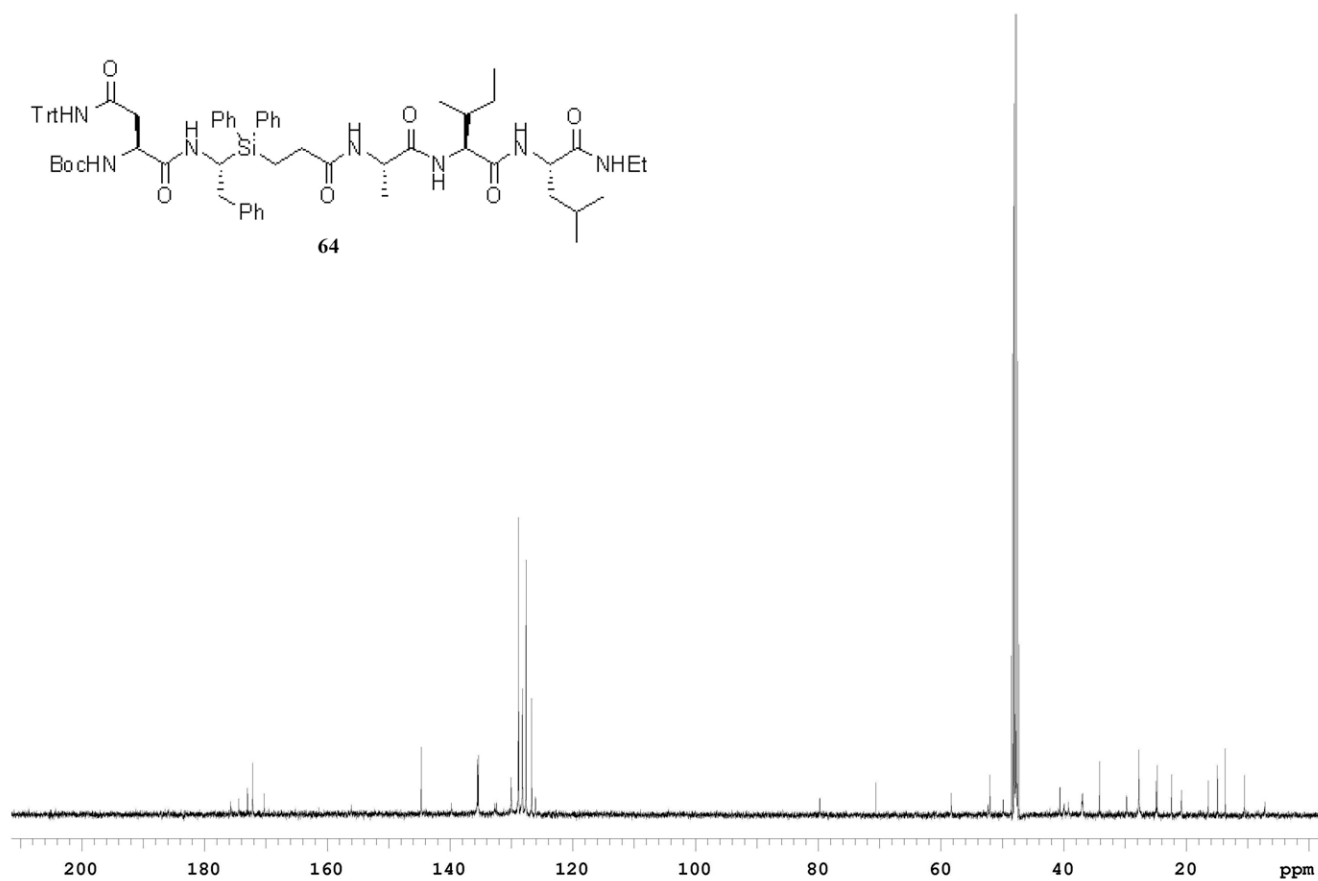

Supplement: Supplementary file 1 [file 4462024]
